# Supplementary material for: Synthesis of unnatural α-amino acid derivatives via selective o-C–H functionalization
Source: Royal Society of Chemistry journal article supplement (doi:10.1039/c7ob02921g), 2017-12-19

# Synthesis of Unnatural $\alpha$ - Amino Acid Derivatives *via* Selective *o*-C-H Functionalization

Wanting Zeng, Moldir Nukeyeva, Qiumei Wang and Chao Jiang\*

*School of Chemical Engineering, Nanjing University of Science and Technology, Nanjing 210094, China*

## Table of Contents

|                                                                              |   |
|------------------------------------------------------------------------------|---|
| 1. Procedure for the synthesis of compound 1a~1d.....                        | 1 |
| 2. General procedure for the scale up experiment on gram scale.....          | 2 |
| 3. Removal of directing group.....                                           | 2 |
| 4. Optimization tables for chlorination, alkylation and acyloxylation.....   | 3 |
| 5. The attempts and result of mono-arylation of $\alpha$ -phenylglycine..... | 6 |
| 6. $^1\text{H}$ and $^{13}\text{C}$ NMR spectra of compounds.....            | 8 |

## 1. Procedure for the synthesis of compound 1a~1d

**Procedure A for the synthesis of compound 1a and 1d.** A suspension of  $\alpha$ -phenylglycine or phenylalanine (10 mmol) in MeOH (30 ml) was cooled to 0 °C in an ice-water bath and  $\text{SOCl}_2$  (1.5 mL) added dropwise over 10 min. The clear solution was elevated to ambient temperature and stirred for 4 h, continuously evaporated with DCM. The solvent was removed under vacuum to give the crude amino acid ester hydrochloride as a white solid, which was used directly for the next step. (Reference: B. R. Aluri, B. Niaz, M. K. Kindermann, P. G. Jones and J. Heinicke, *Dalton Trans.*, 2011, **40**, 211-224.)

Pyridine-2-carboxylic acid (11 mmol) was treated with  $\text{SOCl}_2$  (10.0 mL) at reflux temperature for 3 h. Excess  $\text{SOCl}_2$  was then removed under vacuum to give the crude acid chloride. The crude acid chloride was diluted with dry  $\text{CH}_2\text{Cl}_2$  (20 mL). A solution of the crude amino acid ester hydrochloride (10 mmol) and  $\text{NEt}_3$  (40 mmol) in dichloromethane (20 mL) was added dropwise to the acid chloride solution at 0 °C. The resulting mixture was allowed warm to r.t., and then stirred overnight. The mixture was quenched with saturated  $\text{NaHCO}_3$  solution and extracted with  $\text{CH}_2\text{Cl}_2$  three times. These extracts were combined and dried over  $\text{MgSO}_4$ . After evaporation in vacuo, the crude amide product was purified by silica gel chromatography using  $\text{CH}_2\text{Cl}_2$  /ethyl acetate as the eluent to give the desired product. (Reference: R. Shang, L. Ilies, S. Asako and E. Nakamura, *J. Am. Chem. Soc.*, 2014, **136**, 14349-14352.)

**Procedure B for the synthesis of compound 1b.** methyl 2-(4-hydroxyphenyl)-2-(picolinamido) acetate (**1e**; 1.43 g, 5 mmol) was dissolved in 20 mL of dichloromethane and treated sequentially with imidazole (374 mg, 5.5 mmol) and tertbutyldimethylsilyl chloride (829 mg, 5.5 mmol). The reaction was stirred for 16 h at room temperature and concentrated to remove dichloromethane. The

crude oil was then taken up in EtOAc and washed with saturated aqueous NaHCO<sub>3</sub> (2x), water (1x), saturated aqueous NaCl (1x), and dried over MgSO<sub>4</sub>. Concentration and through drying under vacuum yielded 85% of **1b** as a yellow oil. (Reference: J. S. Oakdale, L. Kwisnek and V. V. Fokin, *Macromolecules*, 2016, **49**, 4473-4479.)

**Procedure C for the synthesis of compound 1c.** A 250 mL two-necked flask equipped with a stir bar and a condenser coil was charged with anhydrous potassium carbonate (5 mmol, 691 mg), methyl 2-(4-hydroxyphenyl)-2-(picolinamido) acetate (**1e**; 1.43 g, 5 mmol), acetone (30 mL), and (2-bromoethyl)benzene (5 mmol, 855 mg) were added. The mixture was refluxed until TLC analysis indicated complete consumption of the (2-bromoethyl)benzene. The reaction mixture was cooled to room temperature and filtered. The filtrate was evaporated and dissolved in ethyl acetate (30 mL). The resulting solution was washed with 5% aqueous solution of potassium hydroxide (30 mL) and brine (30 mL) and dried over anhydrous sodium sulfate. The solvent was evaporated, and the residue was purified by column chromatography (hexane/ethyl acetate 10:1) to give **1c** as a yellow solid yielded 83 %. (Reference: W. B. Wu and J. M. Huang, *J. Org. Chem.*, 2014, **79**, 10189-10195.)

## 2. General procedure for the scale up experiment on gram scale

To a 100 mL round bottom flask, **1a** (1.08 g, 4 mmol), 4-Bromo-1-iodobenzene (**2g**; 5.66 g, 20 mmol), AgOAc (1.67 g, 10 mol), Pd(OAc)<sub>2</sub> (89.6 mg, 0.4 mmol) and *t*-AmylOH (30 mL) were added, reflux at 130 °C in oil bath for 48 h. After cooling to room temperature, The mixture was filtered through a celite pad and concentrated in vacuo. The residue was purified by column chromatography on silica gel (eluent: petroleum ether /EtOAc) to afford the desired arylated product **3g** as a white solid.

## 3. Removal of directing group

To a 15 mL Schlenk tube, **3g** (58 mg, 0.1 mmol) and MeOH (1 mL) were added under atmospheric air. The reaction solution was stirred at room temperature and BF<sub>3</sub>·Et<sub>2</sub>O (0.126 mL, 1 mmol) was added dropwise to the stirred solution. The tube was sealed with a teflon-coated cap and the mixture was stirred at 130 °C for 48 h. After being cooled to ambient temperature, the mixture was quenched by slow addition of saturated Na<sub>2</sub>CO<sub>3</sub> solution. The aqueous phase was extracted with ethyl acetate (3 × 10 mL). The combined organic layers were next washed with brine, dried over anhydrous Na<sub>2</sub>SO<sub>4</sub>, filtered and concentrated in vacuo. The residue was dissolved in DCM (1 mL). Et<sub>3</sub>N (0.027 mL, 0.2 mmol) and Boc<sub>2</sub>O (43.6 mg, 0.2 mmol) were then added. The solution was stirred 6 h at room temperature. After concentration, the mixture was purified by column chromatography using petroleum ether/EtOAc as the eluent, and the product **5** was obtained as white solid (84 %). (Reference: K. Li, Q. Wu, J. Lan and J. You, *Nat. Commun.*, 2015, **6**, 8404.)

#### 4. Optimization tables for chlorination, alkylation and acyloxylation

**Table S1** Optimization of the reaction conditions for di-chlorination of phenylglycine<sup>a</sup>

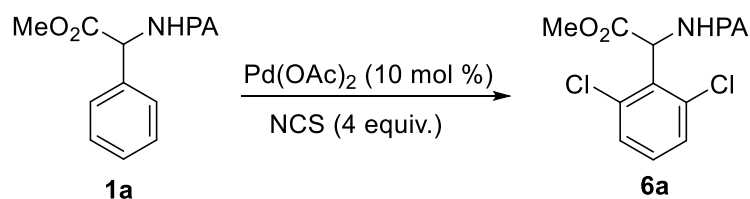

| Entry | Solvent            | Oxidant (eq.)                       | T (°C) | Time (h) | Yield <sup>b</sup> (%) |
|-------|--------------------|-------------------------------------|--------|----------|------------------------|
| 1     | DCE                | no                                  | 100    | 24       | 0                      |
| 2     | CH <sub>3</sub> CN | no                                  | 100    | 24       | 0                      |
| 3     | toluene            | no                                  | 110    | 24       | trace                  |
| 4     | <i>p</i> -xylene   | no                                  | 110    | 24       | 7                      |
| 5     | <i>t</i> -AmylOH   | no                                  | 110    | 24       | 0                      |
| 6     | toluene            | Ag <sub>2</sub> O (3)               | 110    | 24       | 21                     |
| 7     | toluene            | AgOAc (3)                           | 110    | 24       | trace                  |
| 8     | toluene            | PhI(OAc) <sub>2</sub> (3)           | 110    | 24       | 0                      |
| 9     | DCE                | PhI(OAc) <sub>2</sub> (3)           | 110    | 24       | 0                      |
| 10    | <i>p</i> -xylene   | Ag <sub>2</sub> O (3)               | 110    | 36       | 52                     |
| 11    | <i>p</i> -xylene   | AgF (3)                             | 110    | 36       | 77                     |
| 12    | <i>p</i> -xylene   | Ag <sub>2</sub> CO <sub>3</sub> (3) | 110    | 36       | 10                     |
| 13    | <i>p</i> -xylene   | AgOAc (3)                           | 110    | 36       | 5                      |

<sup>a</sup>Conditions: **1a** (0.1 mmol), Pd(OAc)<sub>2</sub> (10 mol %), NCS (4 equiv.), oxidant (3 equiv.), solvent (1mL). <sup>b</sup>Isolated yield.

**Table S2** Optimization of the reaction conditions for mono-alkylation of phenylglycine<sup>a</sup>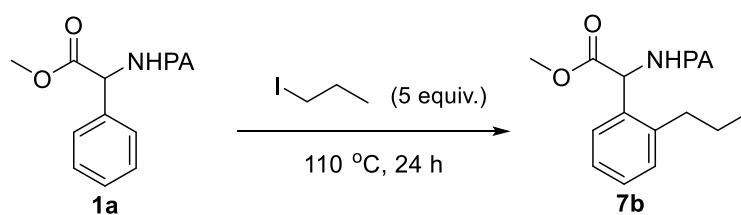

| Entry           | Cat. (10 mol %)      | Base (2 eq.)                    | Additive (2 eq.) | Solvent          | Yield <sup>b</sup> (%) |
|-----------------|----------------------|---------------------------------|------------------|------------------|------------------------|
| 1               | Pd(OAc) <sub>2</sub> | NaHCO <sub>3</sub>              | NaTFA            | <i>t</i> -AmylOH | 12                     |
| 2               | Pd(OAc) <sub>2</sub> | NaHCO <sub>3</sub>              | NaOTf            | <i>t</i> -AmylOH | 10                     |
| 3               | Pd(OAc) <sub>2</sub> | NaHCO <sub>3</sub>              | PivOH            | <i>t</i> -AmylOH | 0                      |
| 4               | Pd(OAc) <sub>2</sub> | NaHCO <sub>3</sub>              | no               | <i>t</i> -AmylOH | 27                     |
| 5               | PdCl <sub>2</sub>    | NaHCO <sub>3</sub>              | no               | <i>t</i> -AmylOH | 0                      |
| 6               | Pd(TFA) <sub>2</sub> | NaHCO <sub>3</sub>              | no               | <i>t</i> -AmylOH | 10                     |
| 7               | Pd(OAc) <sub>2</sub> | K <sub>2</sub> HPO <sub>4</sub> | no               | <i>t</i> -AmylOH | 25                     |
| 8               | Pd(OAc) <sub>2</sub> | Cs <sub>2</sub> CO <sub>3</sub> | no               | <i>t</i> -AmylOH | 27                     |
| 9               | Pd(OAc) <sub>2</sub> | KOAc                            | no               | <i>t</i> -AmylOH | 23                     |
| 10              | Pd(OAc) <sub>2</sub> | Na <sub>2</sub> CO <sub>3</sub> | no               | <i>t</i> -AmylOH | 24                     |
| 11              | Pd(OAc) <sub>2</sub> | NaOAc                           | no               | <i>t</i> -AmylOH | 20                     |
| 12              | Pd(OAc) <sub>2</sub> | NaHCO <sub>3</sub>              | no               | toluene          | 15                     |
| 13              | Pd(OAc) <sub>2</sub> | NaHCO <sub>3</sub>              | no               | DCE              | 30                     |
| 14 <sup>c</sup> | Pd(OAc) <sub>2</sub> | NaHCO <sub>3</sub>              | no               | DCE              | 45                     |

<sup>a</sup>Conditions: **1a** (0.1 mmol), Pd catalyst (10 mol %), RI (5 equiv.), base (2 equiv.), additives (2 equiv.), solvent (1 mL). <sup>b</sup>Isolated yield. <sup>c</sup>Oxygen atmosphere.

**Table S3** Optimization of the reaction conditions for di-acyloxylation of phenylglycine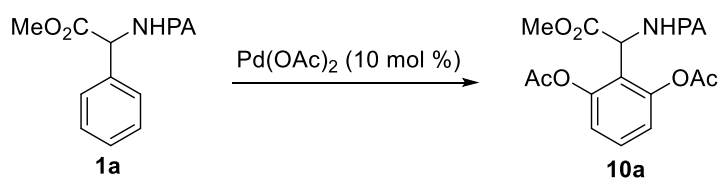

| Entry | Oxidant (eq.)                        | $\text{Ac}_2\text{O}$ (eq.) | Base (eq.)                   | Solvent                                 | Yield <sup>b</sup> (%) |
|-------|--------------------------------------|-----------------------------|------------------------------|-----------------------------------------|------------------------|
| 1     | $\text{PhI}(\text{OAc})_2$ (5)       | no                          | no                           | toluene                                 | 22                     |
| 2     | $\text{PhI}(\text{OAc})_2$ (5)       | no                          | no                           | p-xylene                                | 20                     |
| 3     | $\text{PhI}(\text{OAc})_2$ (5)       | no                          | no                           | $\text{Ac}_2\text{O}$                   | 0                      |
| 4     | $\text{PhI}(\text{OAc})_2$ (5)       | no                          | no                           | $\text{Ac}_2\text{O}:\text{AcOH}$ (1:1) | 0                      |
| 5     | $\text{PhI}(\text{OAc})_2$ (5)       | no                          | no                           | DCE                                     | 3                      |
| 6     | $\text{PhI}(\text{OAc})_2$ (5)       | no                          | $\text{Ag}_2\text{CO}_3$ (3) | toluene                                 | 40                     |
| 7     | $\text{PhI}(\text{OAc})_2$ (5)       | no                          | $\text{Li}_2\text{CO}_3$ (3) | toluene                                 | 0                      |
| 8     | $\text{PhI}(\text{OAc})_2$ (5)       | no                          | $\text{Na}_2\text{CO}_3$ (3) | toluene                                 | 0                      |
| 9     | $\text{PhI}(\text{OAc})_2$ (5)       | no                          | $\text{Ag}_2\text{CO}_3$ (1) | toluene                                 | 40                     |
| 10    | $\text{PhI}(\text{OAc})_2$ (4)       | no                          | $\text{Ag}_2\text{CO}_3$ (1) | toluene                                 | 42                     |
| 11    | $\text{PhI}(\text{OAc})_2$ (5)       | 10                          | $\text{Ag}_2\text{CO}_3$ (1) | toluene                                 | 65                     |
| 12    | $\text{PhI}(\text{OAc})_2$ (4)       | 10                          | $\text{Ag}_2\text{CO}_3$ (1) | toluene                                 | 69                     |
| 13    | $\text{PhI}(\text{OAc})_2$ (3)       | 10                          | $\text{Ag}_2\text{CO}_3$ (1) | toluene                                 | 59                     |
| 14    | $\text{K}_2\text{S}_2\text{O}_8$ (3) | 10                          | $\text{Ag}_2\text{CO}_3$ (1) | toluene                                 | 0                      |

<sup>a</sup>Conditions: **1a** (0.1 mmol),  $\text{Pd}(\text{OAc})_2$  (10 mol %), base, solvent (1mL). <sup>b</sup>Isolated yield.

## 5. The attempts and result of mono-arylation of $\alpha$ -phenylglycine

One of the referees commented about the mono-arylated product. It would be of great value if mono-arylation could be developed to access mono-arylated  $\alpha$ -phenylglycine derivatives. A lot of efforts were made to optimize the yield of the mono-arylated product *via* reducing the equivalents of aryl iodide to 1~1.5 equiv, however both the conversion of the reactions and the yields of mono-arylated product are low. Other efforts to achieve mono-arylation reaction included: solvent screening (DCE, toluene, dioxane, etc), additive screening ( $\text{AgCO}_3$ ,  $\text{AgF}$ ,  $\text{AgO}$ ,  $\text{K}_2\text{CO}_3$ ,  $\text{Li}_2\text{CO}_3$ ,  $\text{NaHCO}_3$ , etc), and different arylation reagents ( $\text{PhB(OH)}_2$ , diaryliodonium triflate, and diaryliodonium tetrafluoroborate). However, the yield of the mono-arylated product is always below 40%. The following are our inferior results of mono-arylation of  $\alpha$ -phenylglycine.

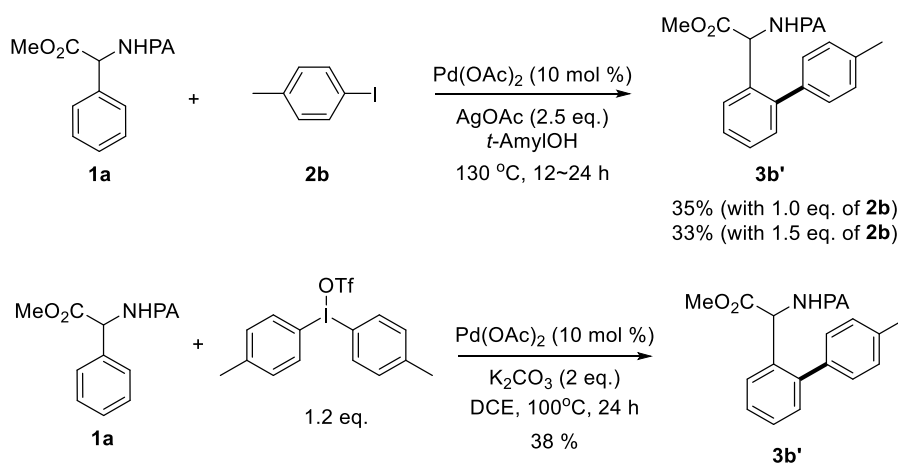

**Compound 3b'**:  $^1\text{H}$  NMR (300 MHz,  $\text{CDCl}_3$ )  $\delta$  8.76 (d,  $J = 6.5$  Hz, 1H), 8.57 (d,  $J = 4.7$  Hz, 1H), 8.12 (d,  $J = 7.8$  Hz, 1H), 7.81 (td,  $J = 7.7, 1.6$  Hz, 1H), 7.55 (dd,  $J = 5.4, 3.6$  Hz, 1H), 7.45 – 7.35 (m, 5H), 7.25 (d,  $J = 6.5$  Hz, 3H), 5.84 (d,  $J = 7.0$  Hz, 1H), 3.70 (s, 3H), 2.41 (s, 3H).  $^{13}\text{C}$  NMR (126 MHz,  $\text{CDCl}_3$ )  $\delta$  171.55, 163.64, 149.40, 148.26, 142.75, 137.33, 137.25, 137.20, 134.32, 130.96, 129.41, 129.07, 128.43, 128.02, 127.01, 126.38, 122.34, 53.73, 52.73, 21.29. HRMS (ESI) calcd. for  $\text{C}_{22}\text{H}_{20}\text{N}_2\text{O}_3$ : 360.1474. Found 360.1476.

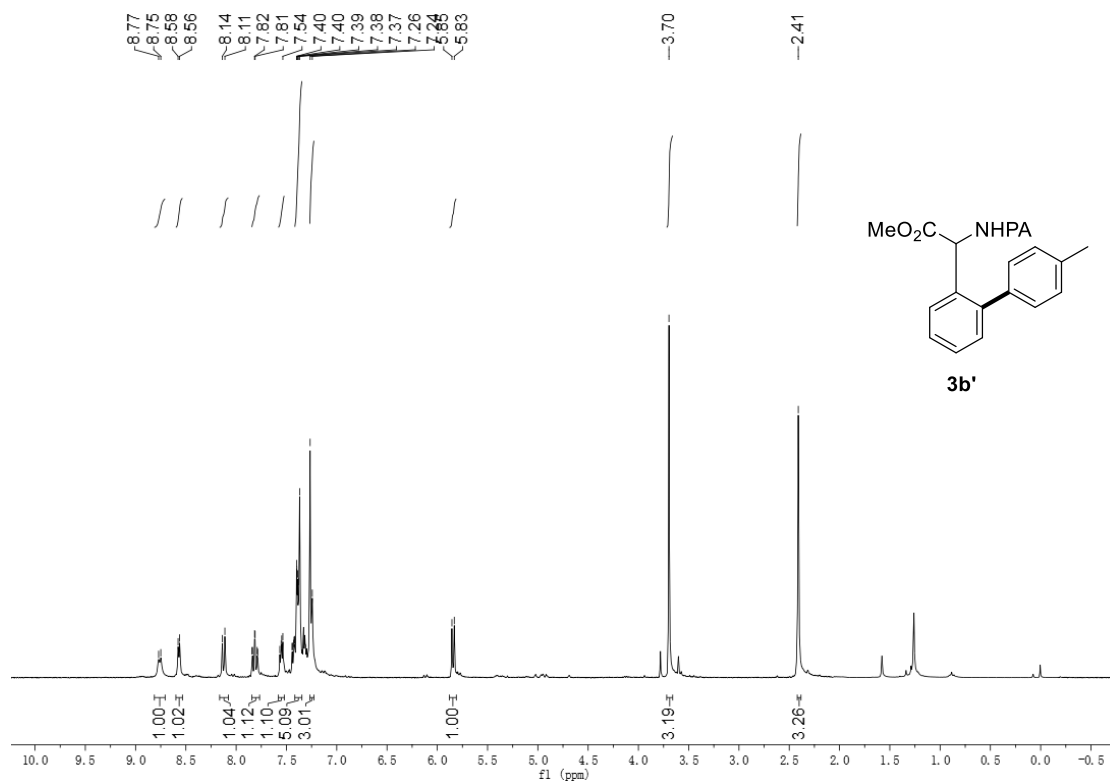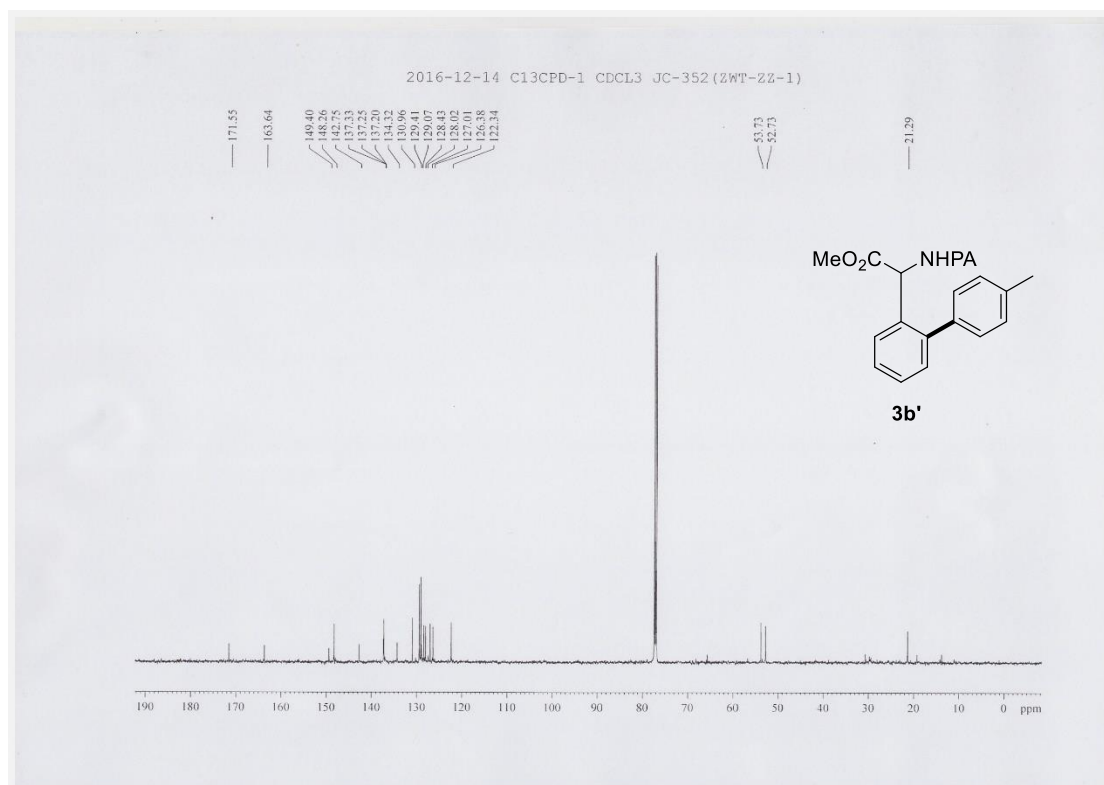

## 6. $^1\text{H}$ and $^{13}\text{C}$ NMR spectra of compounds

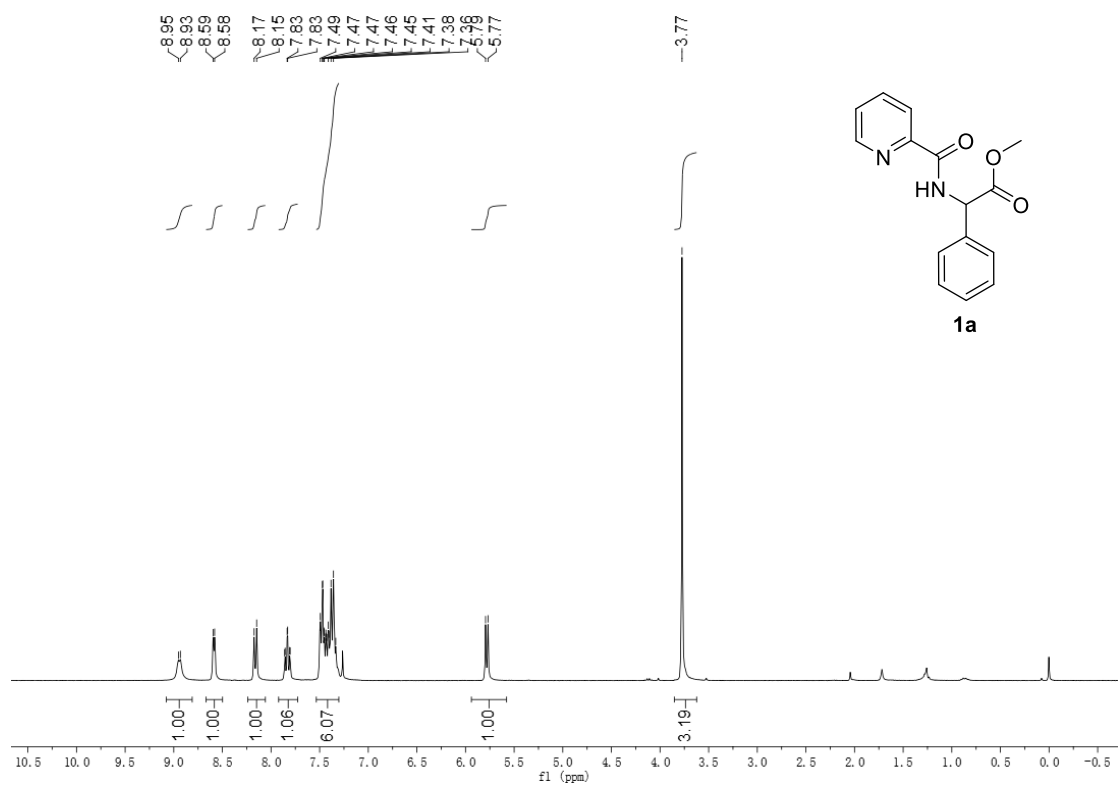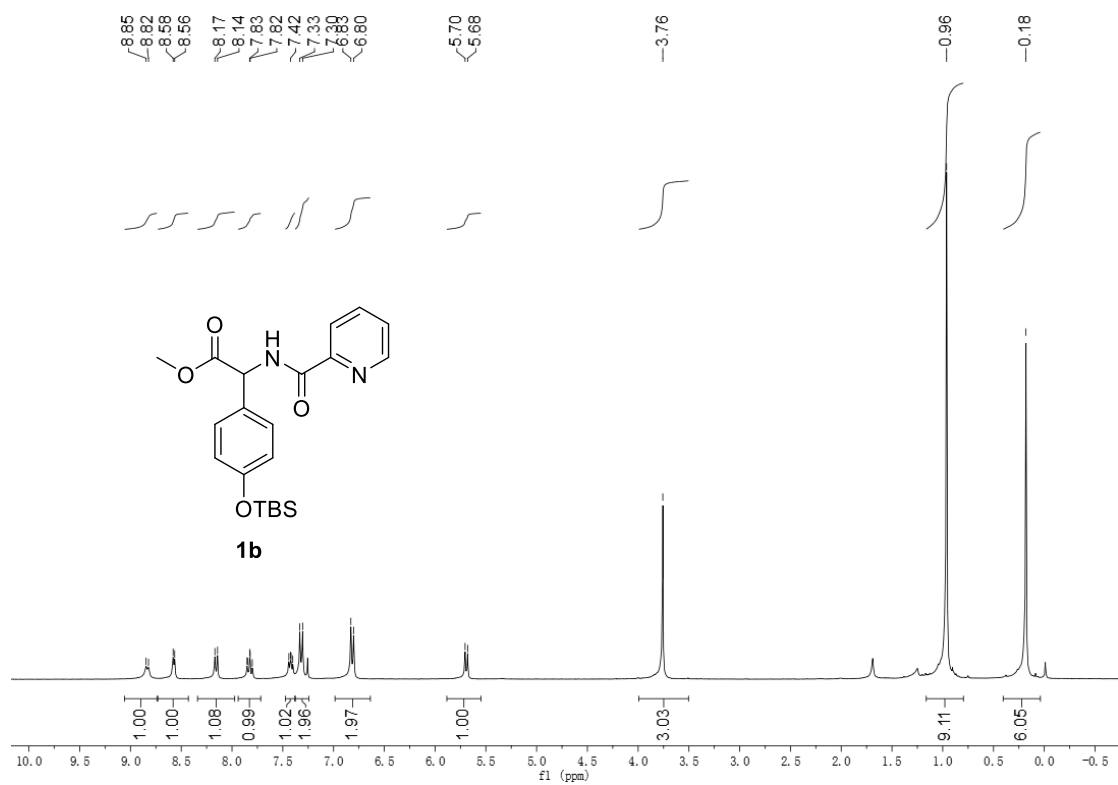



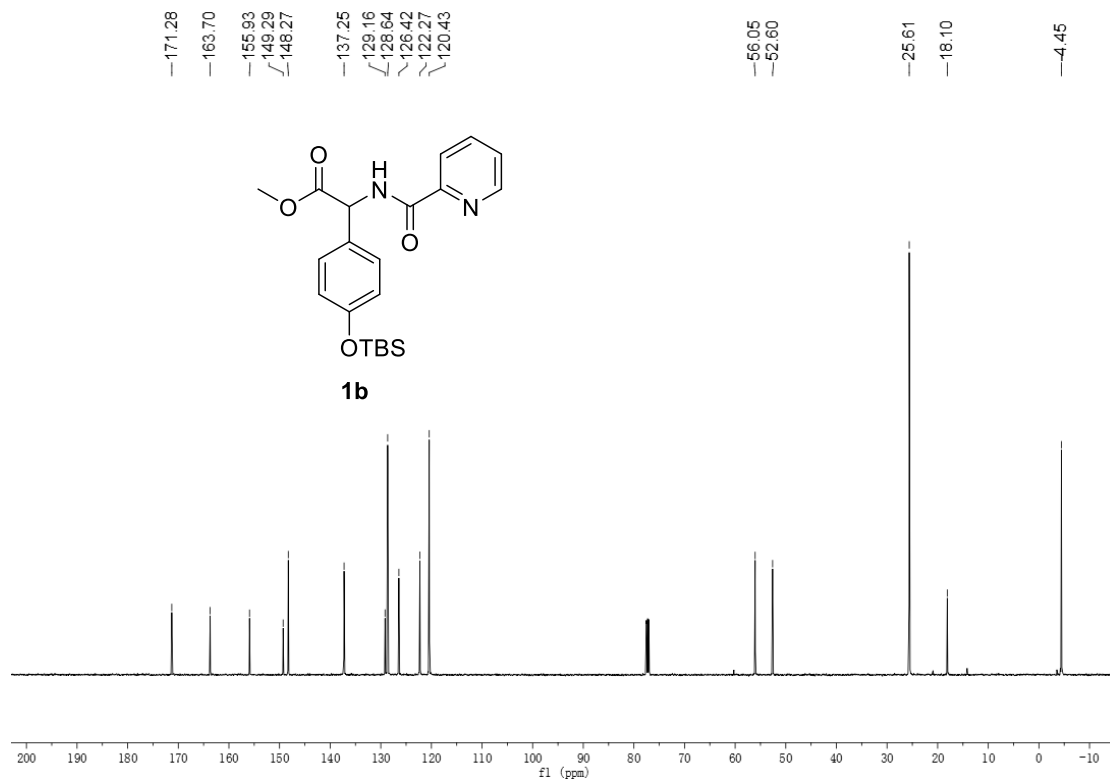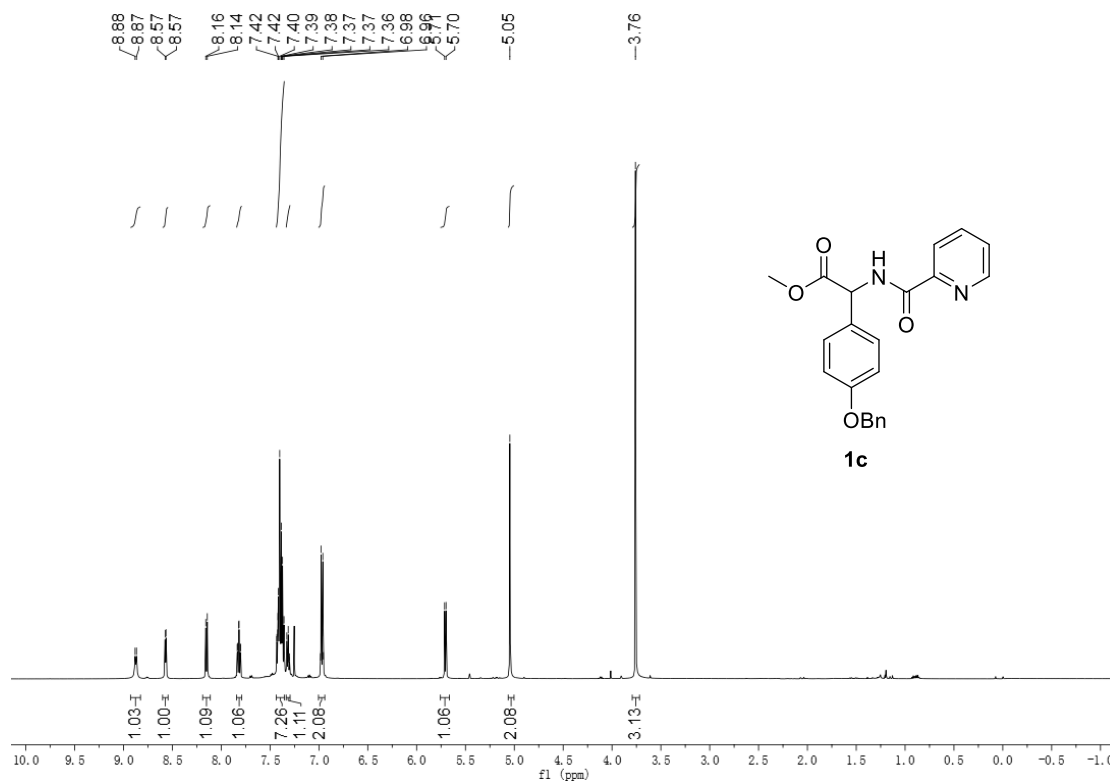

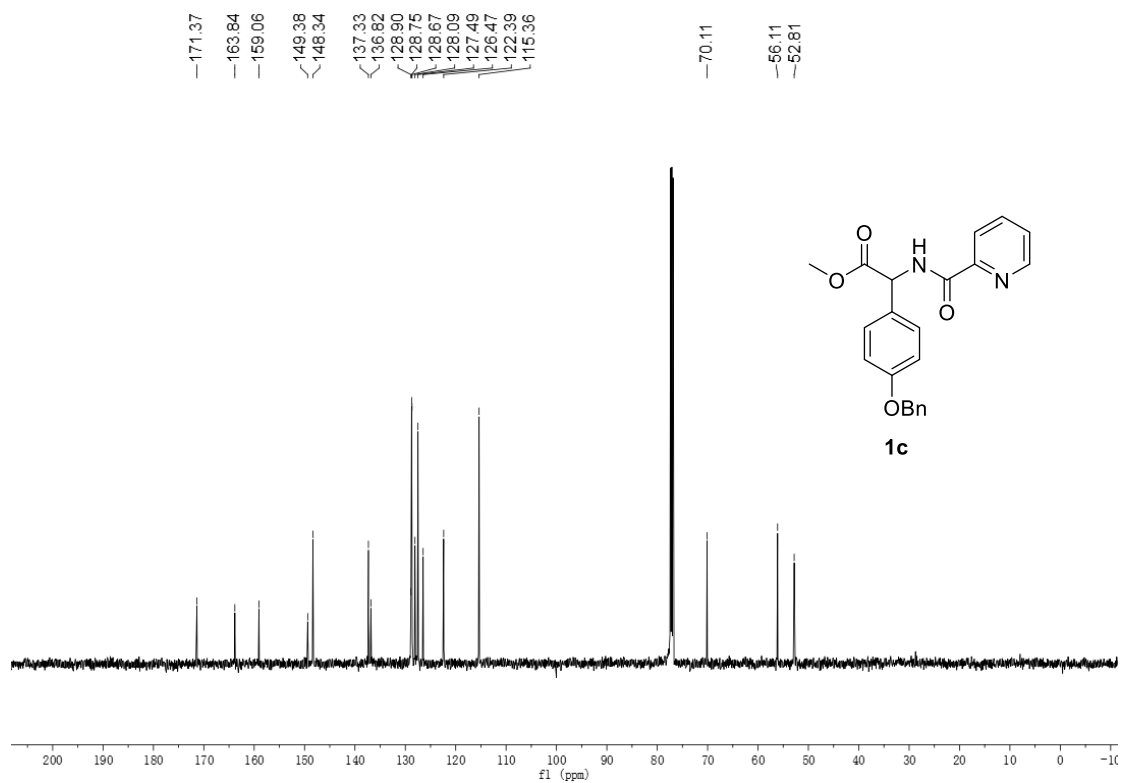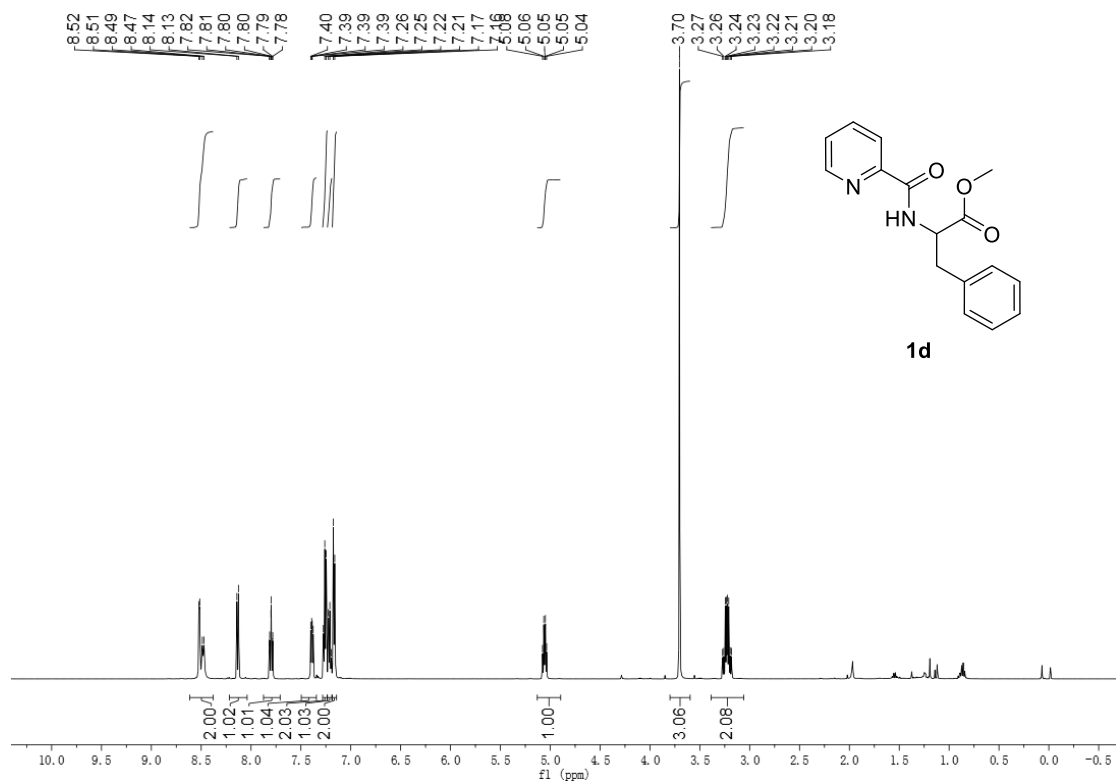

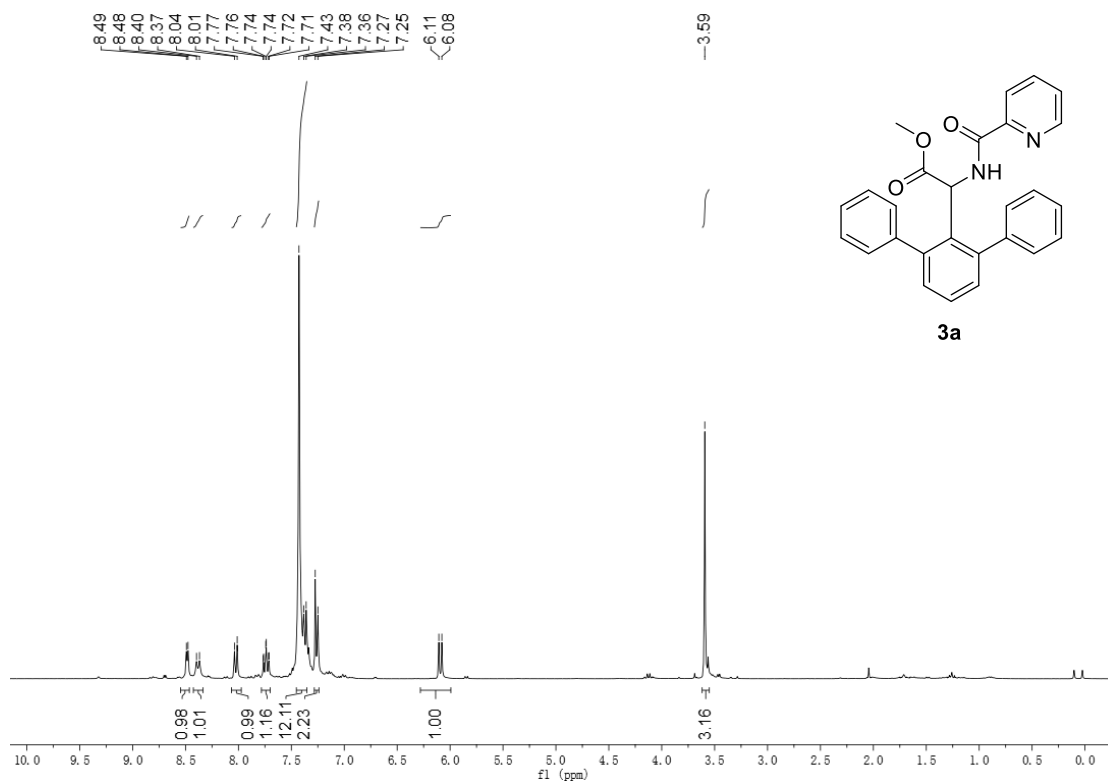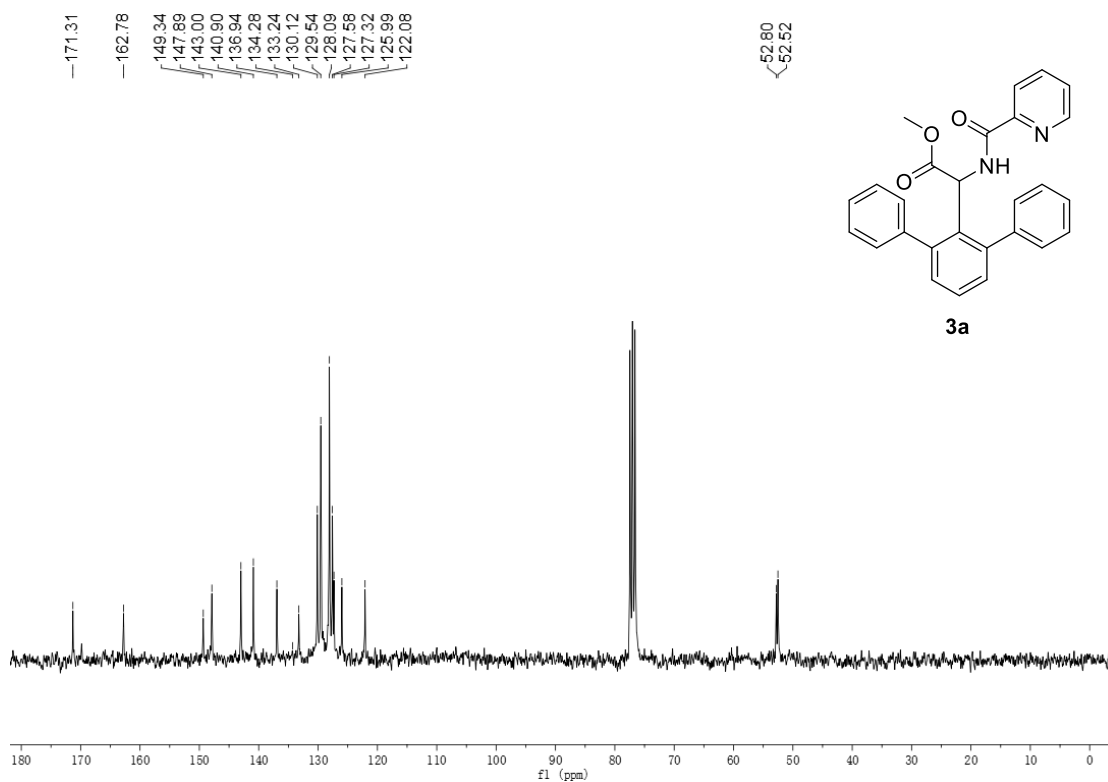

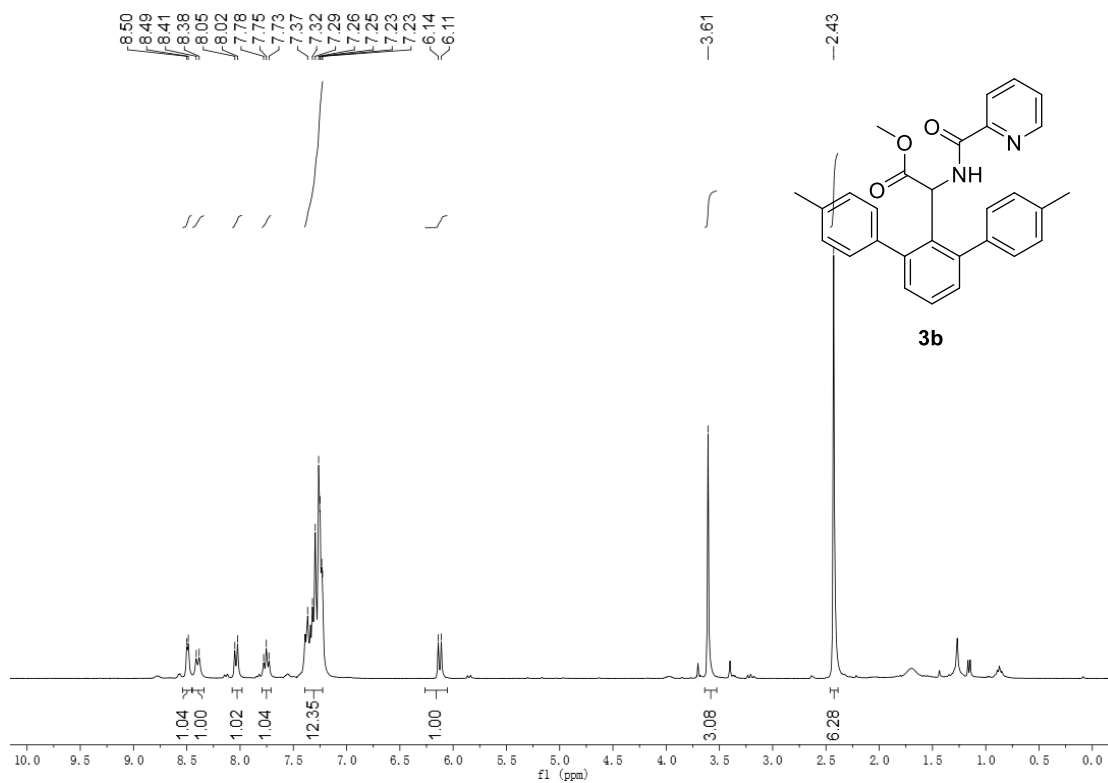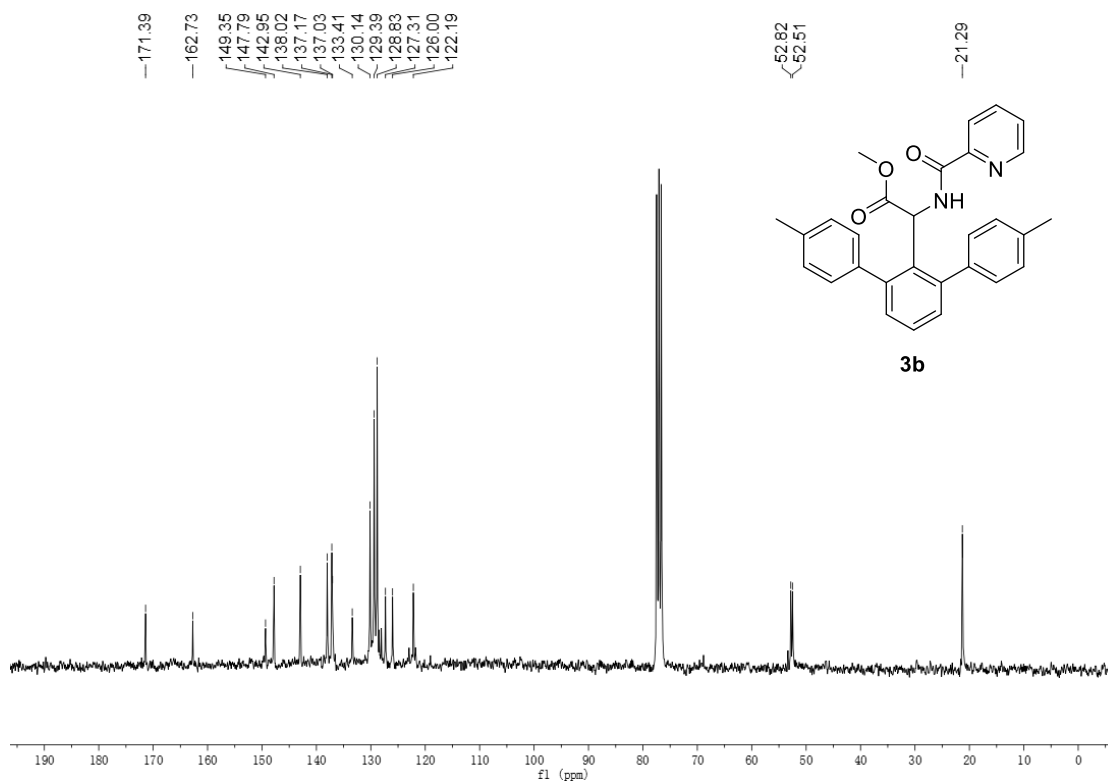

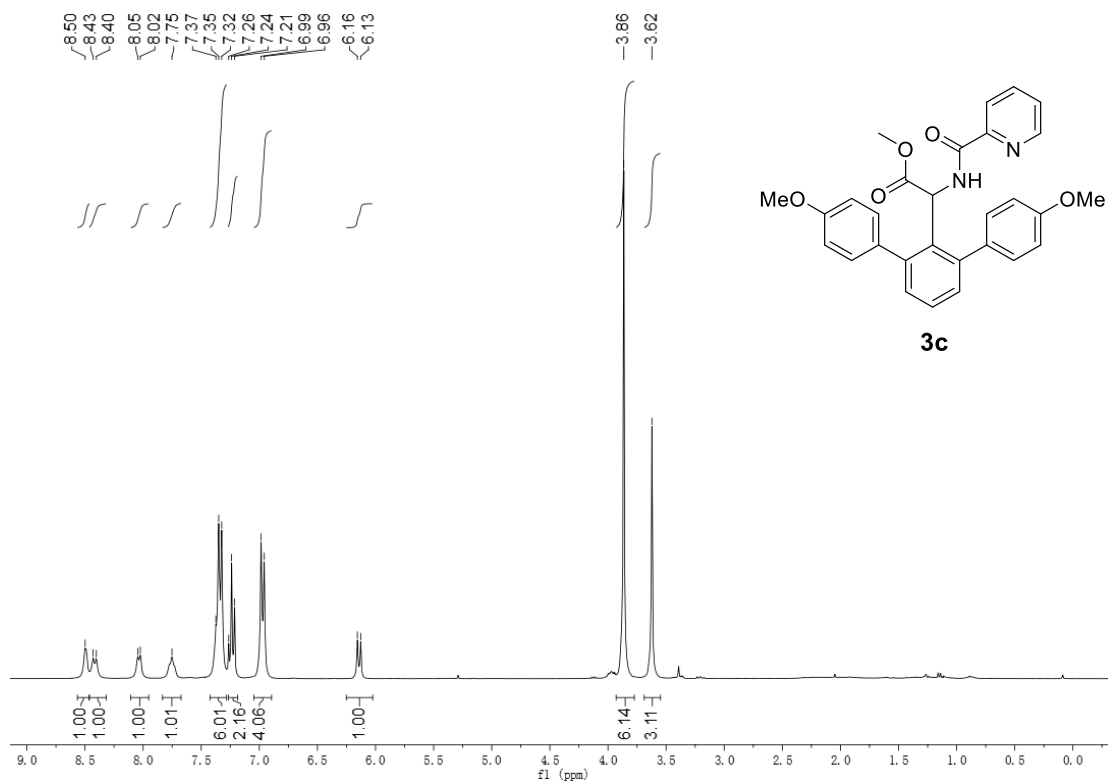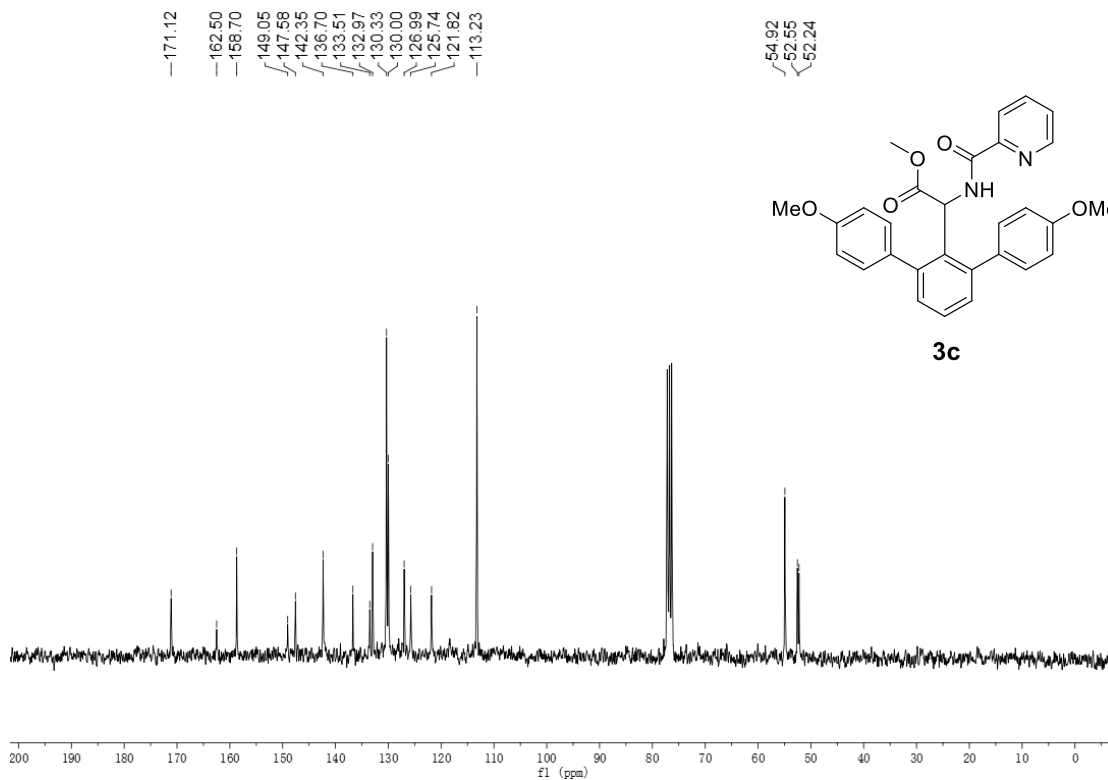

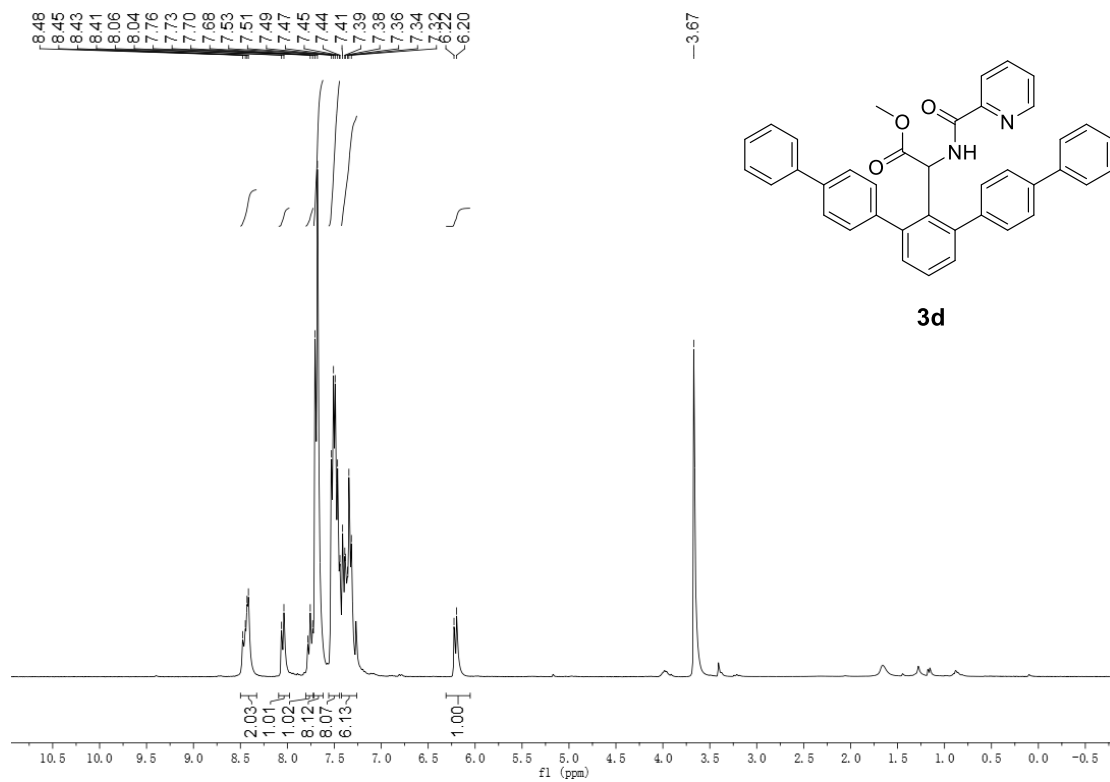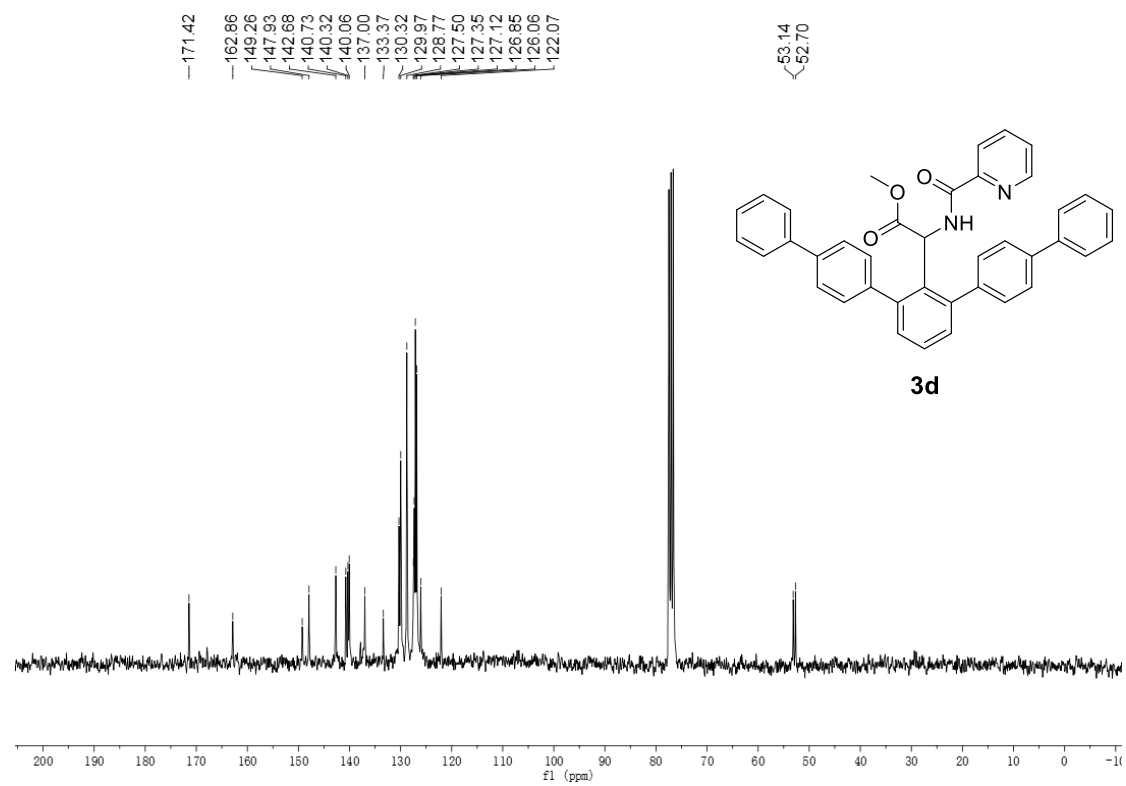

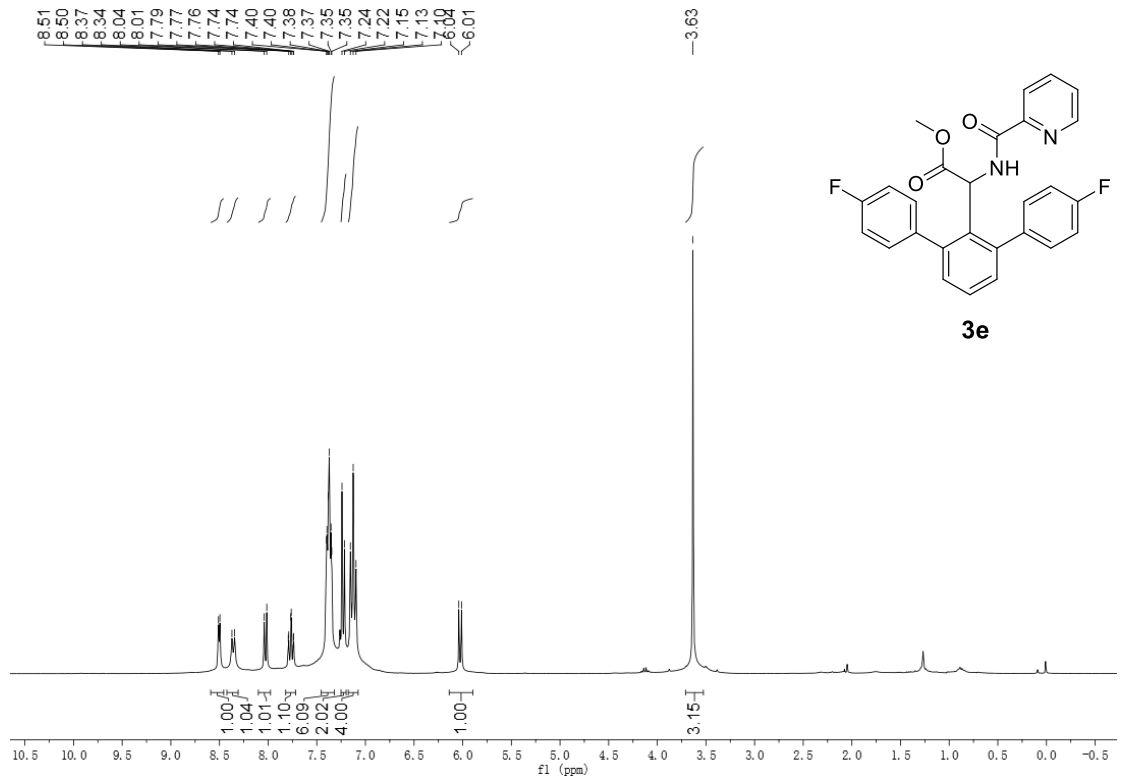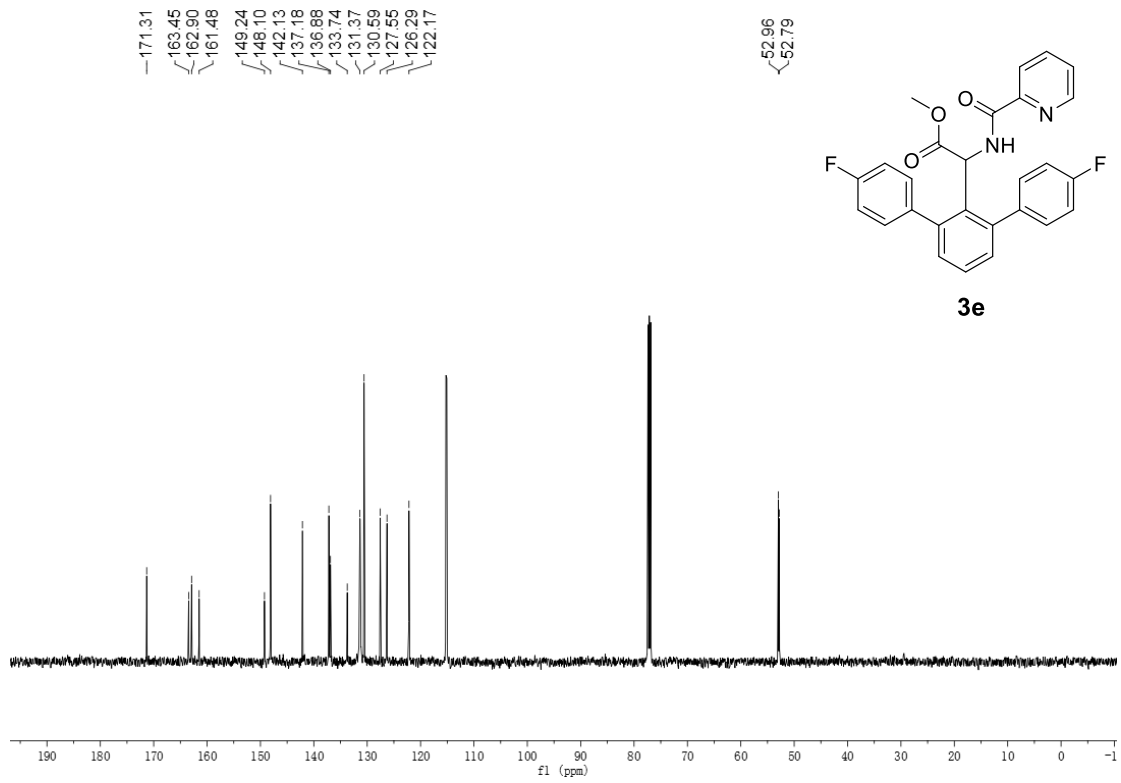

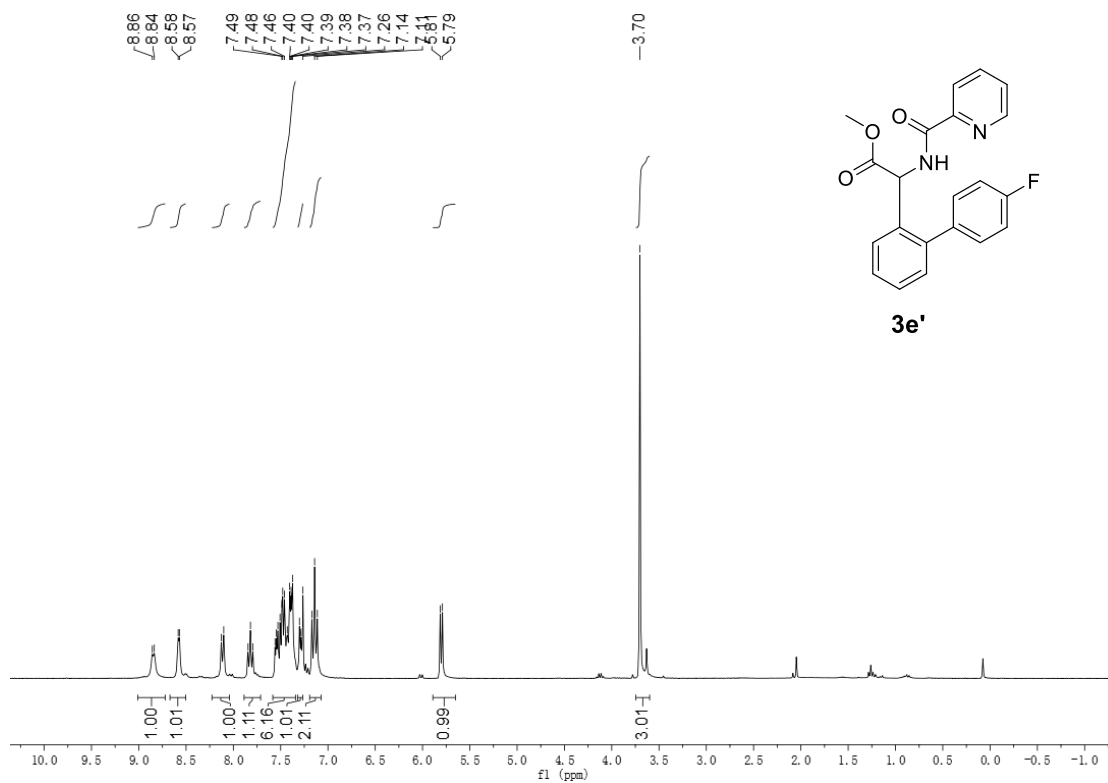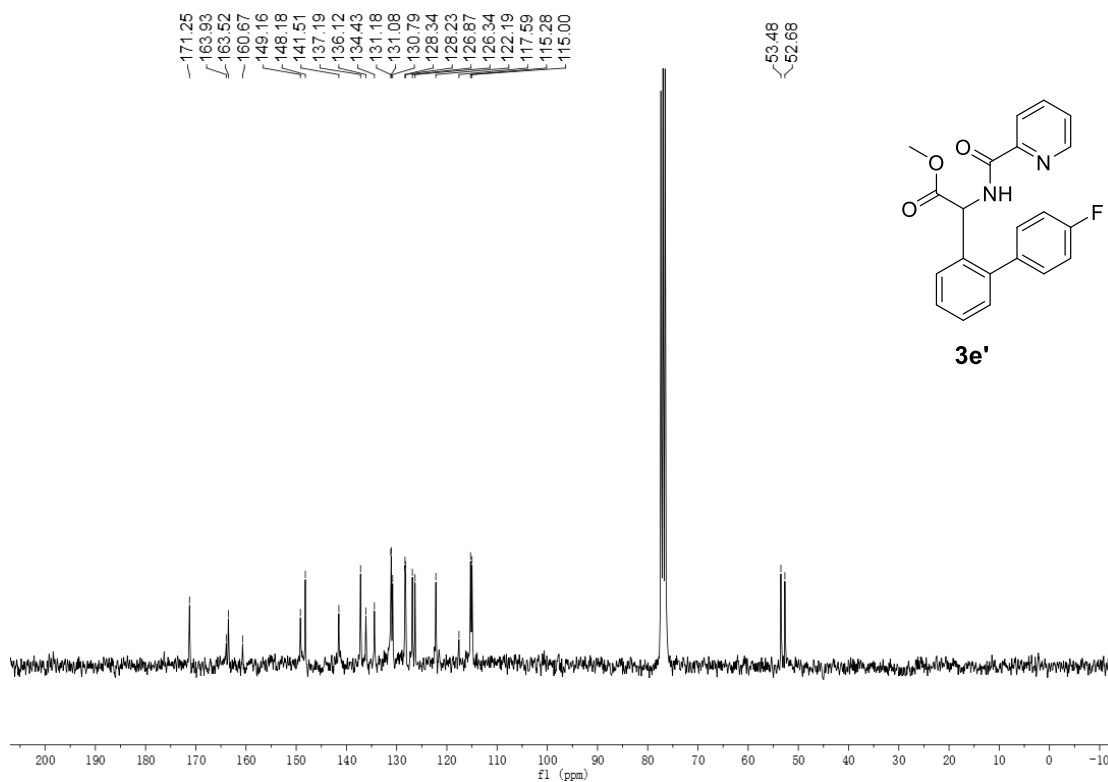



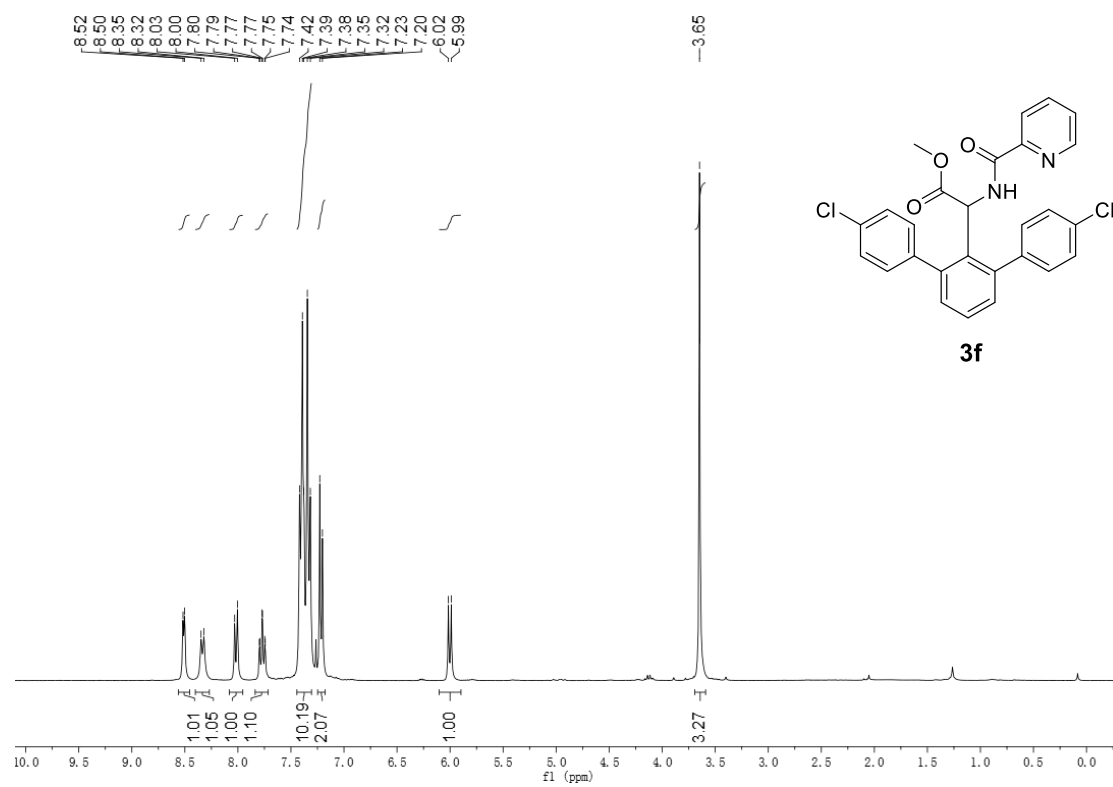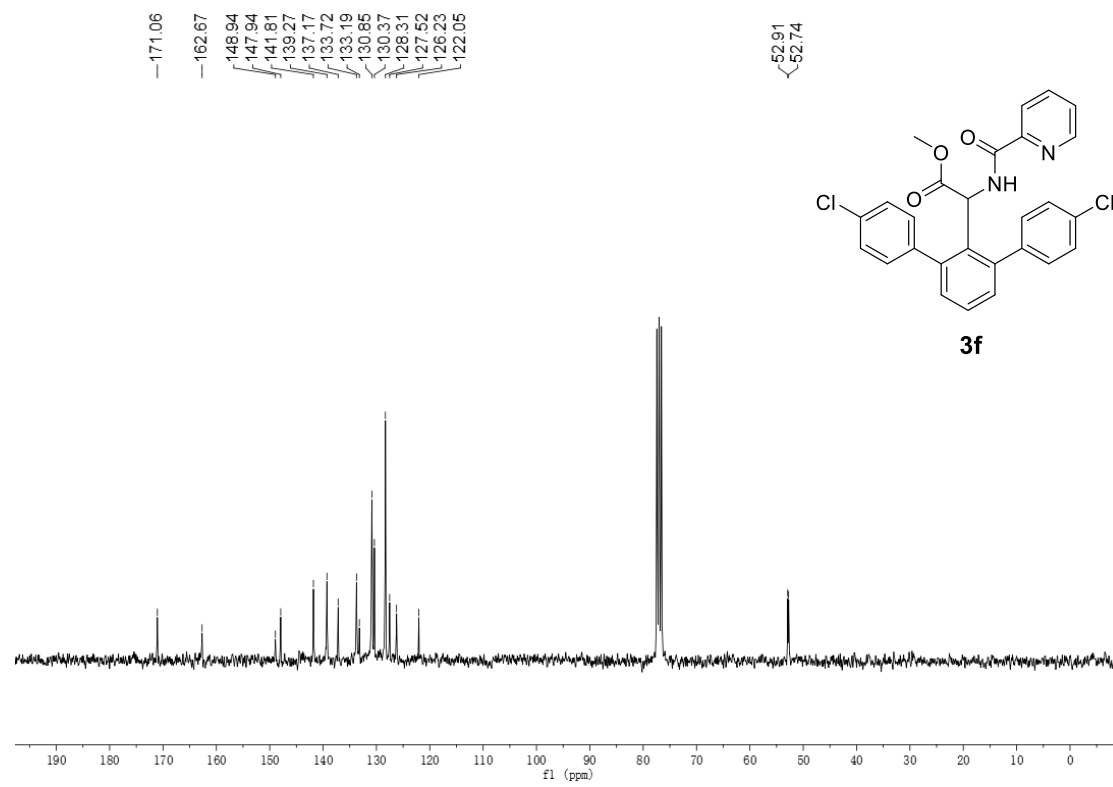

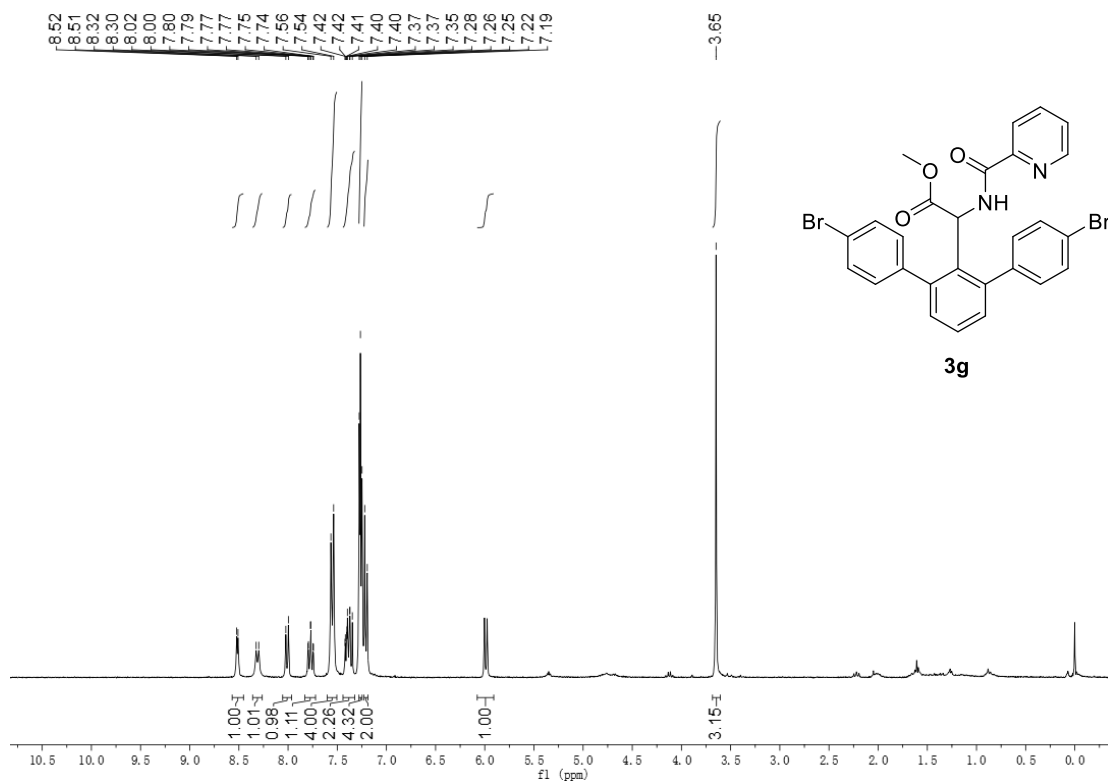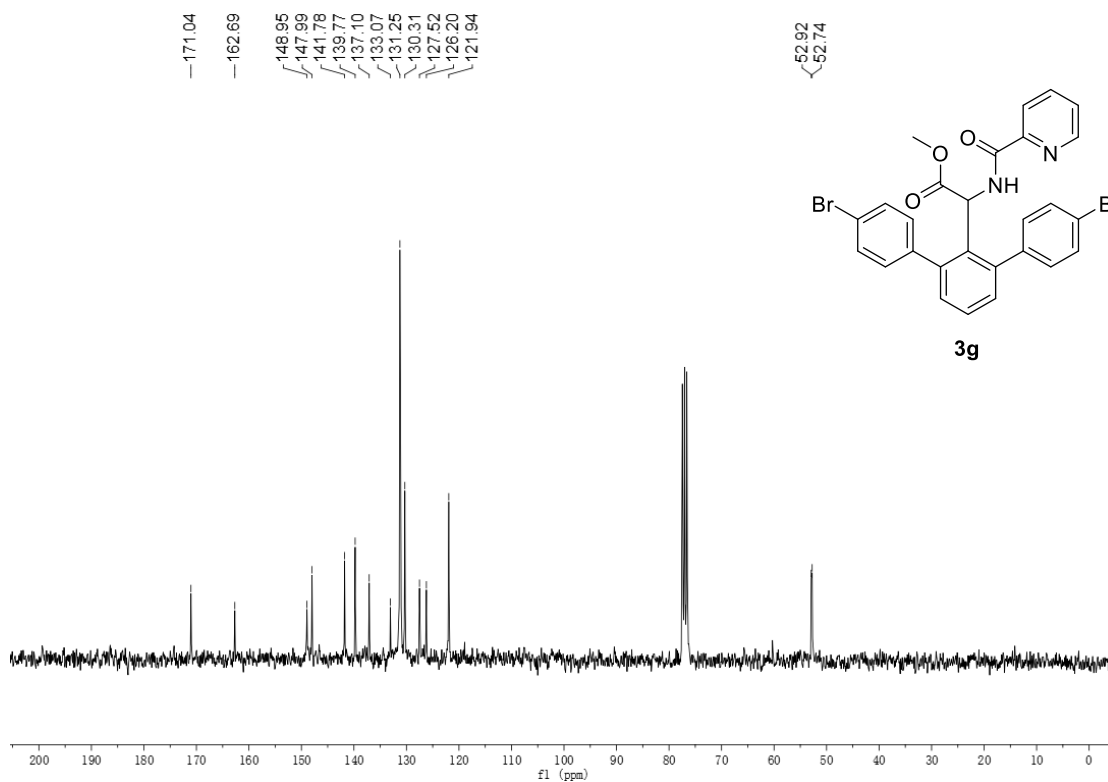

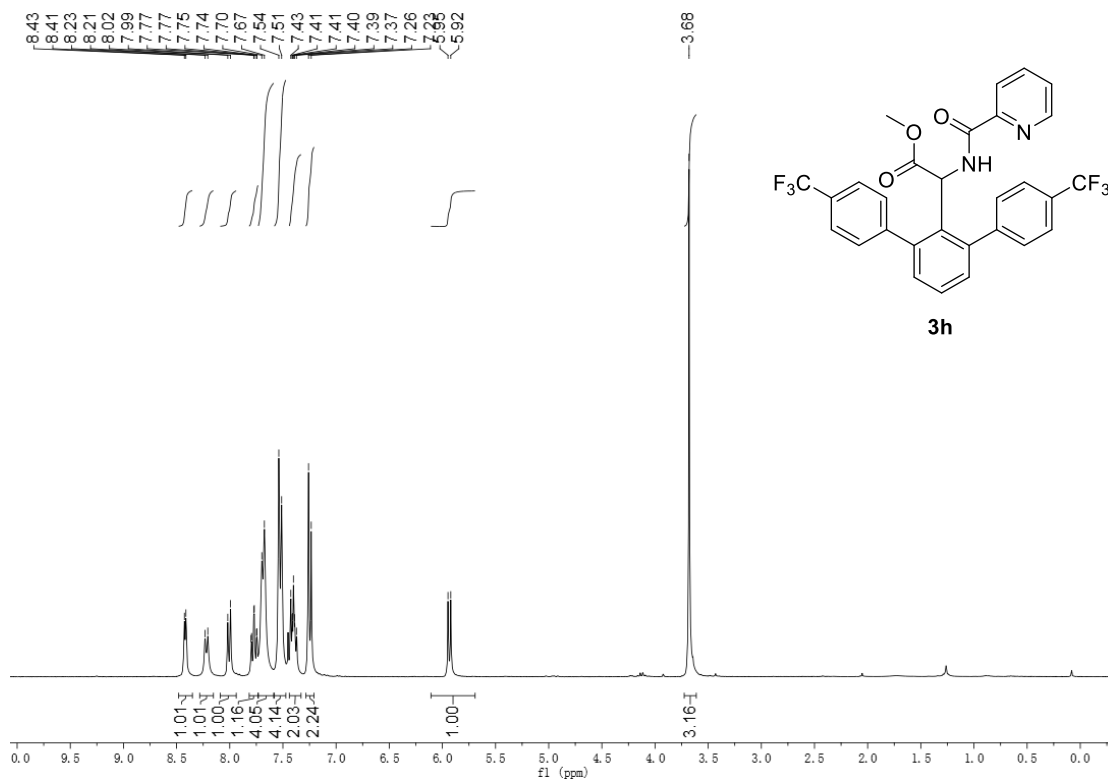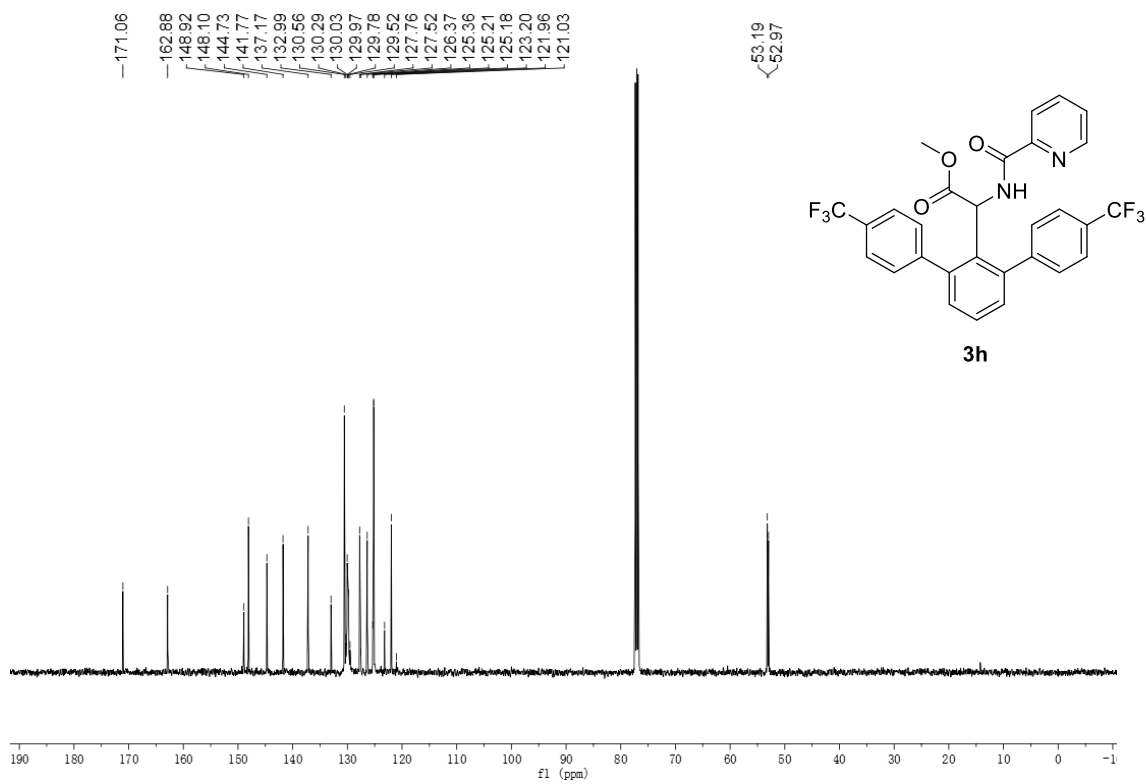

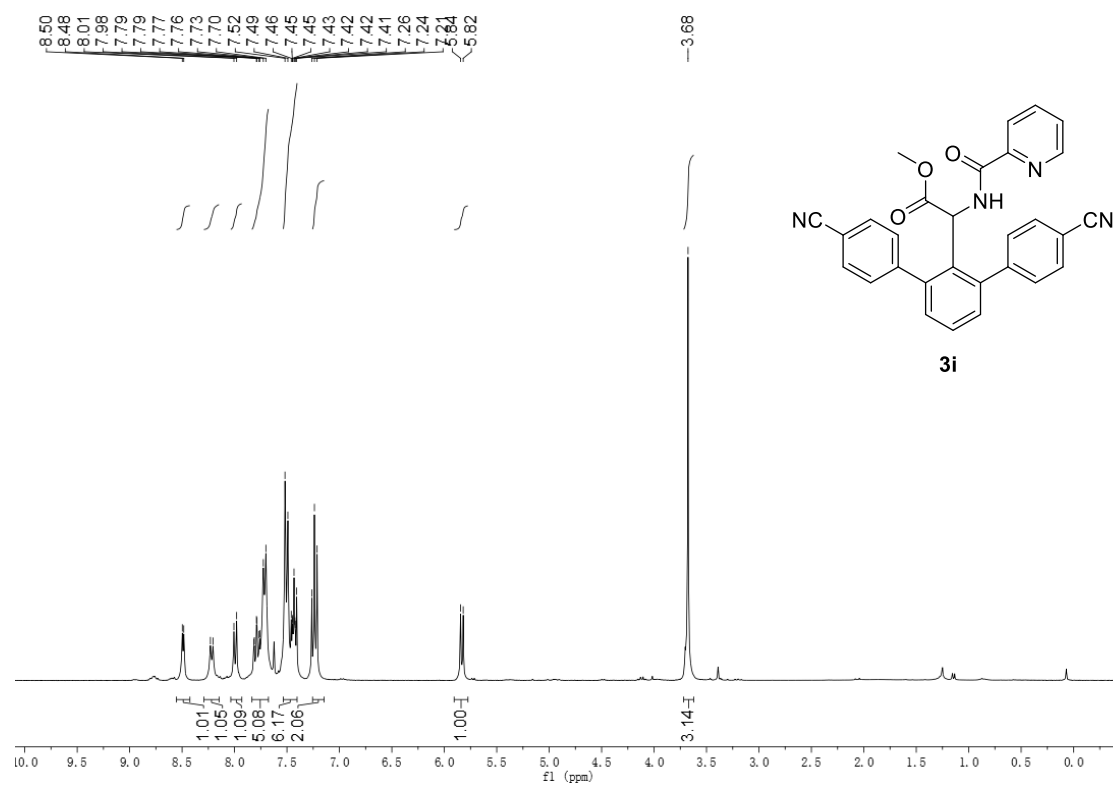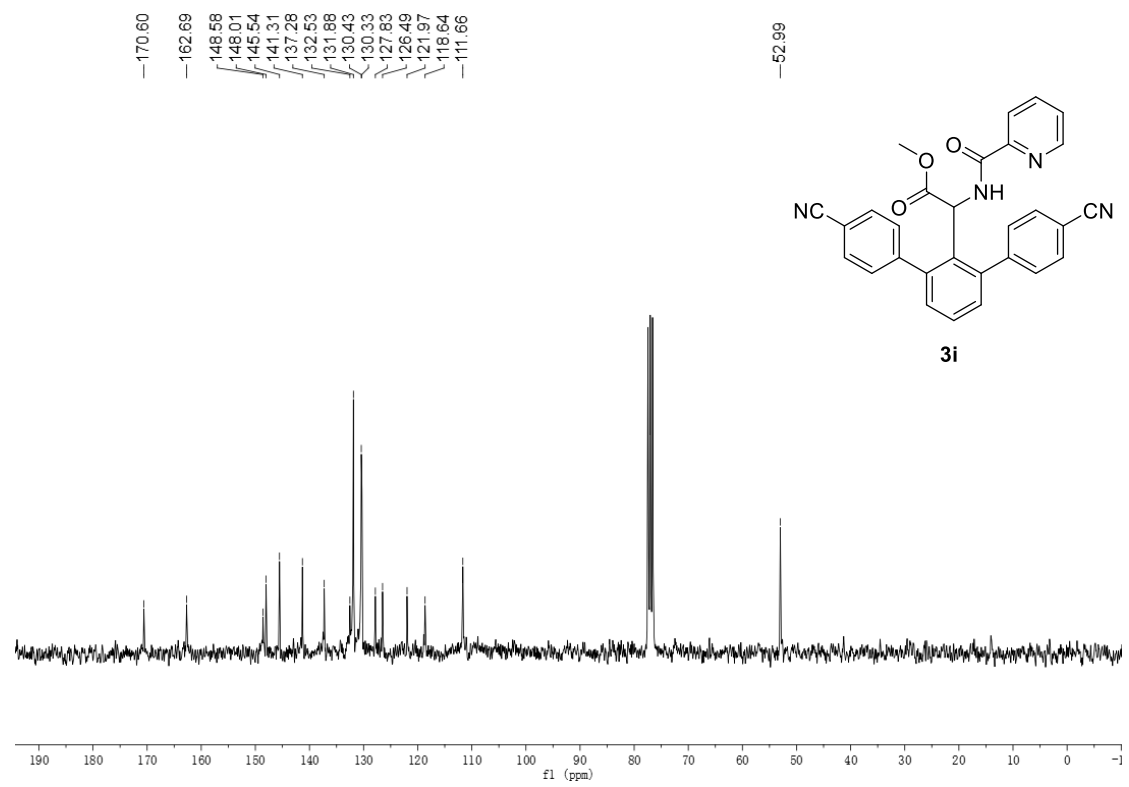

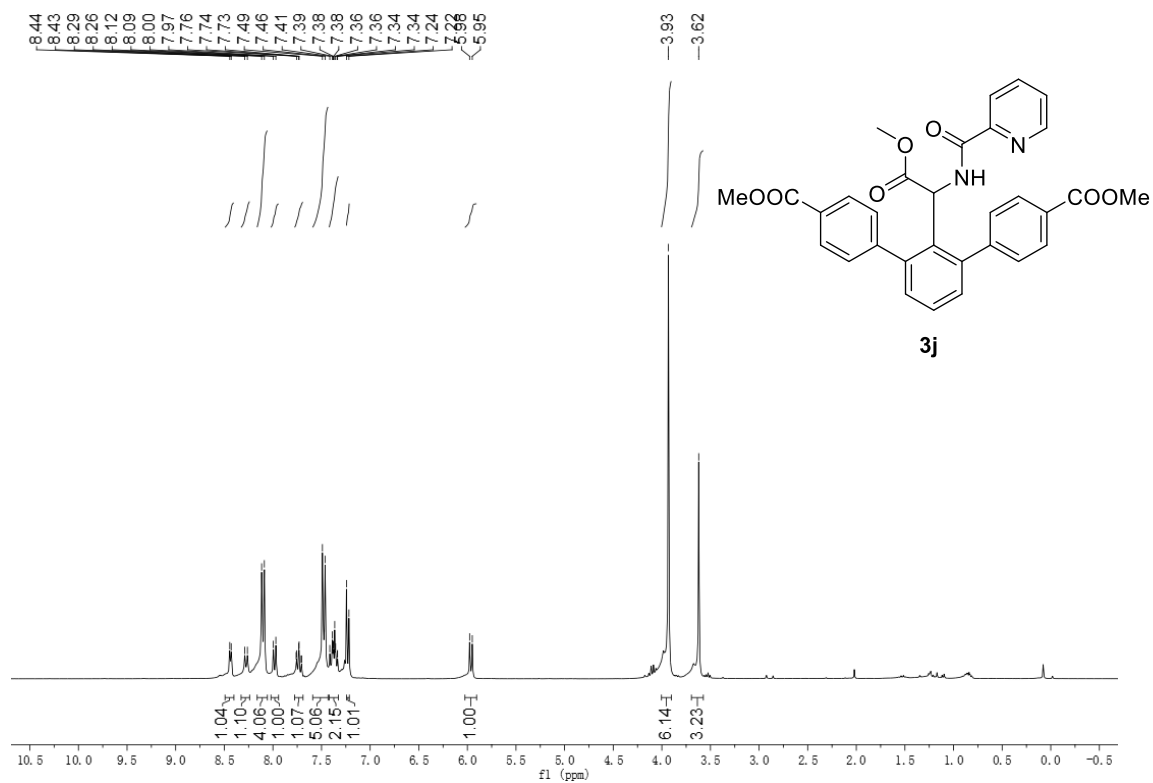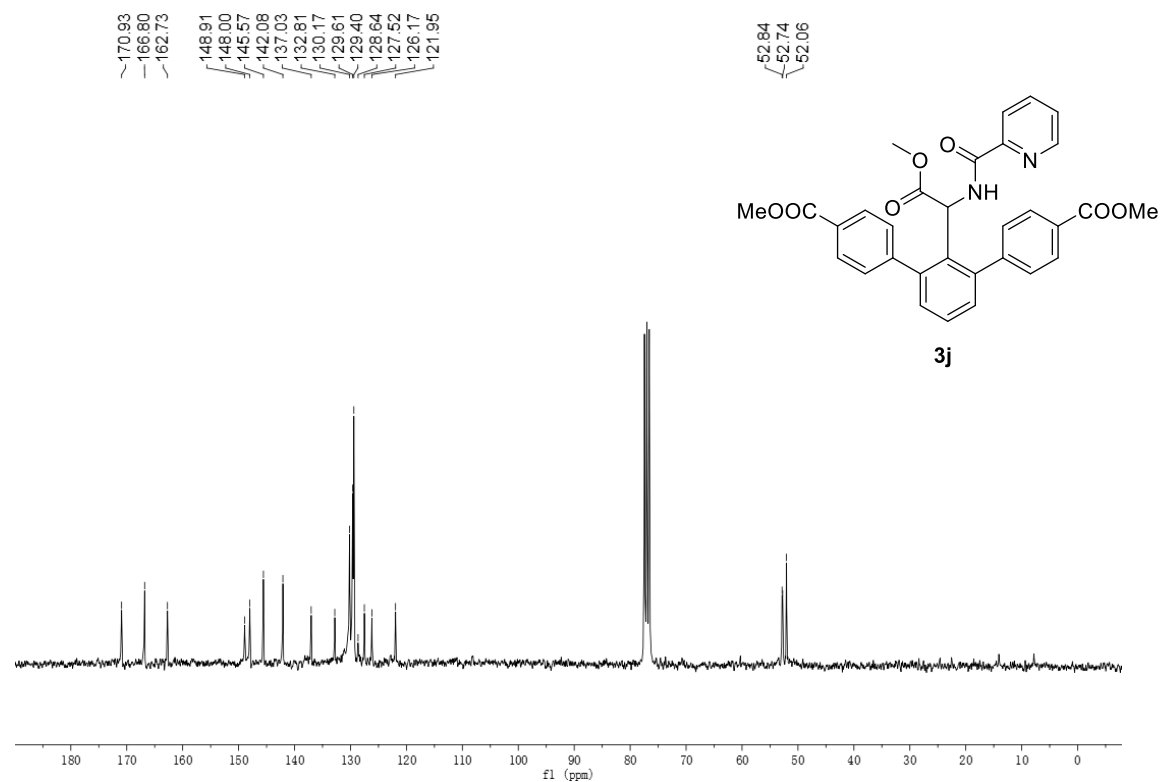

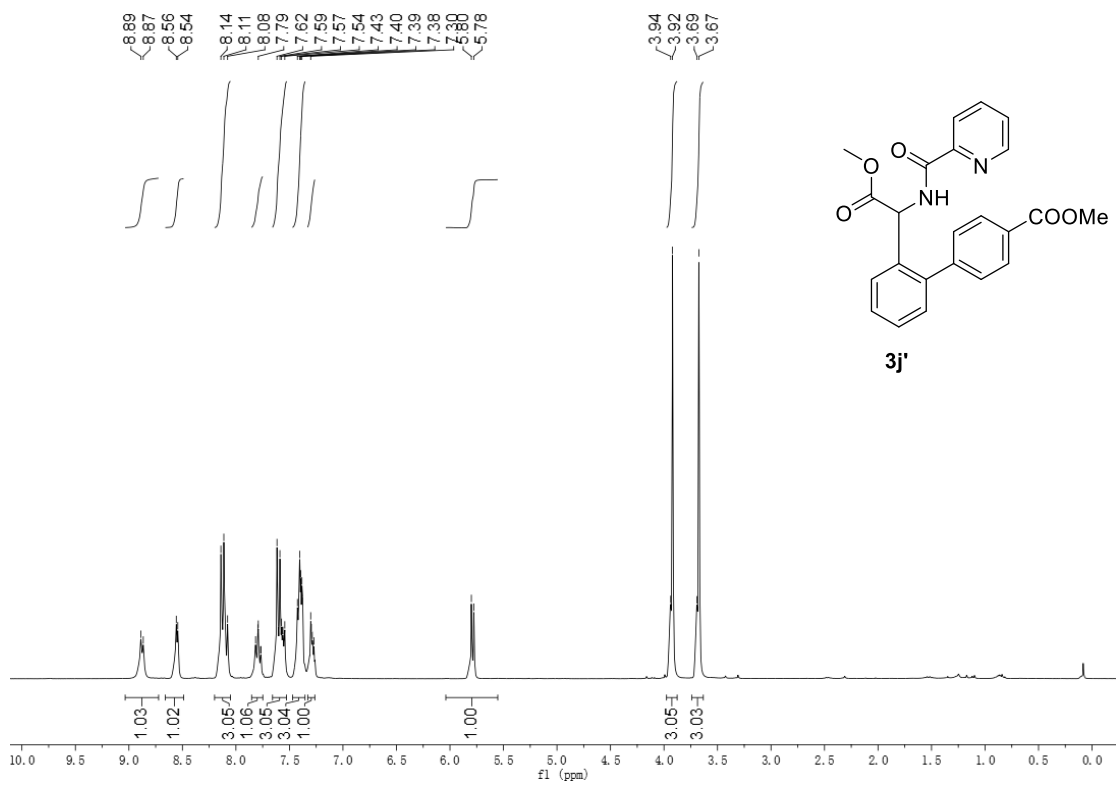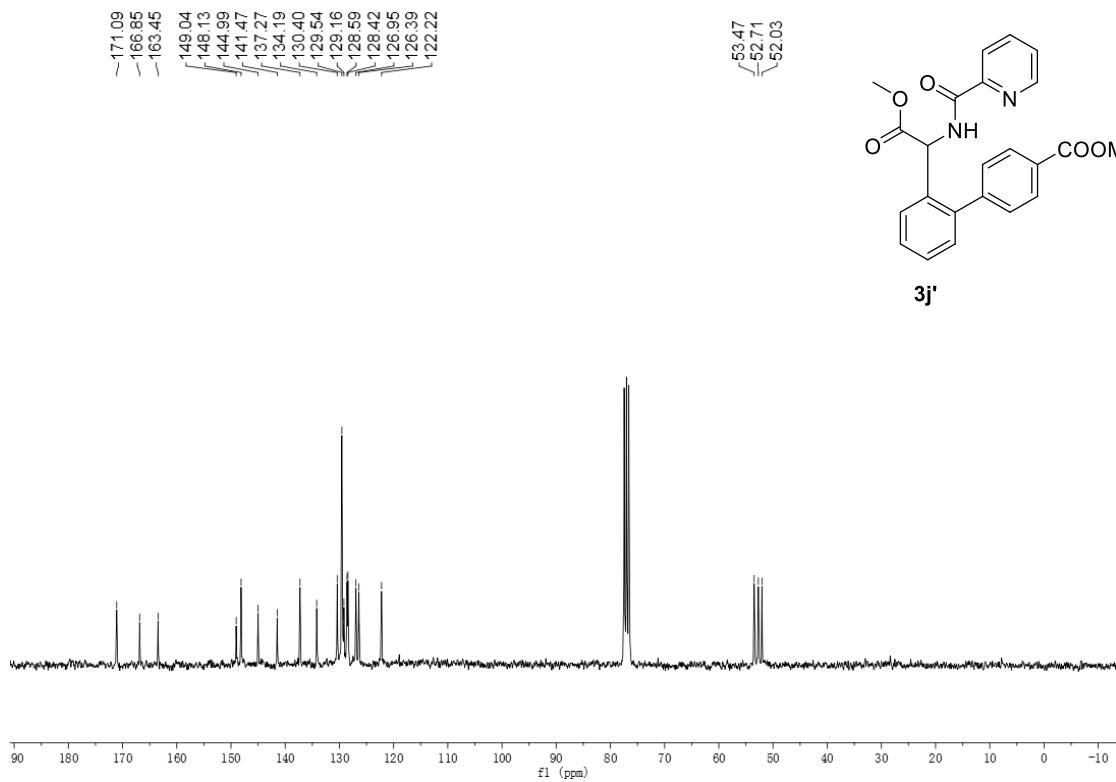

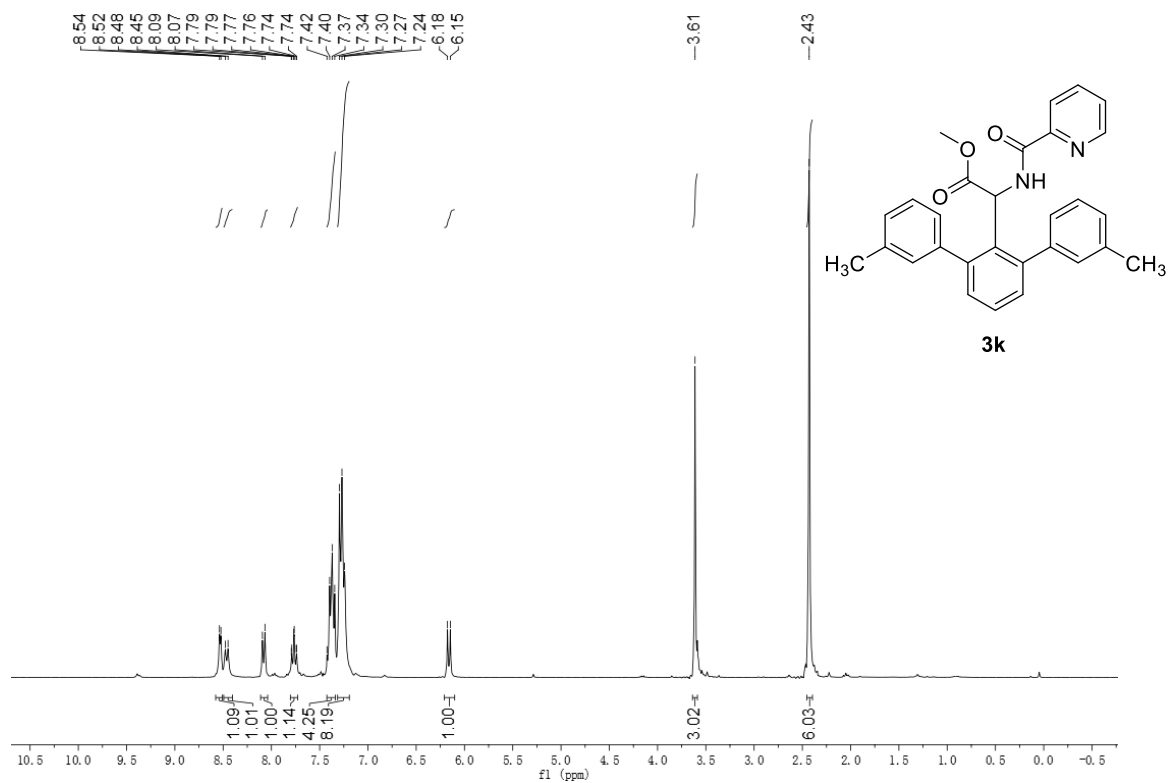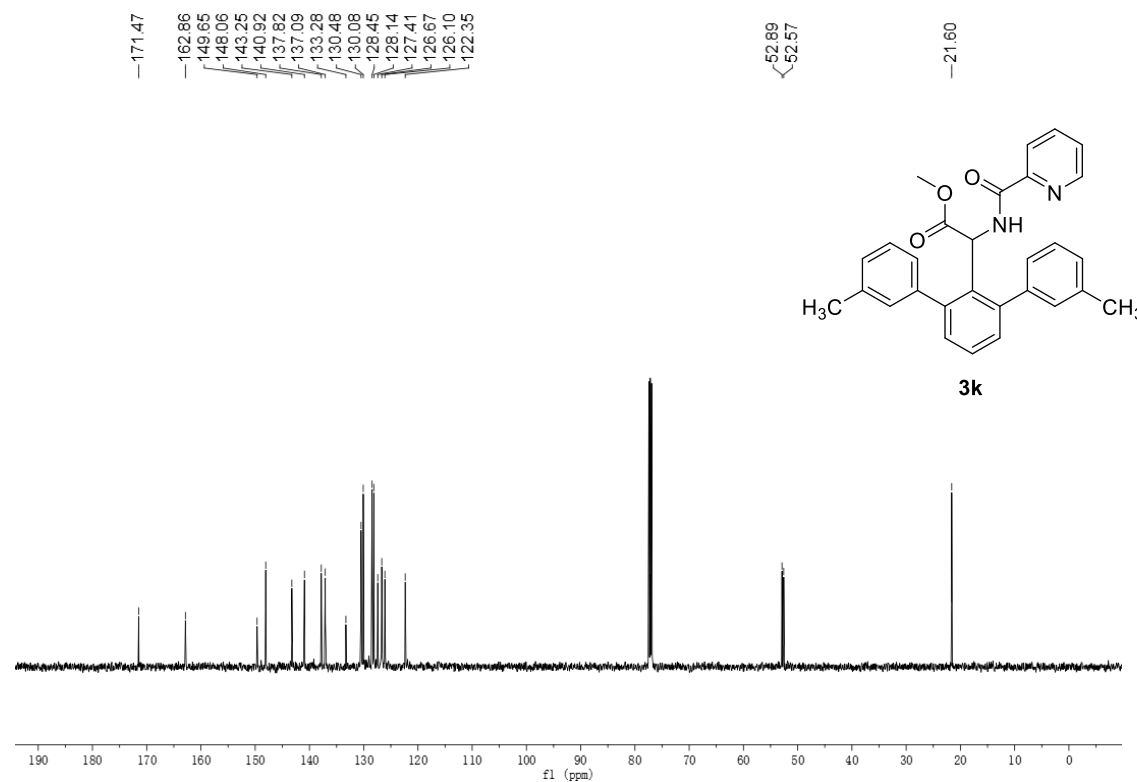

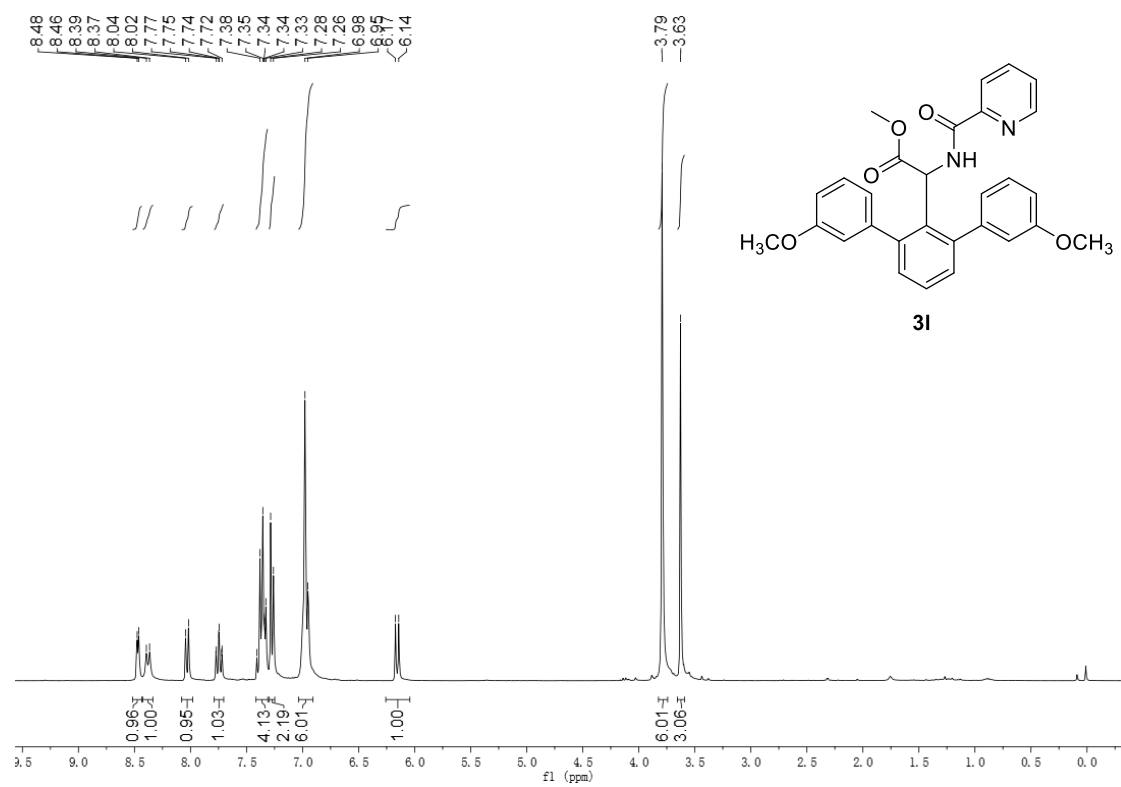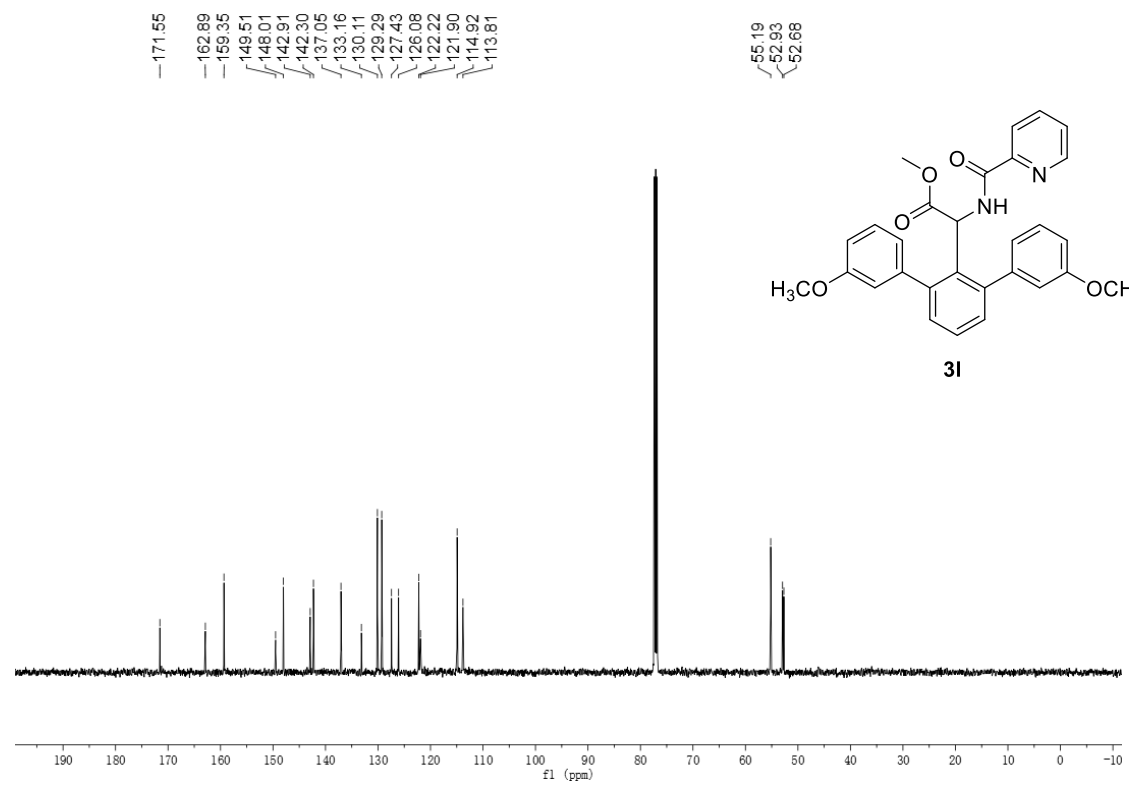



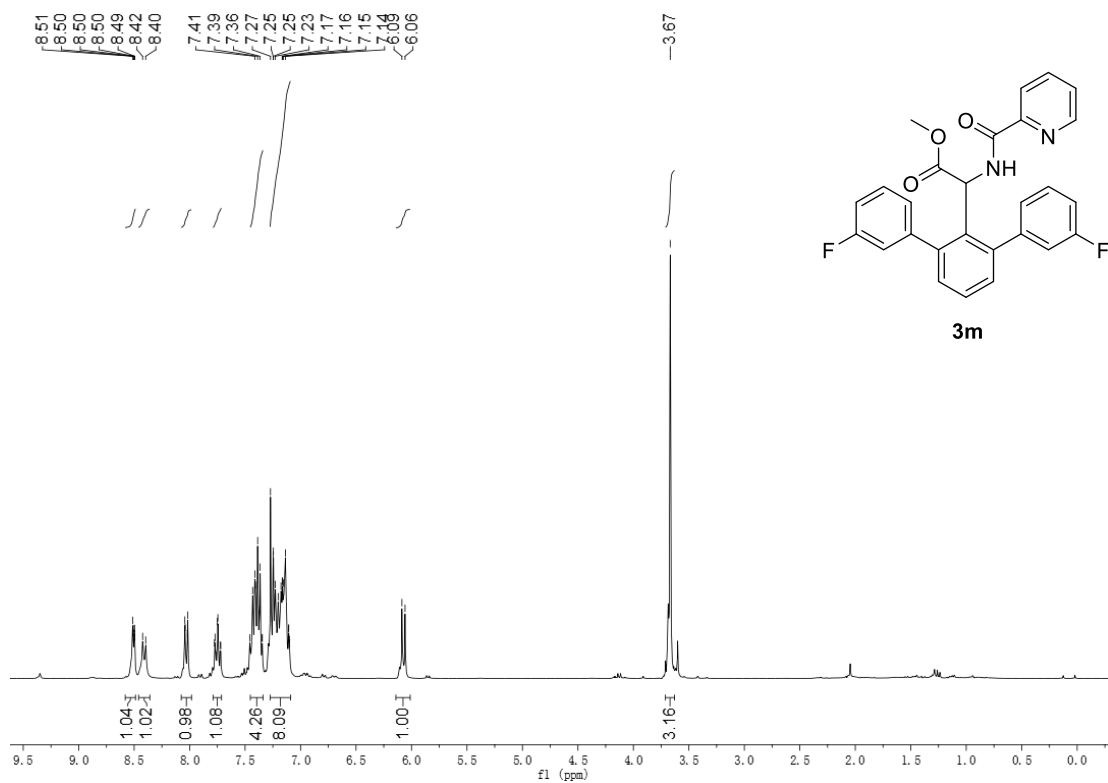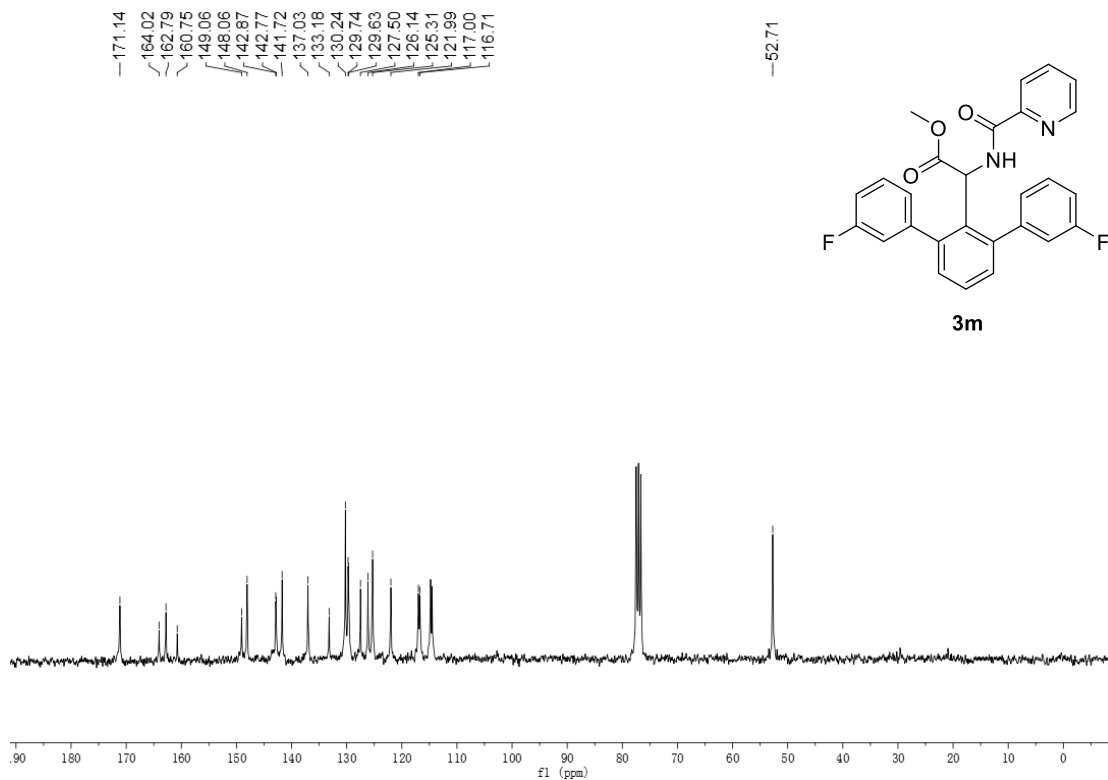

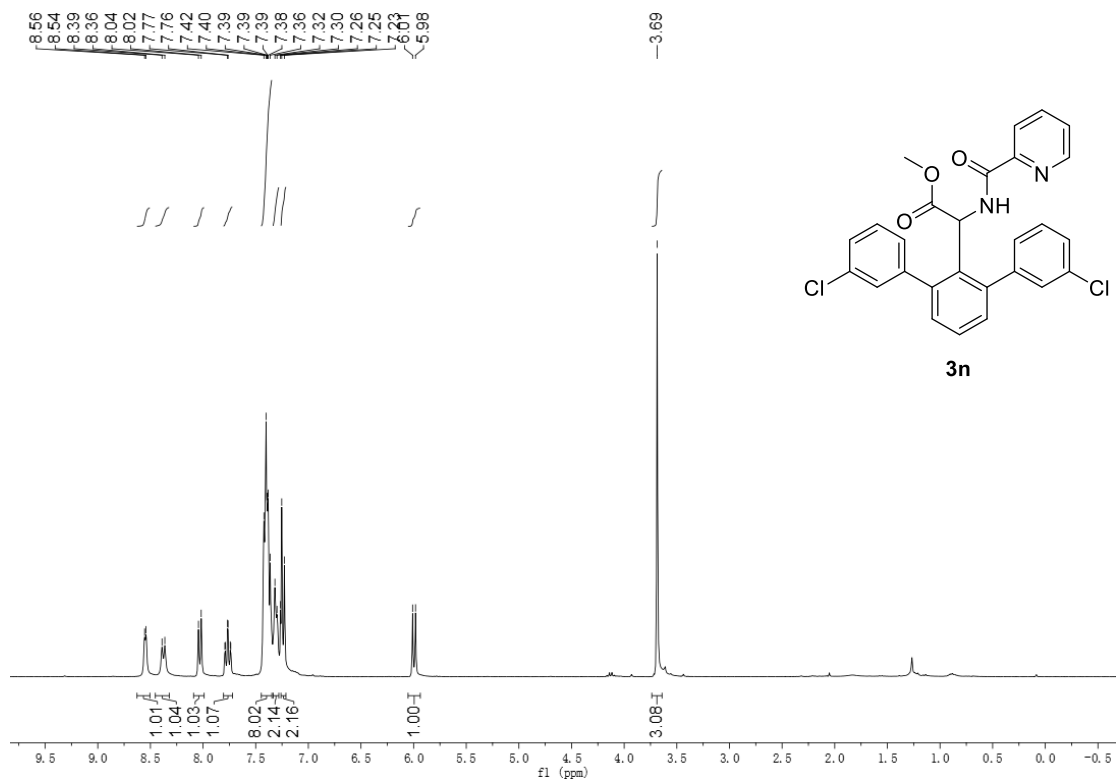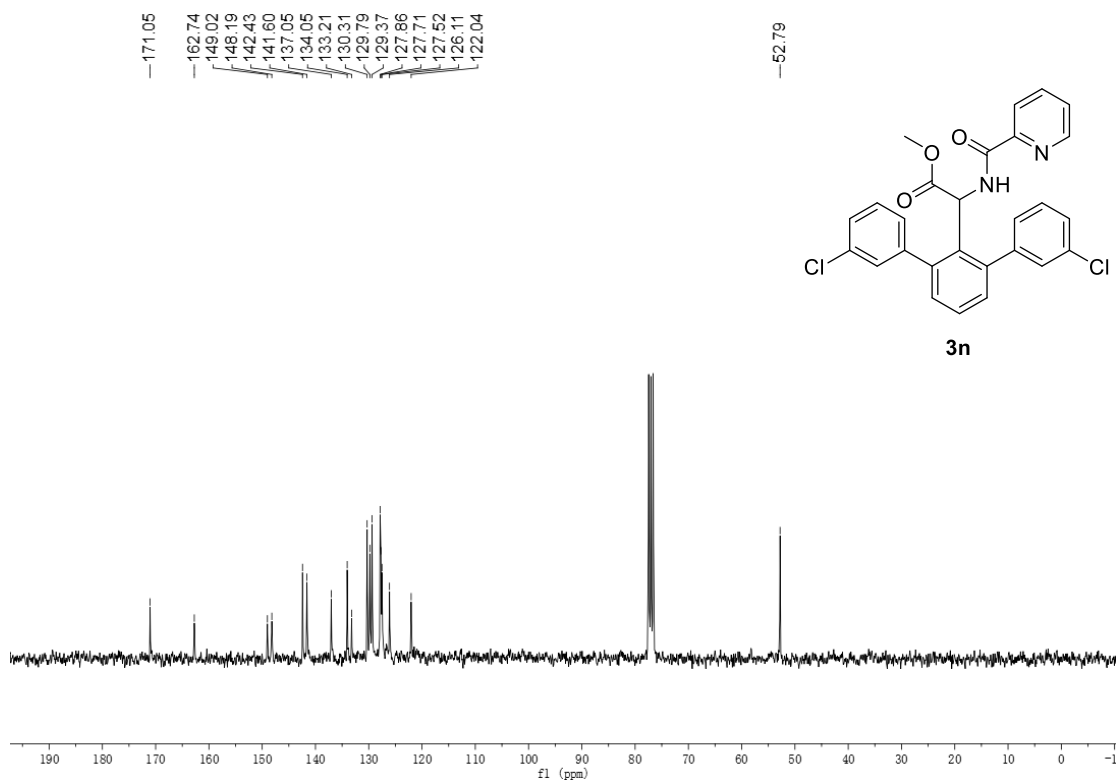

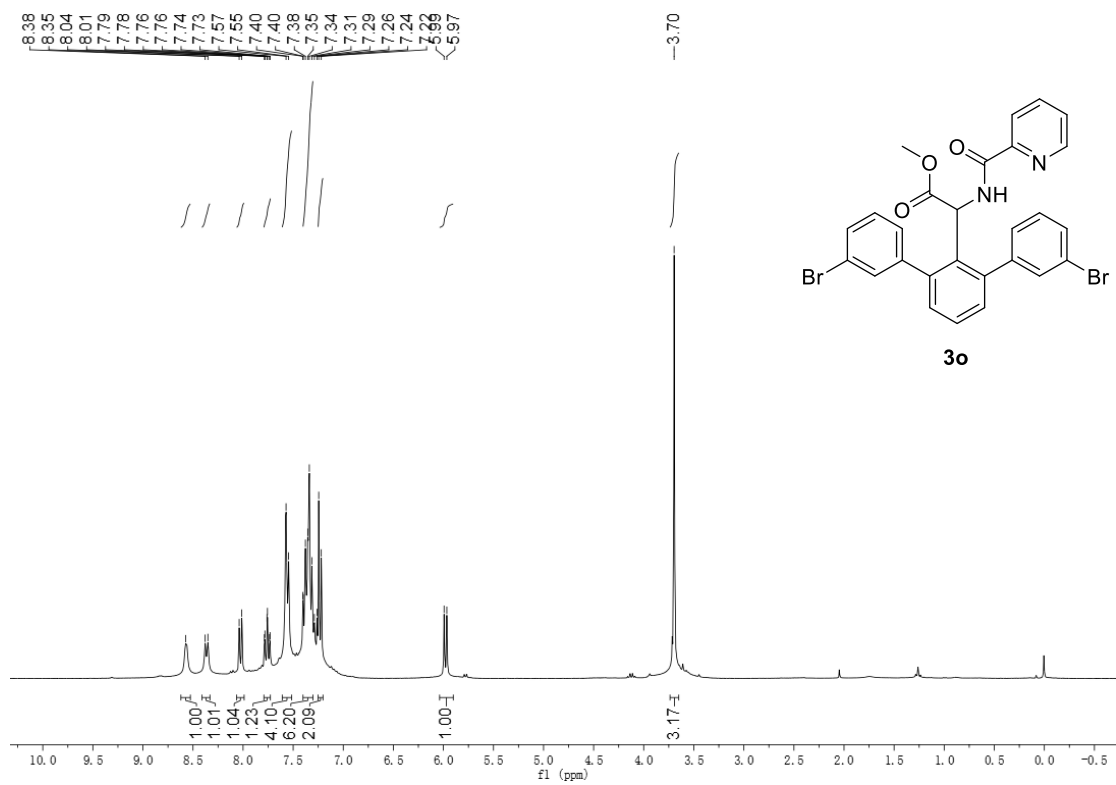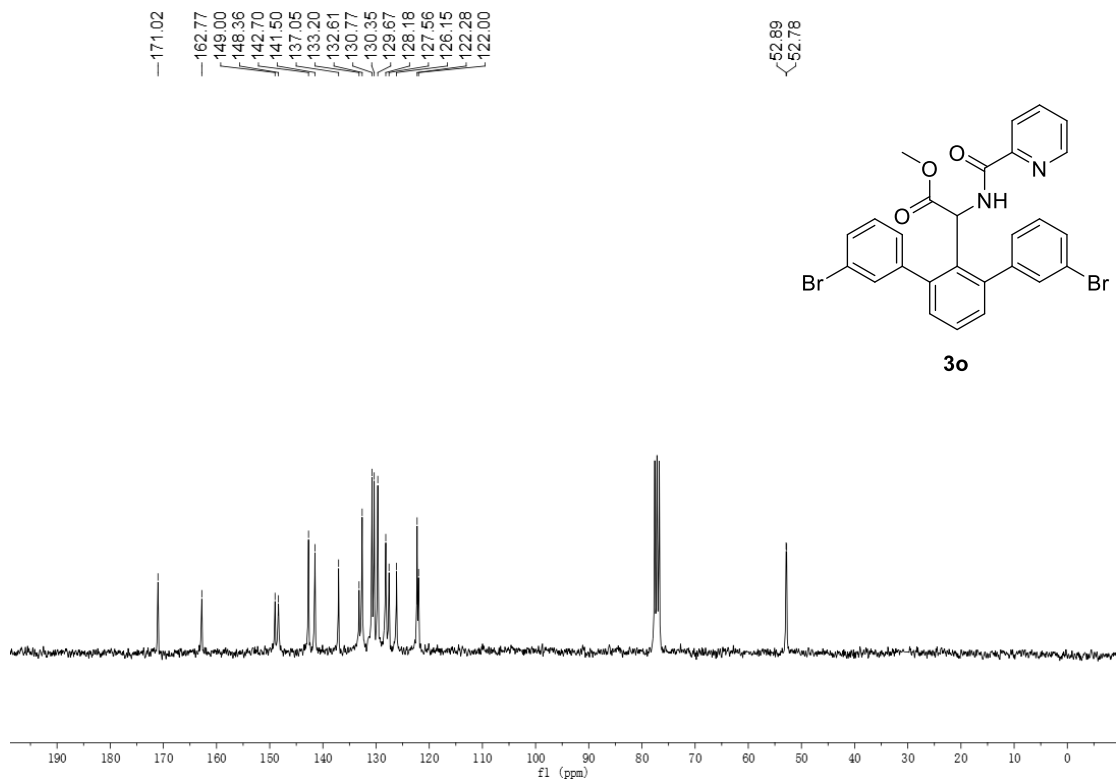

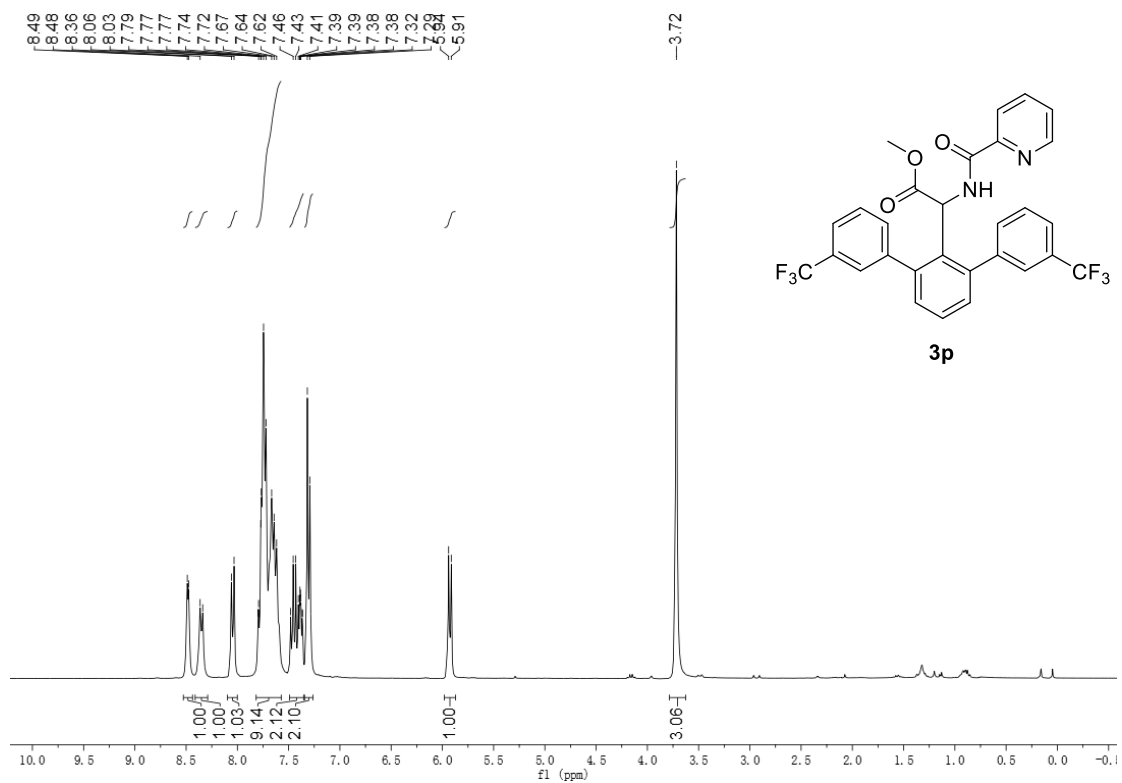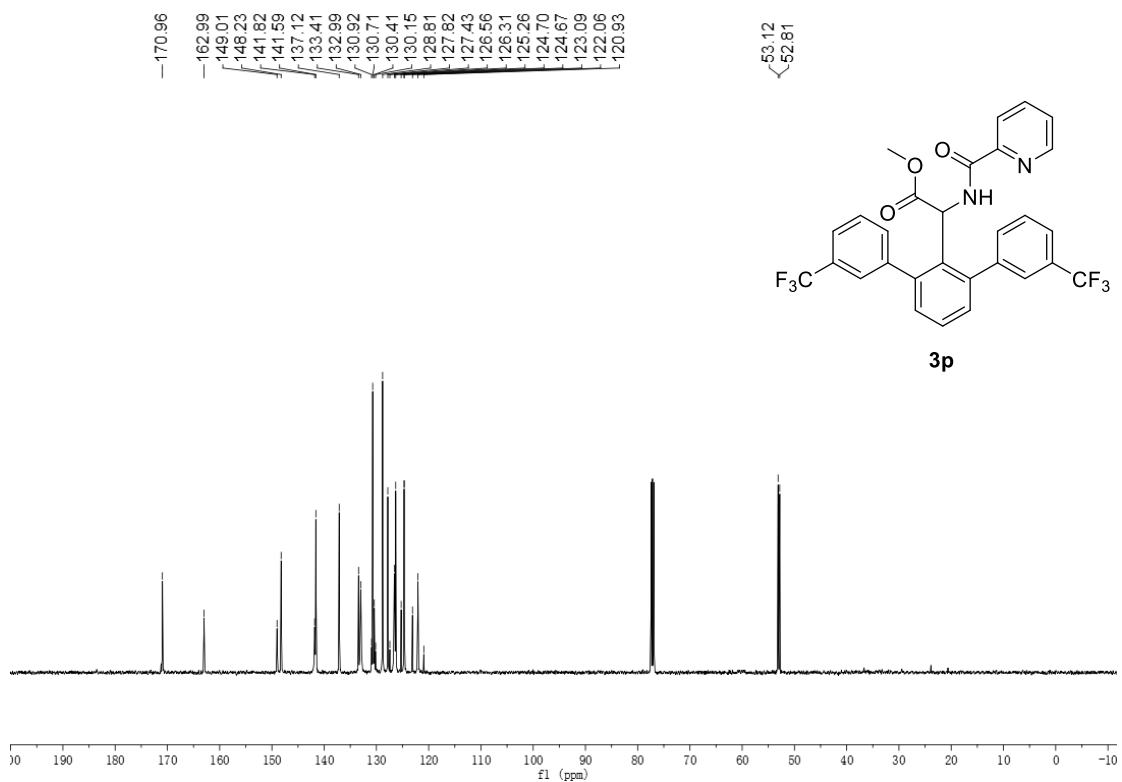

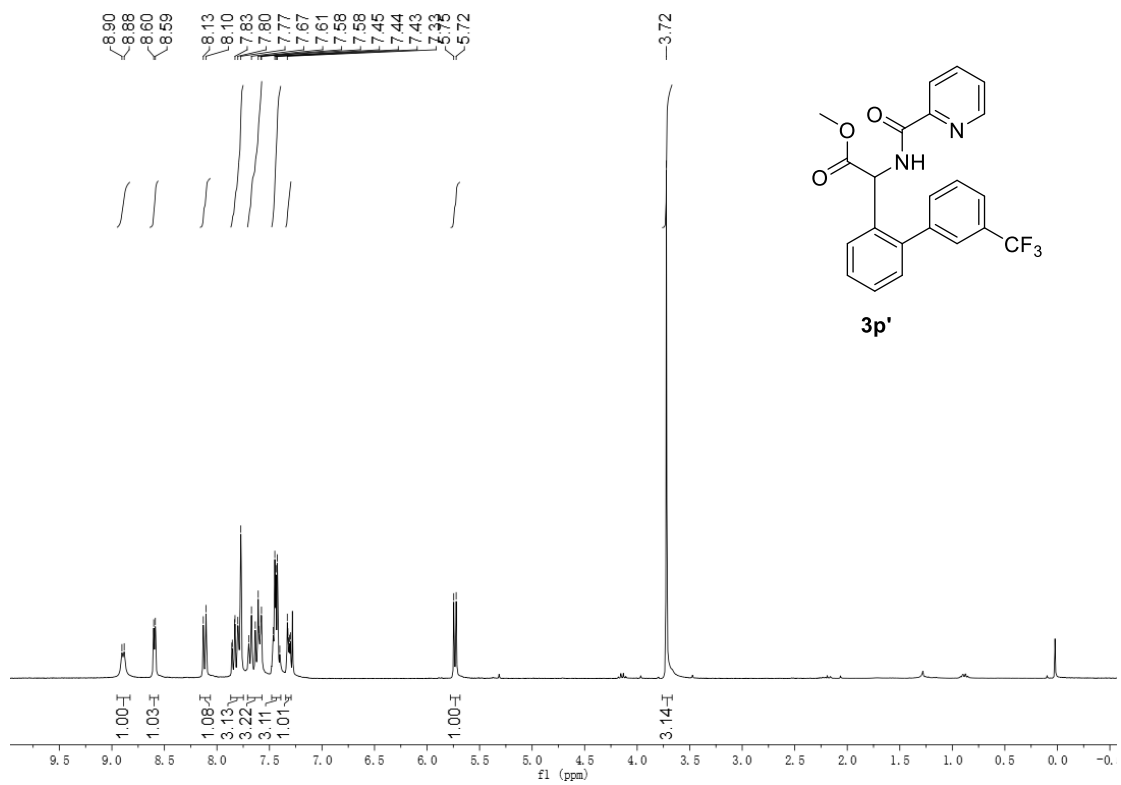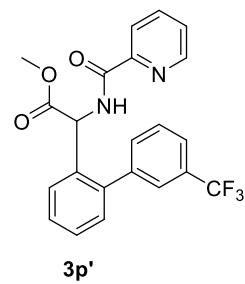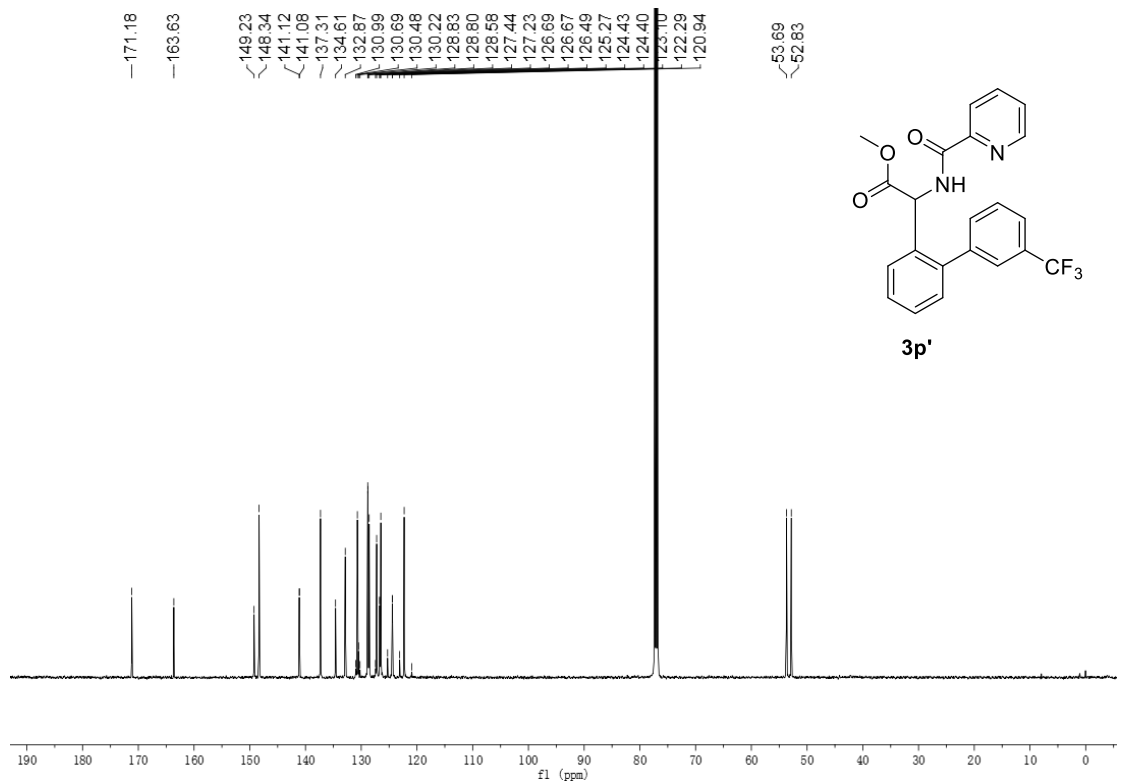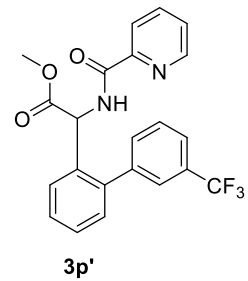

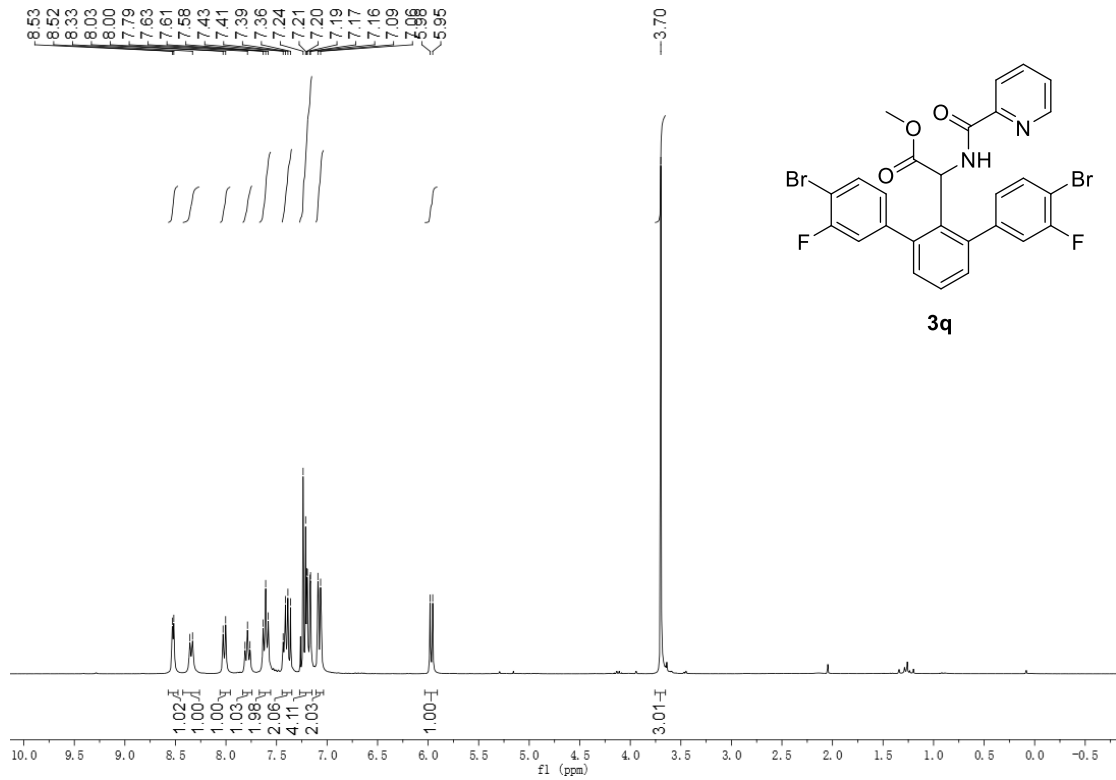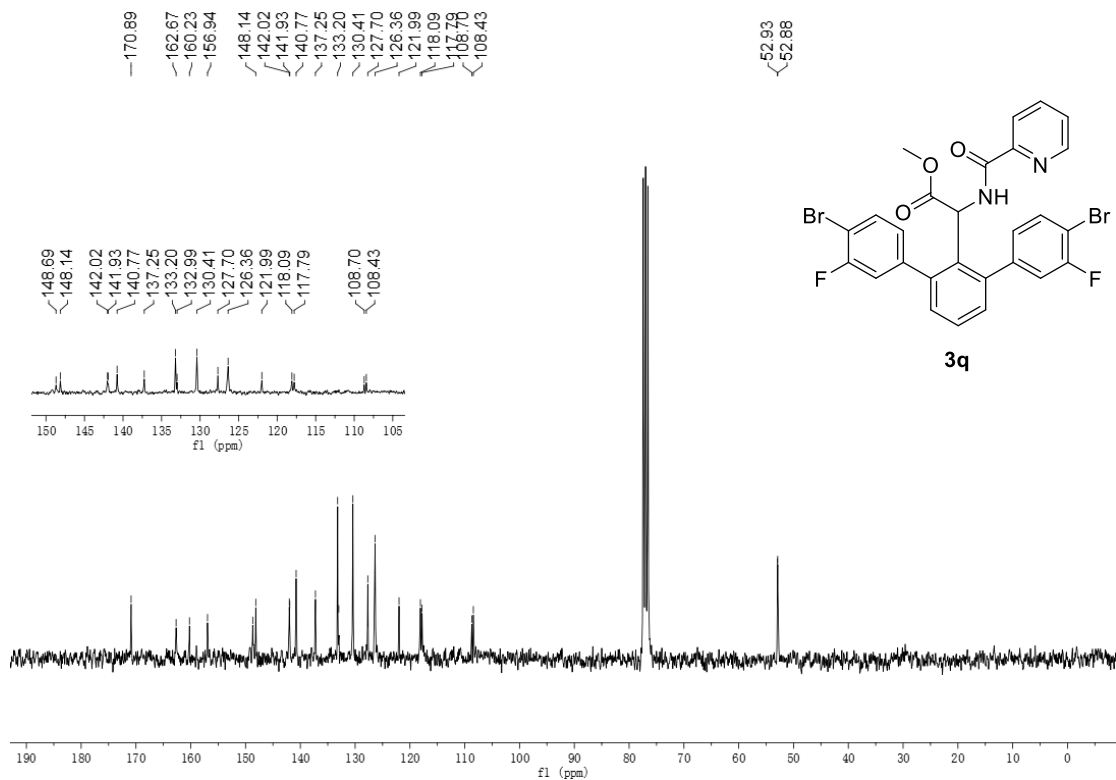

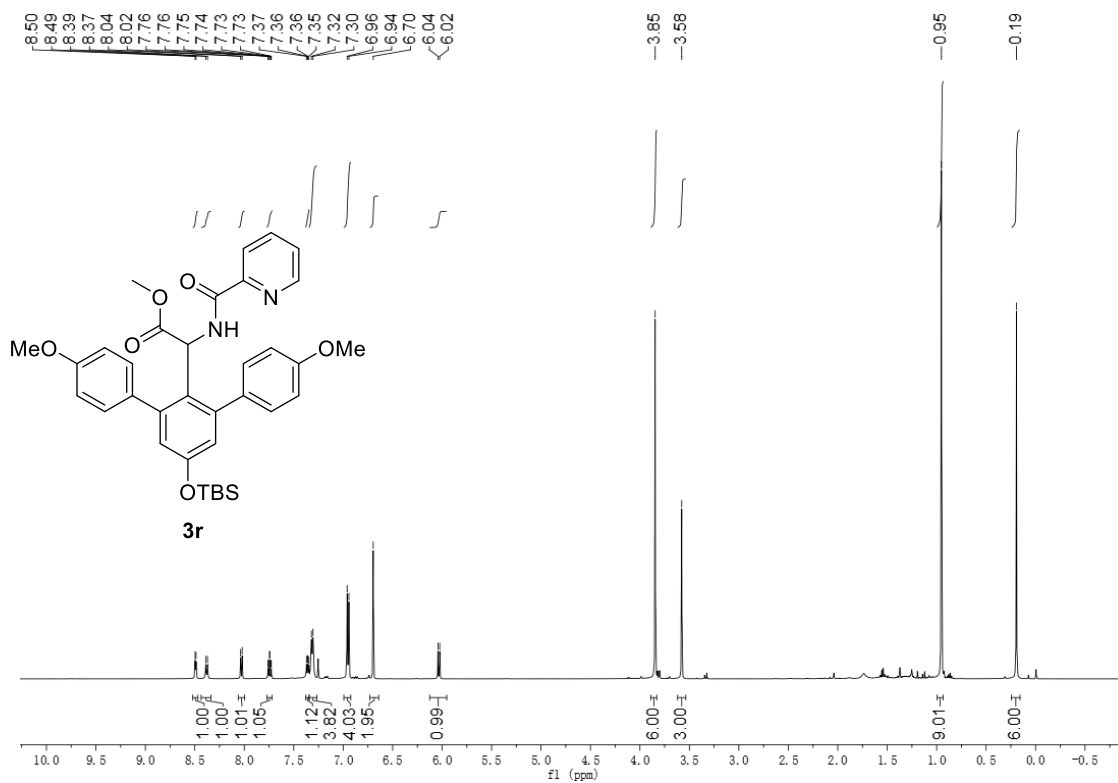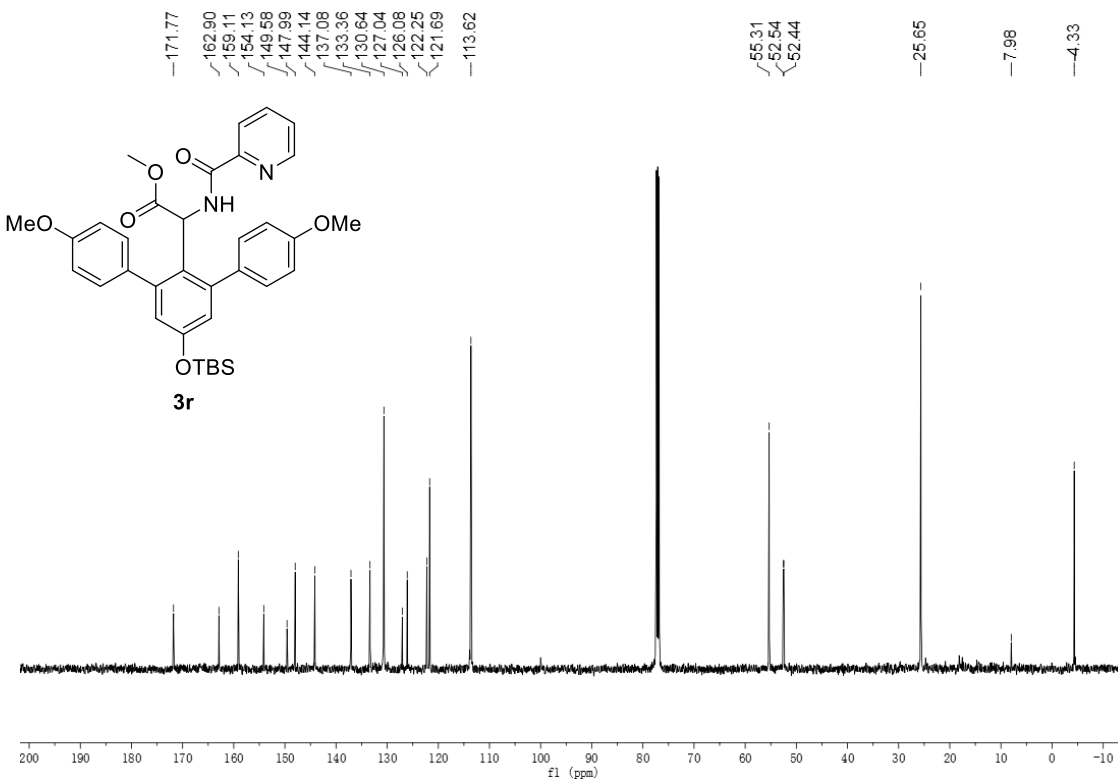

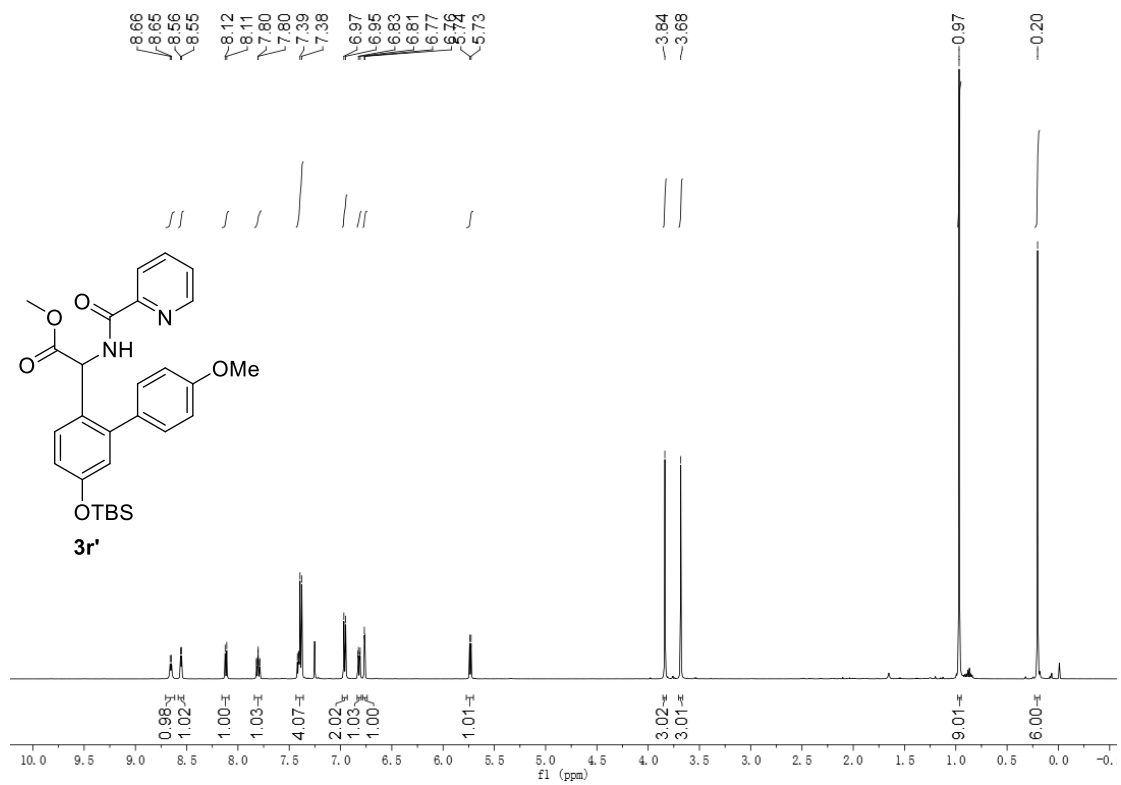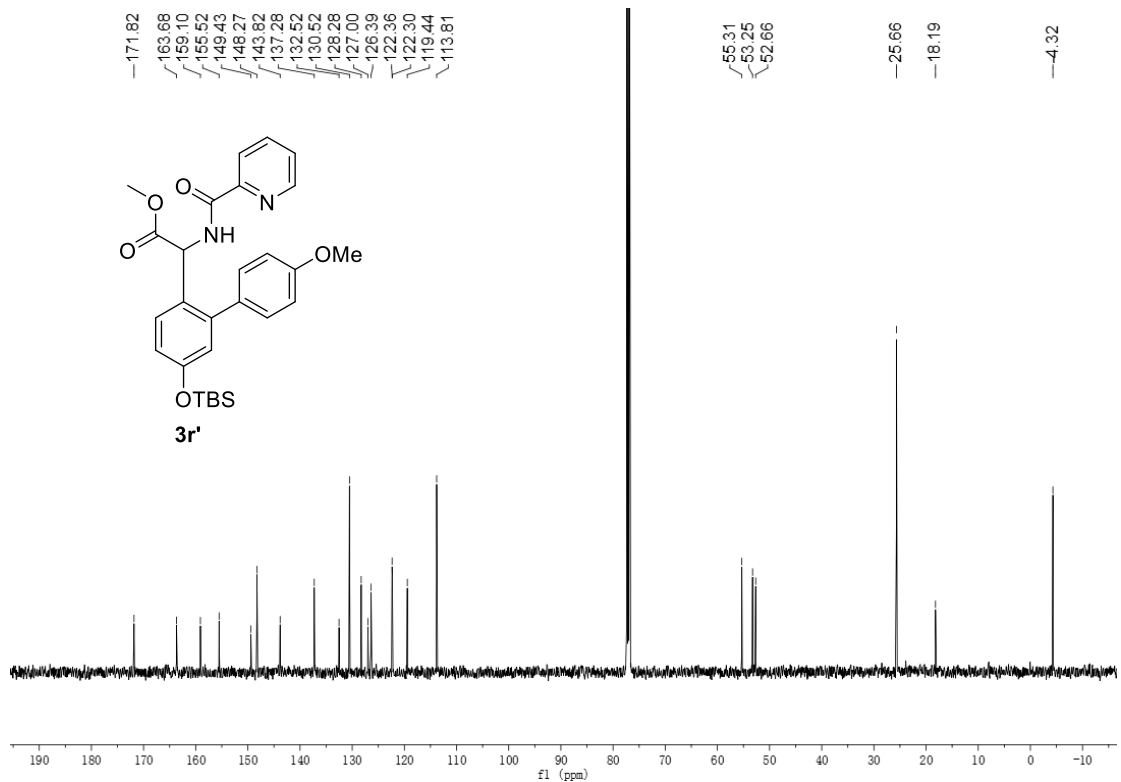



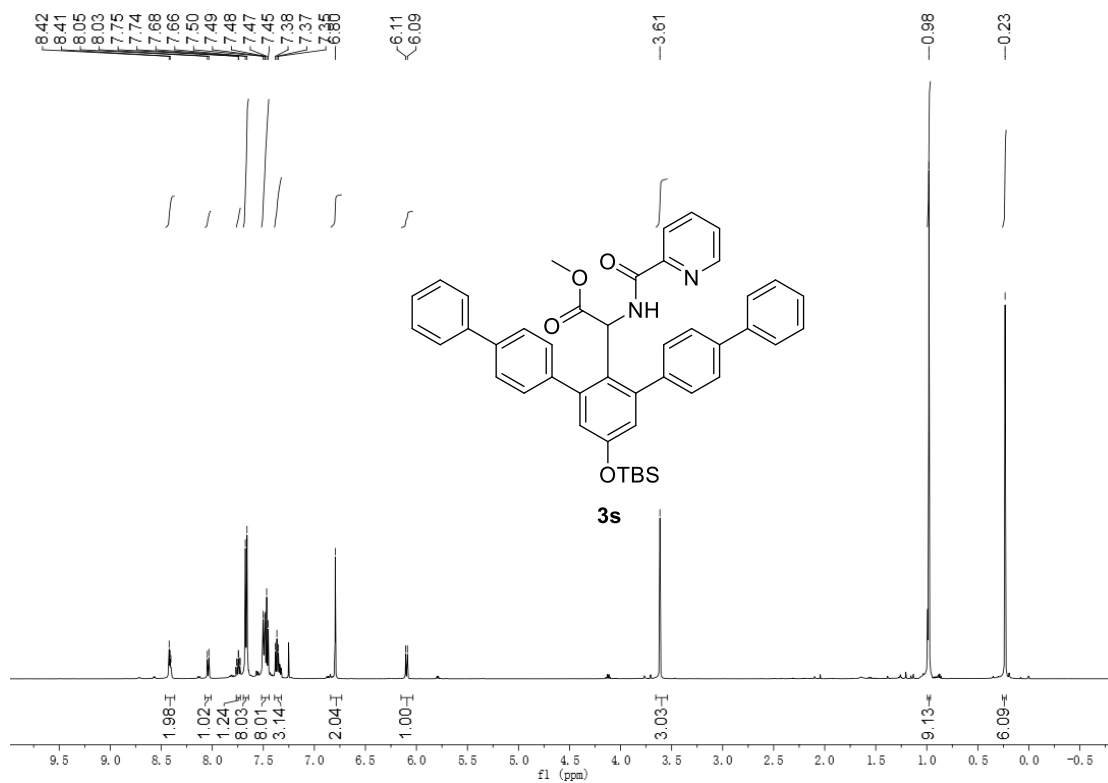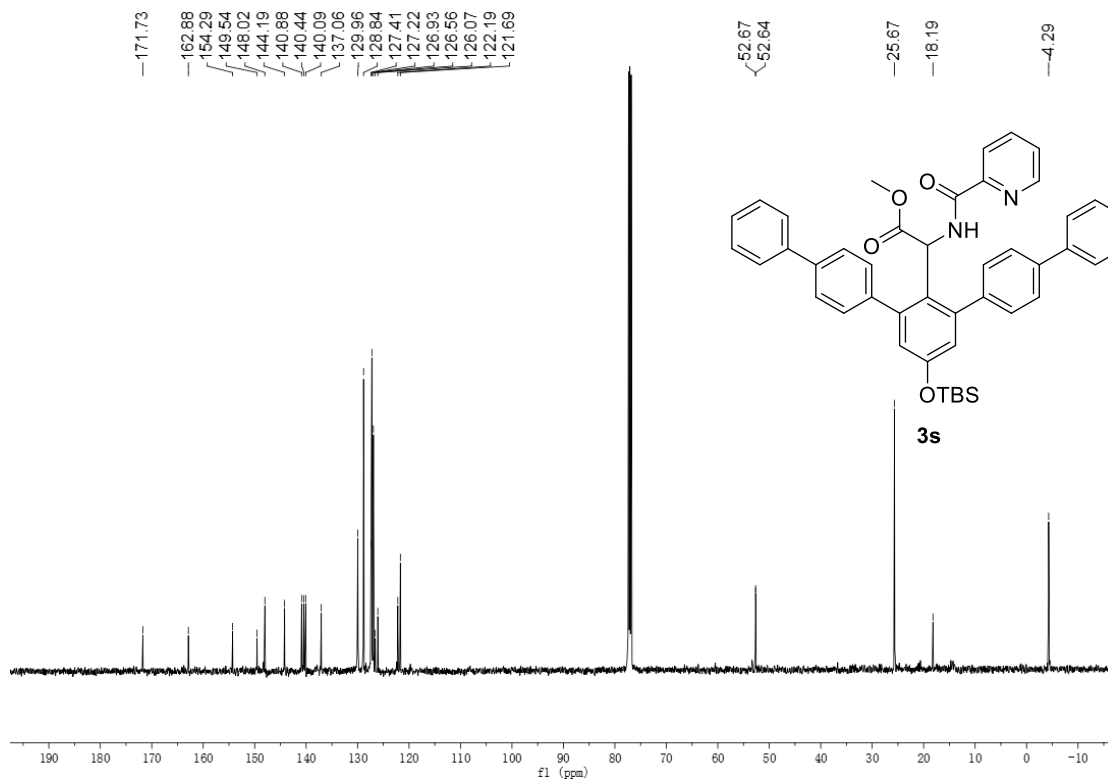

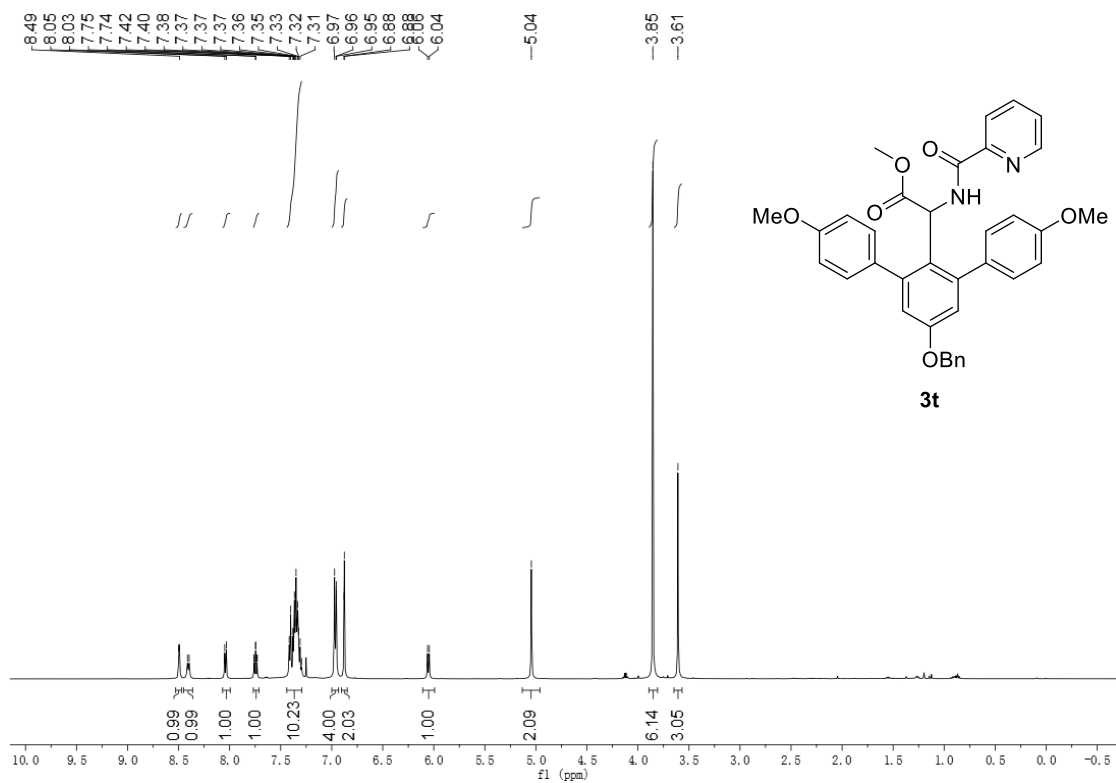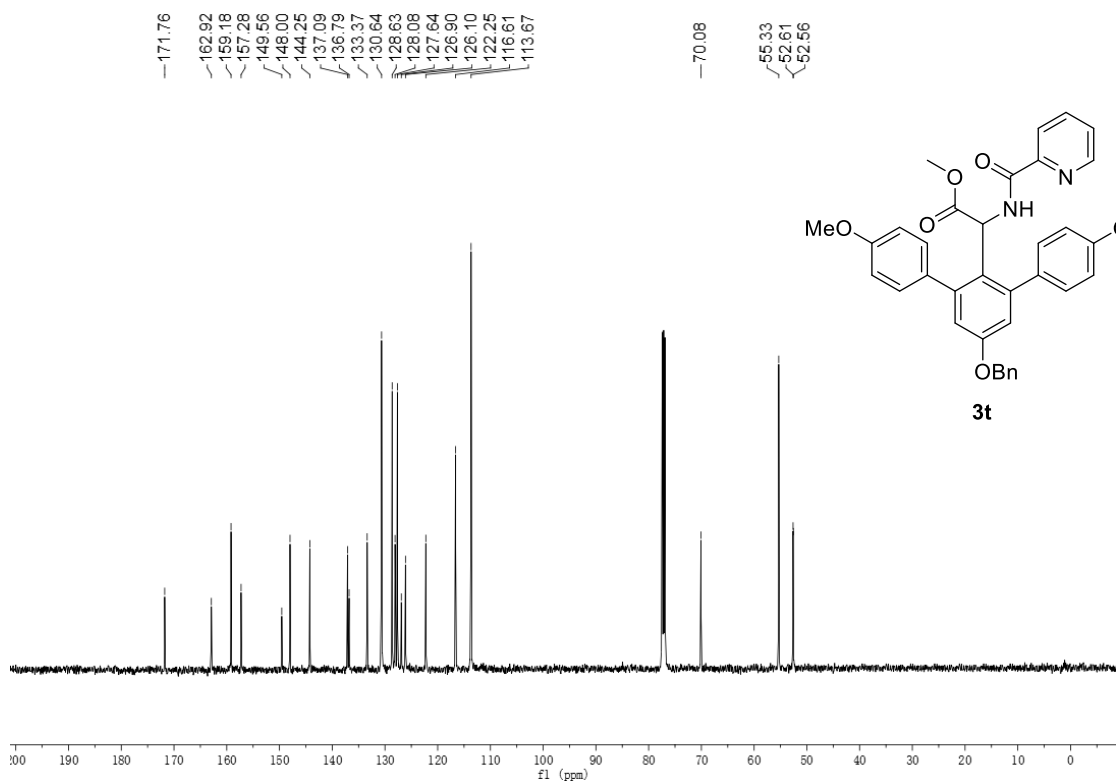

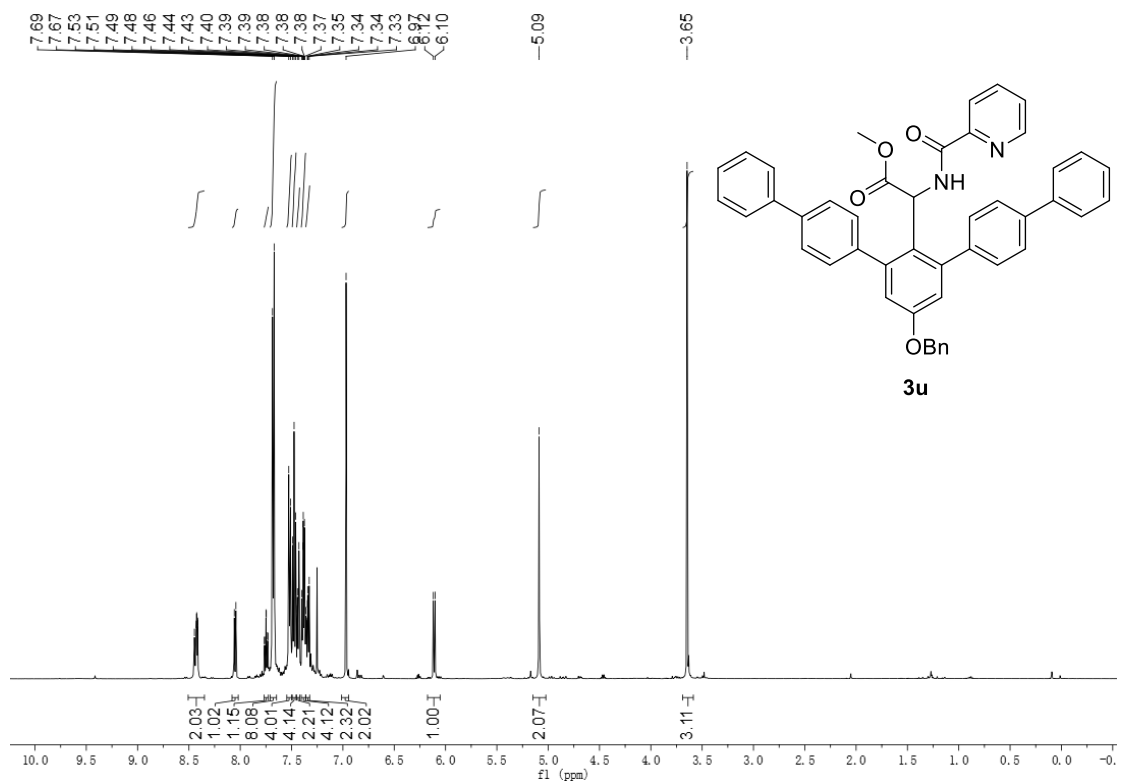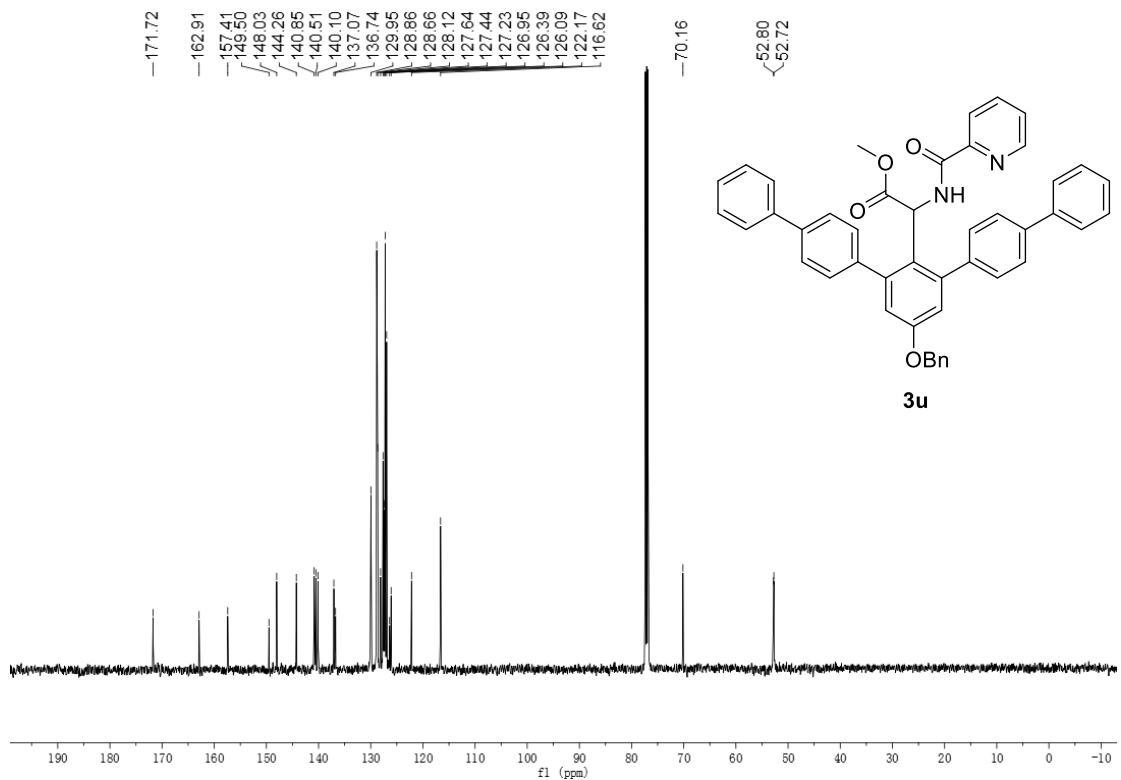

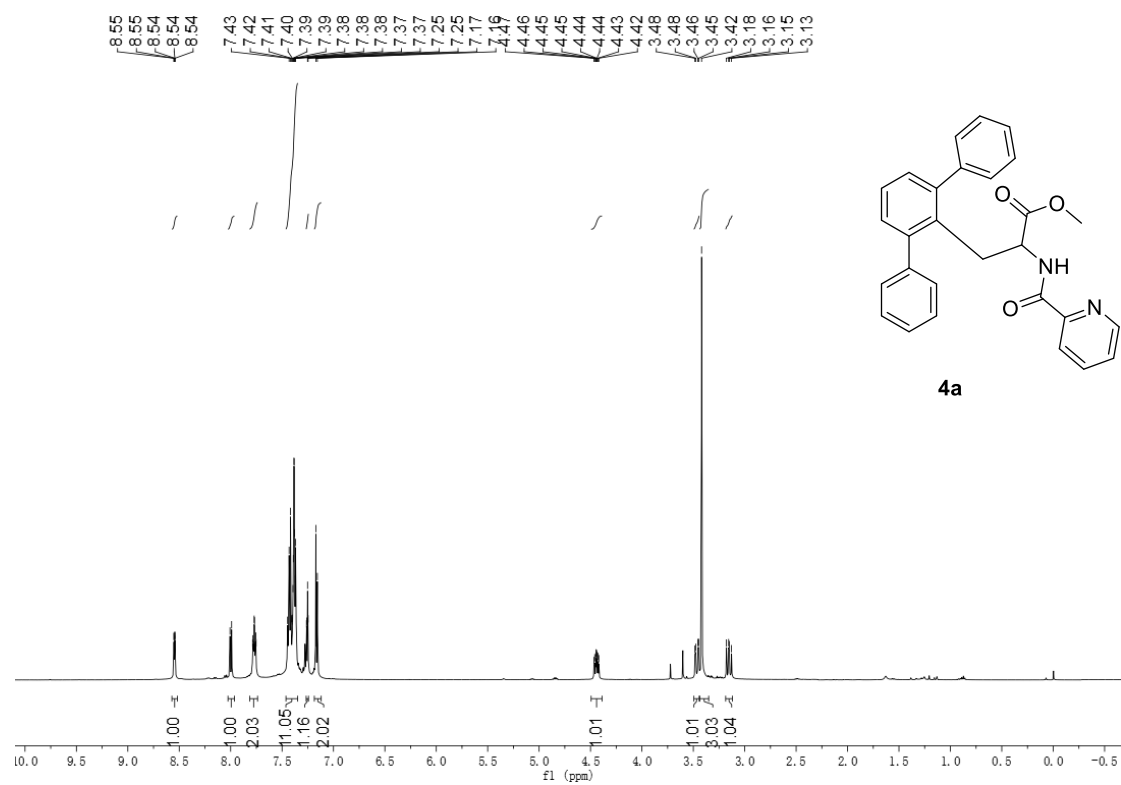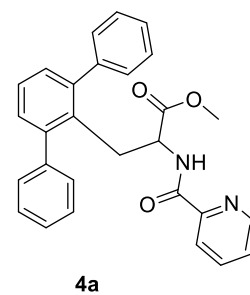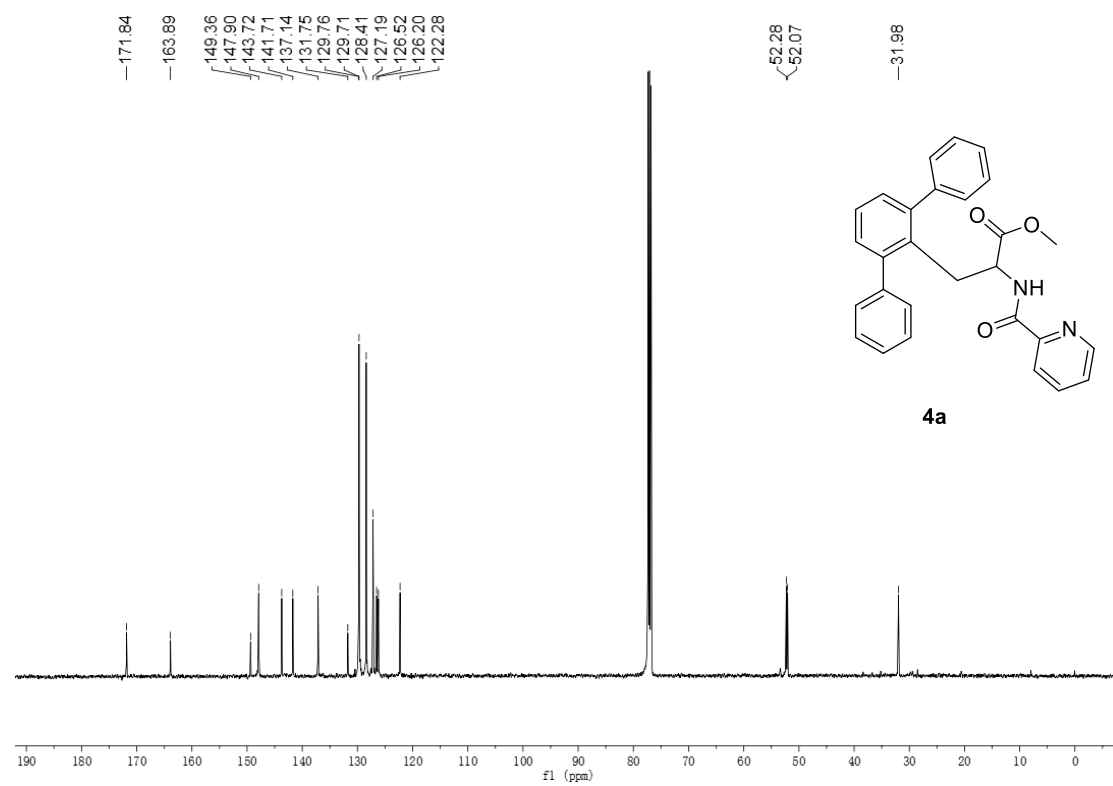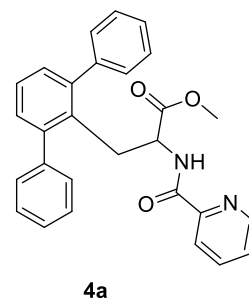

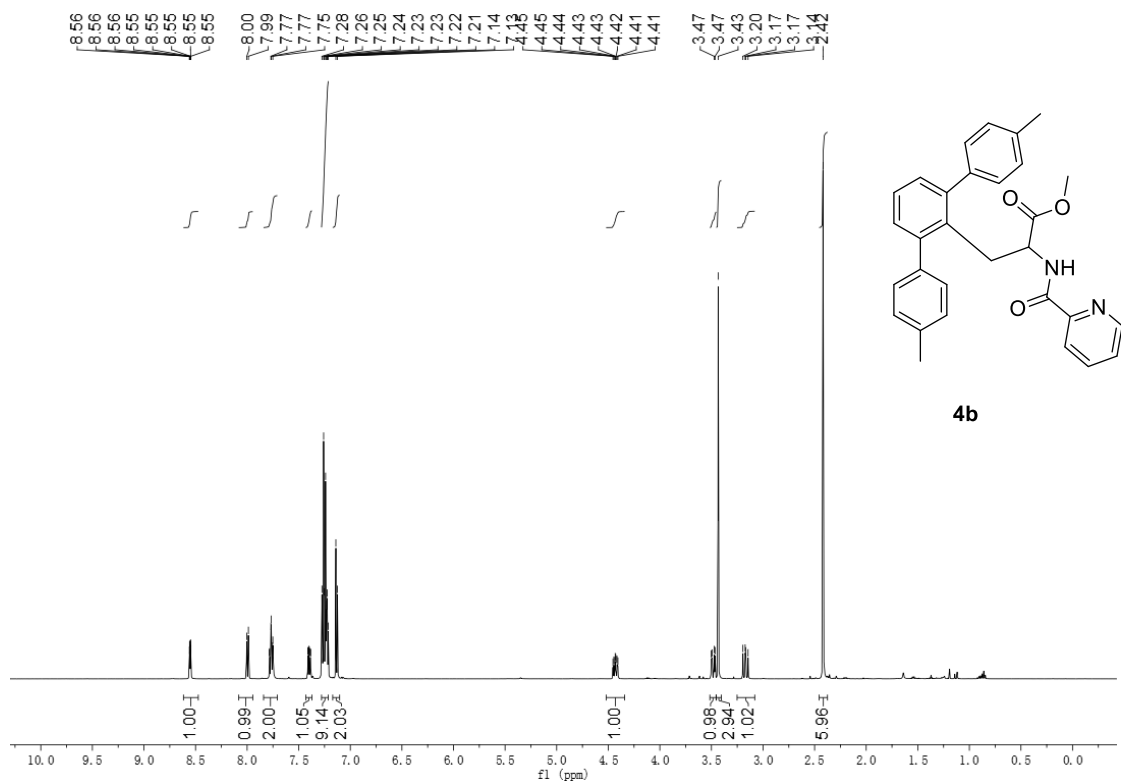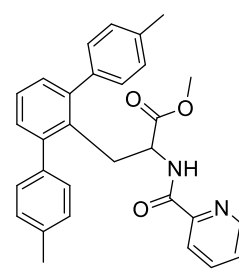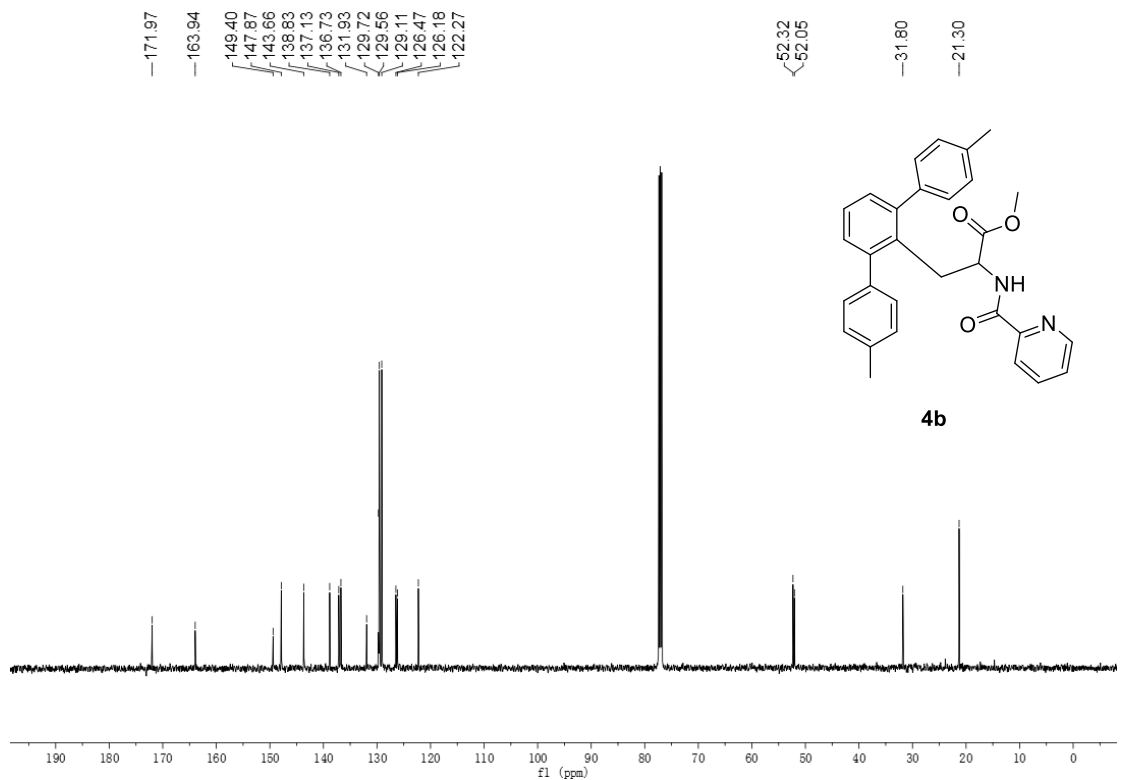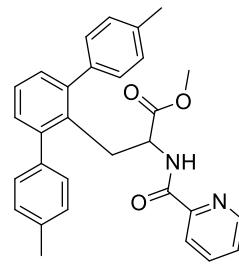

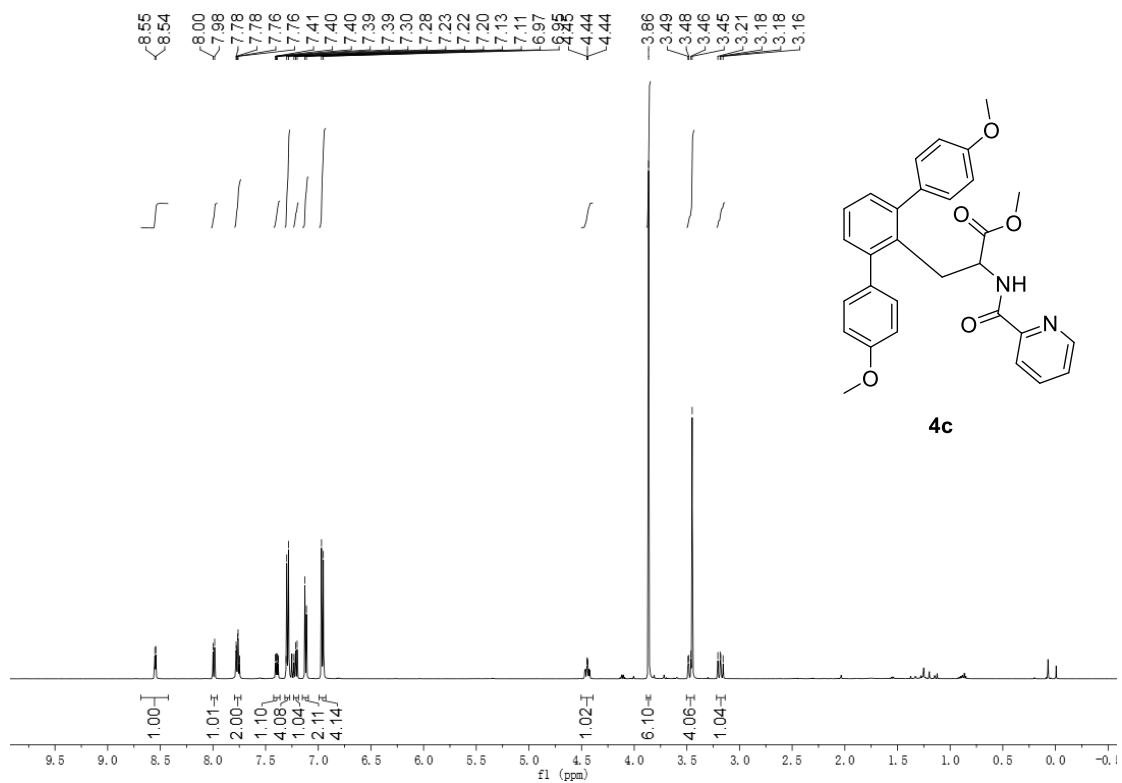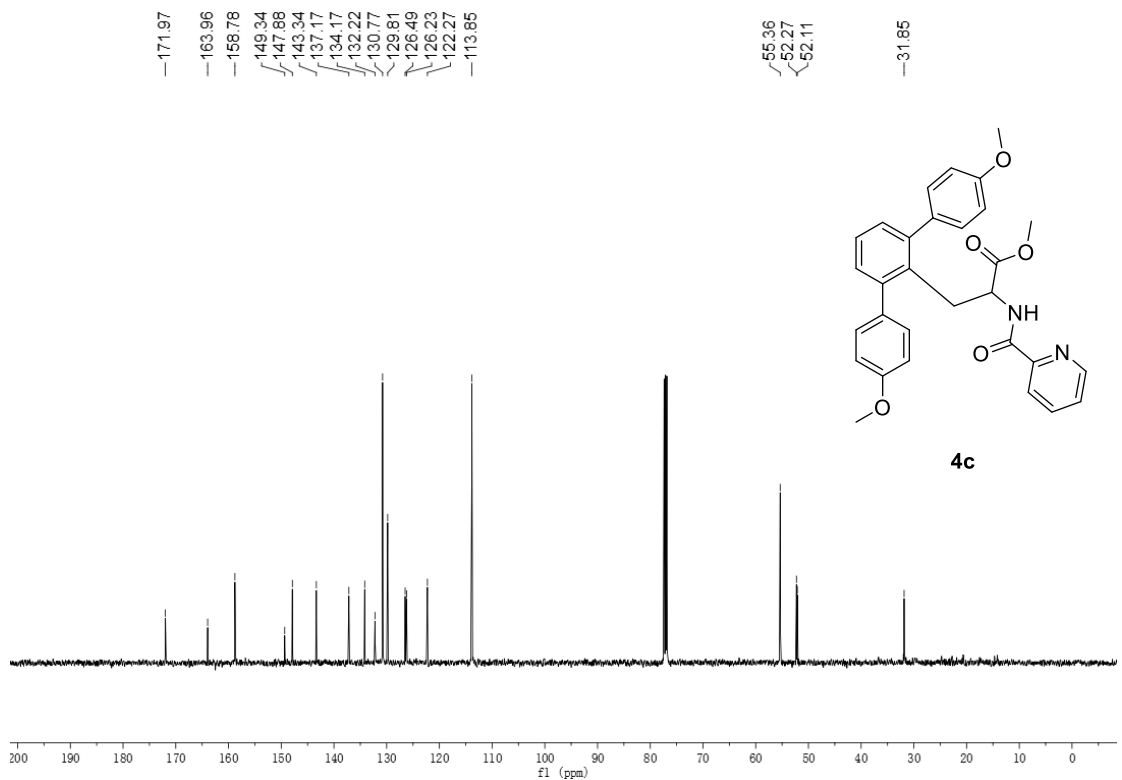

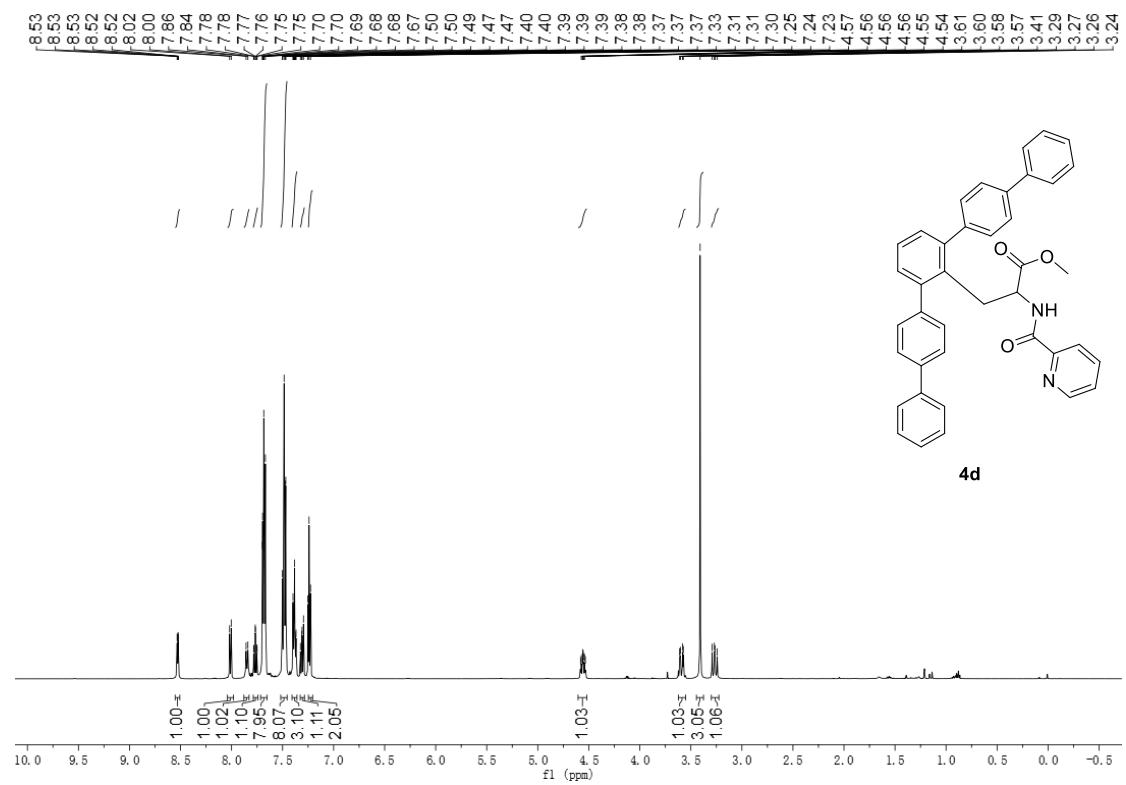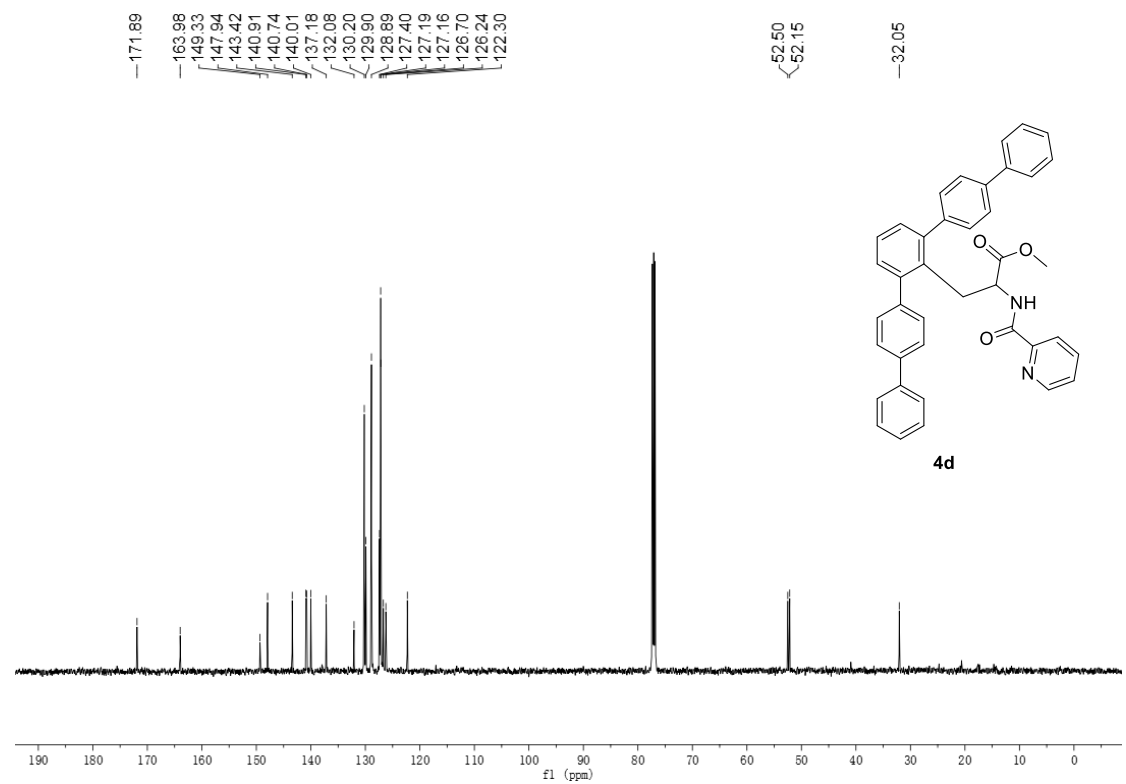

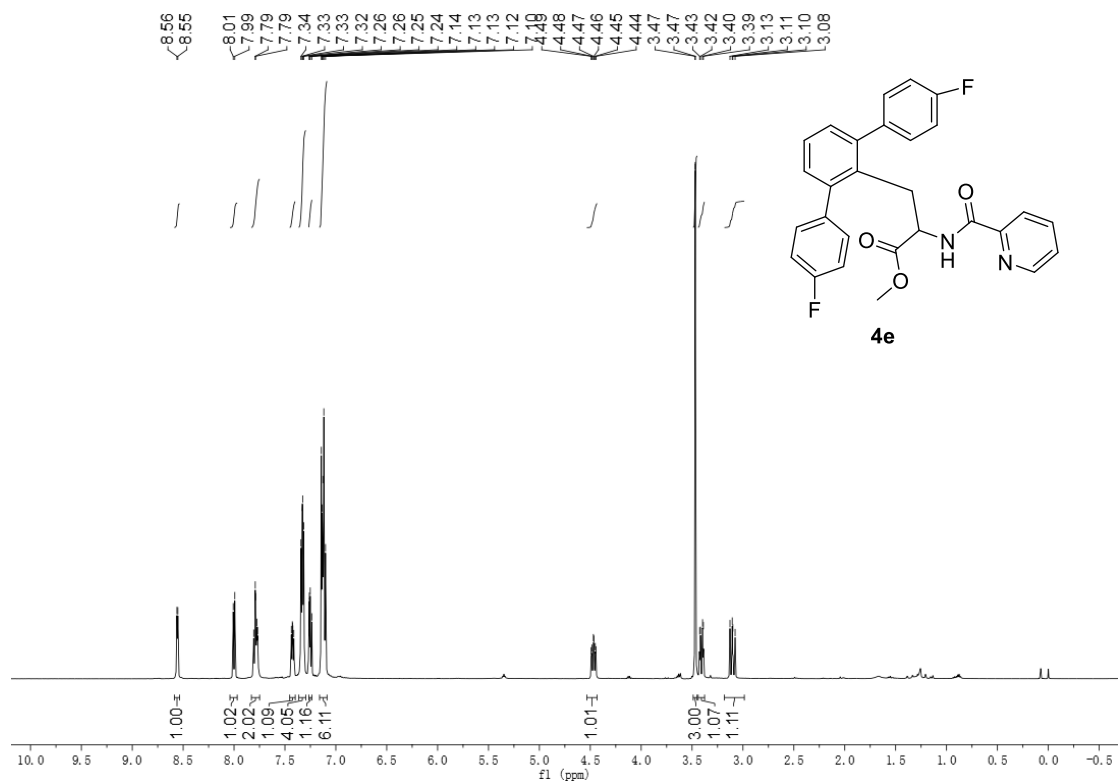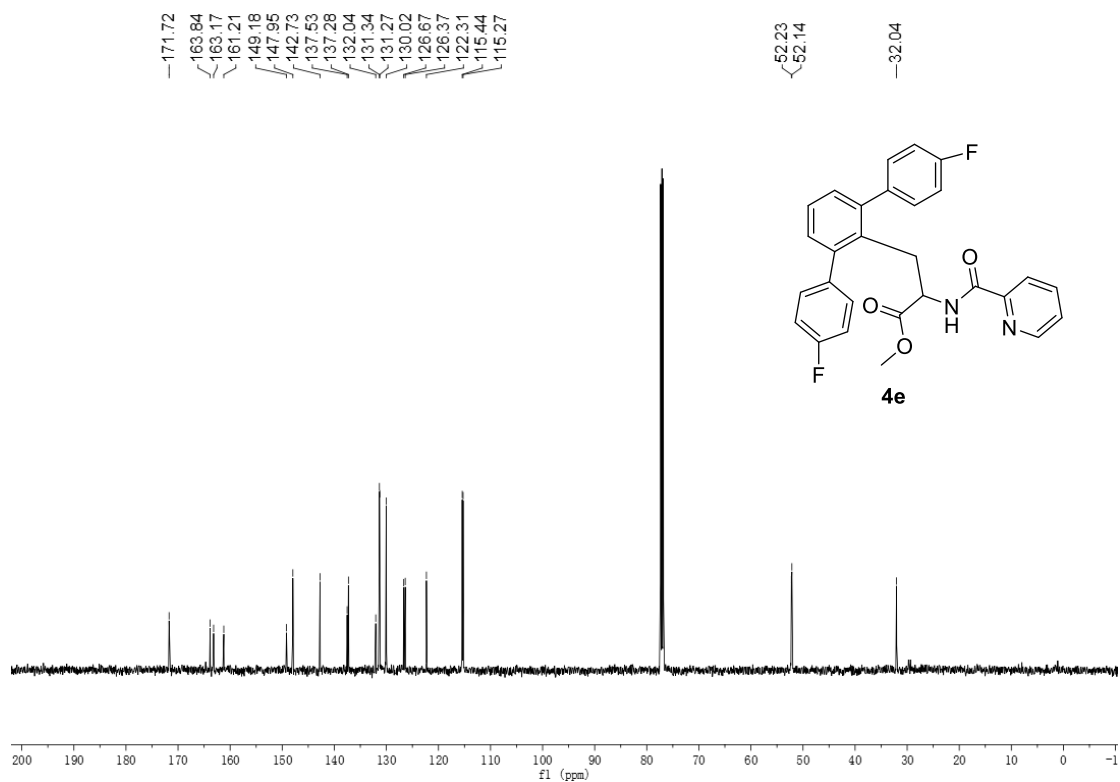



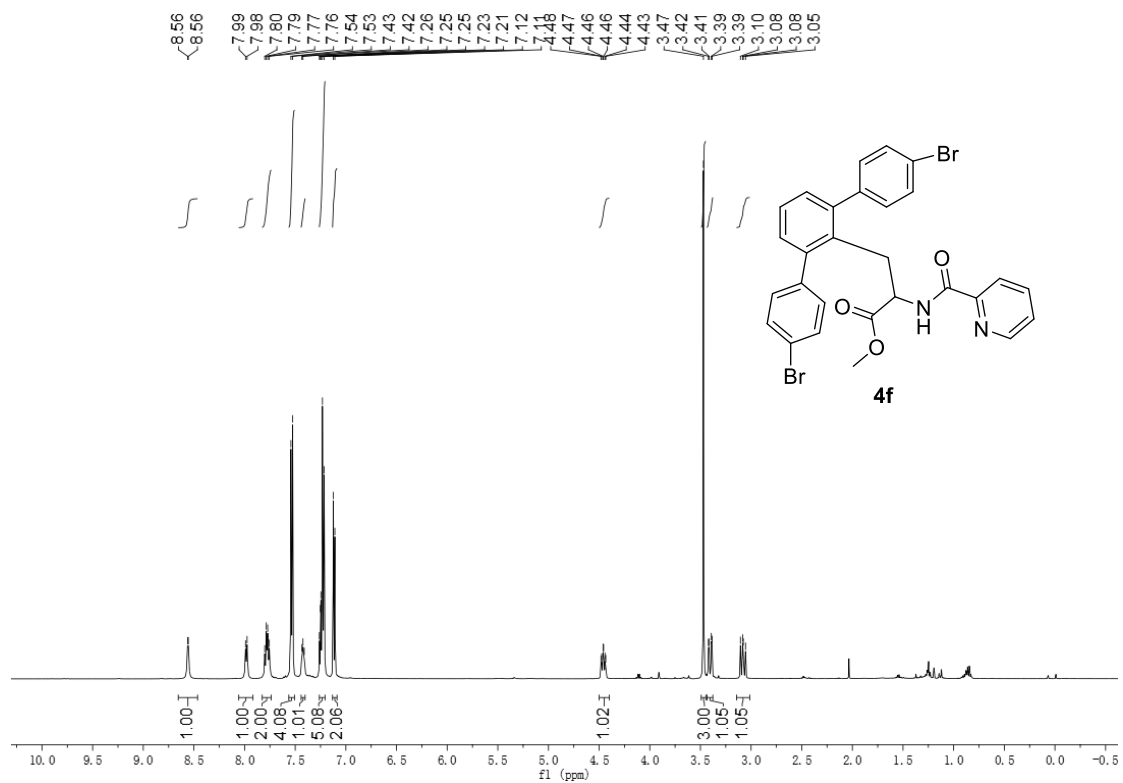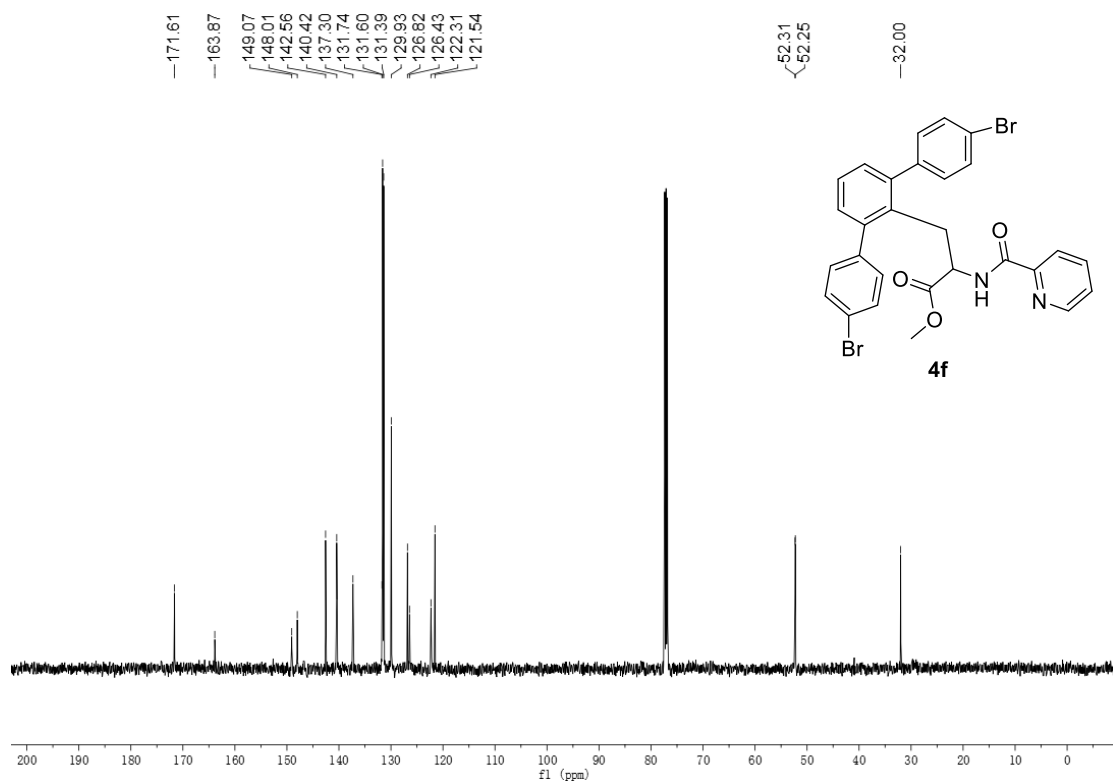

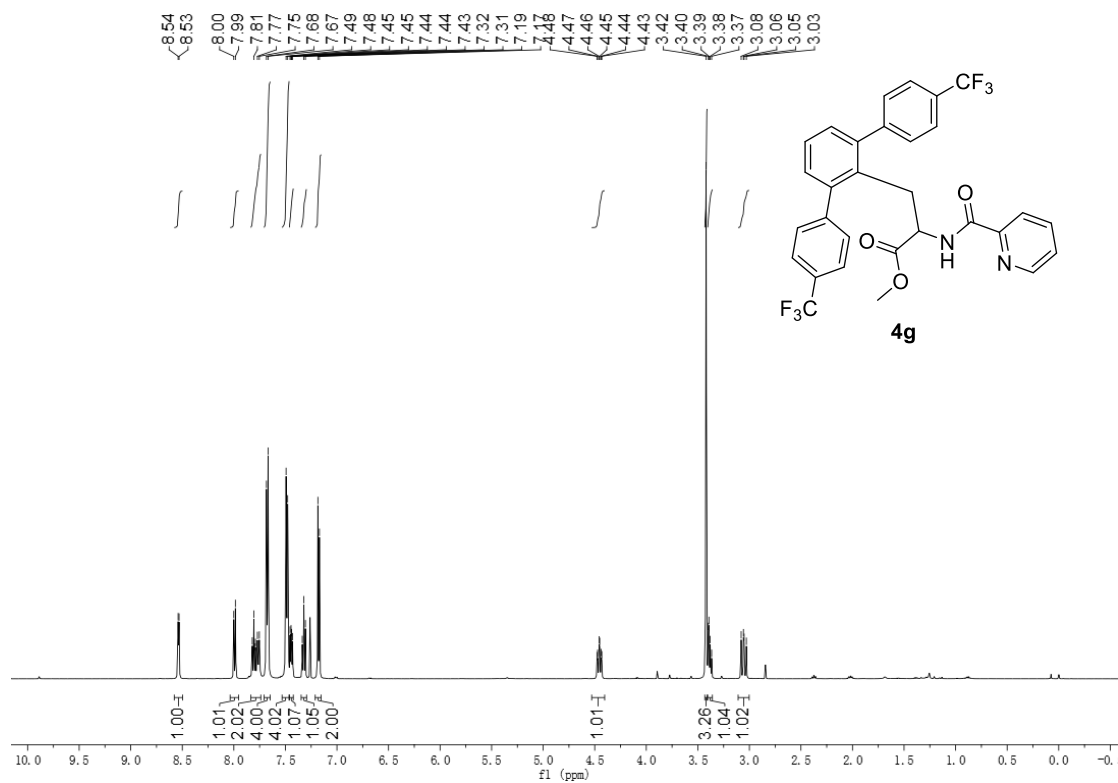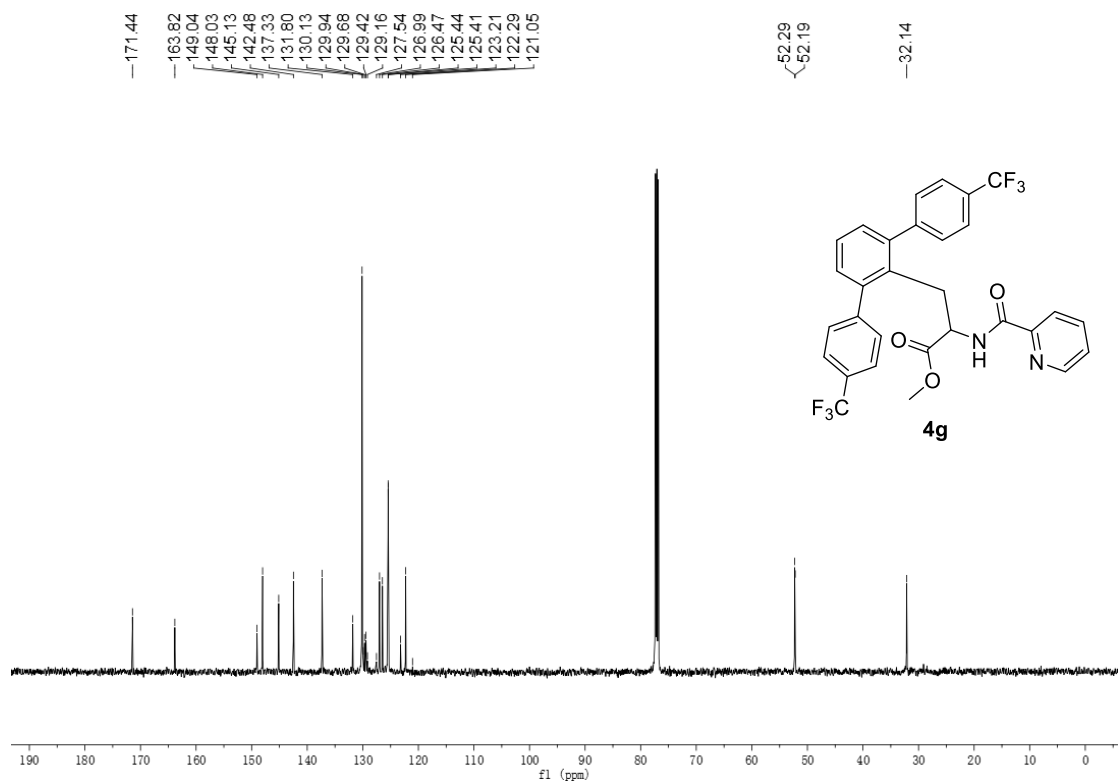

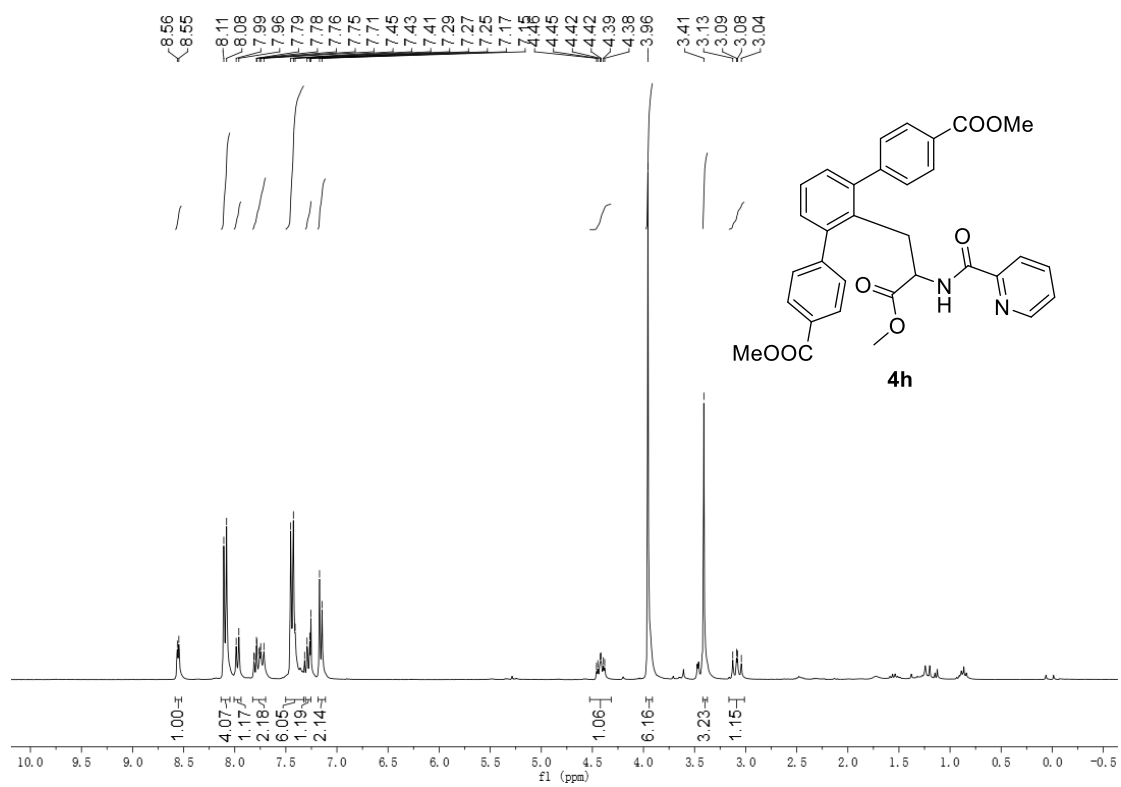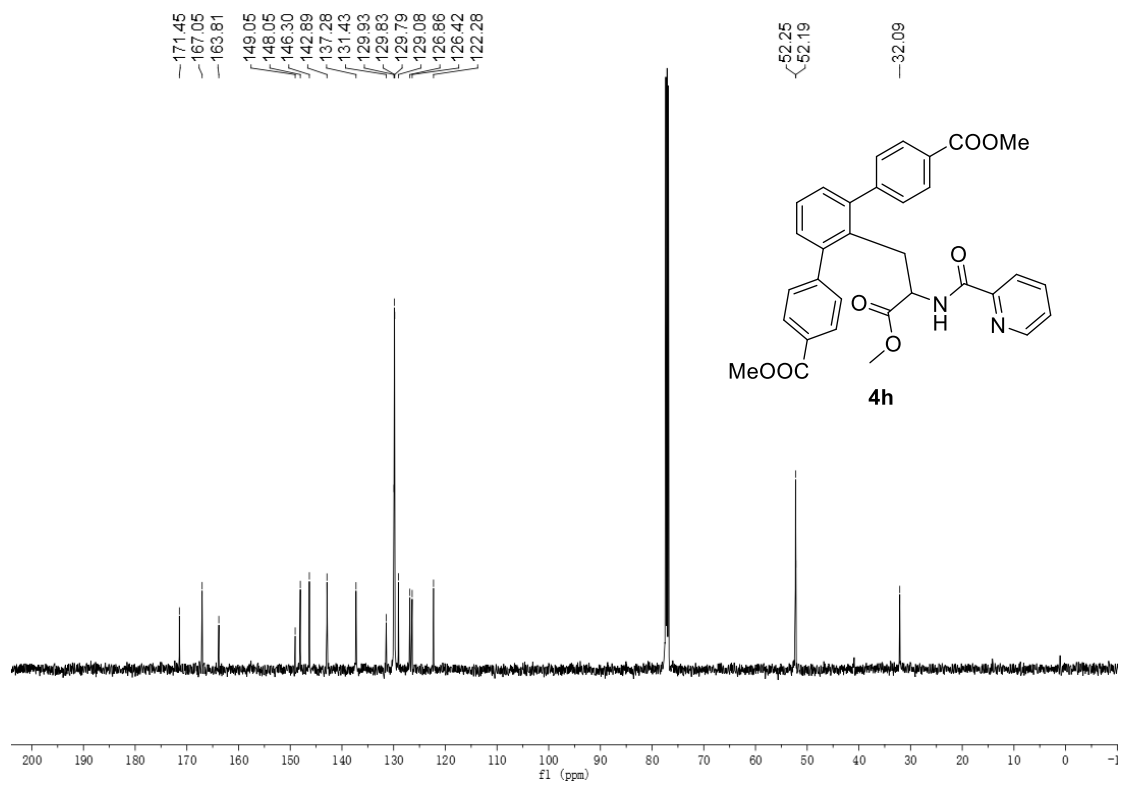

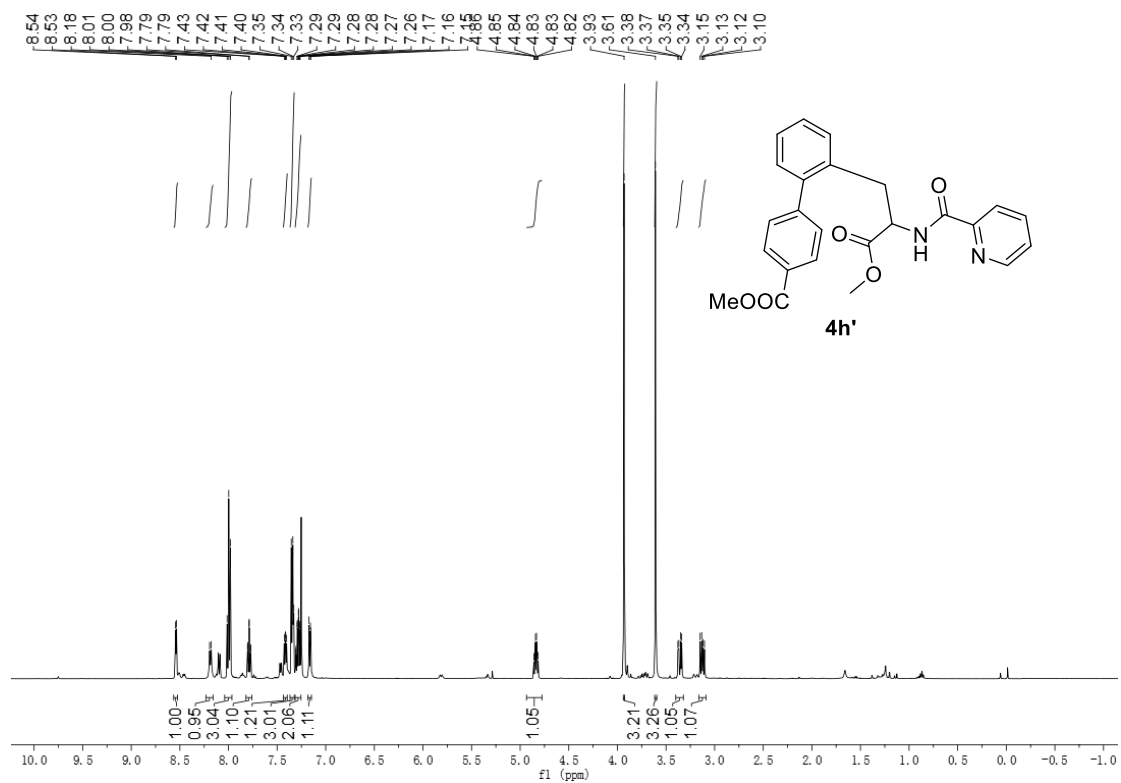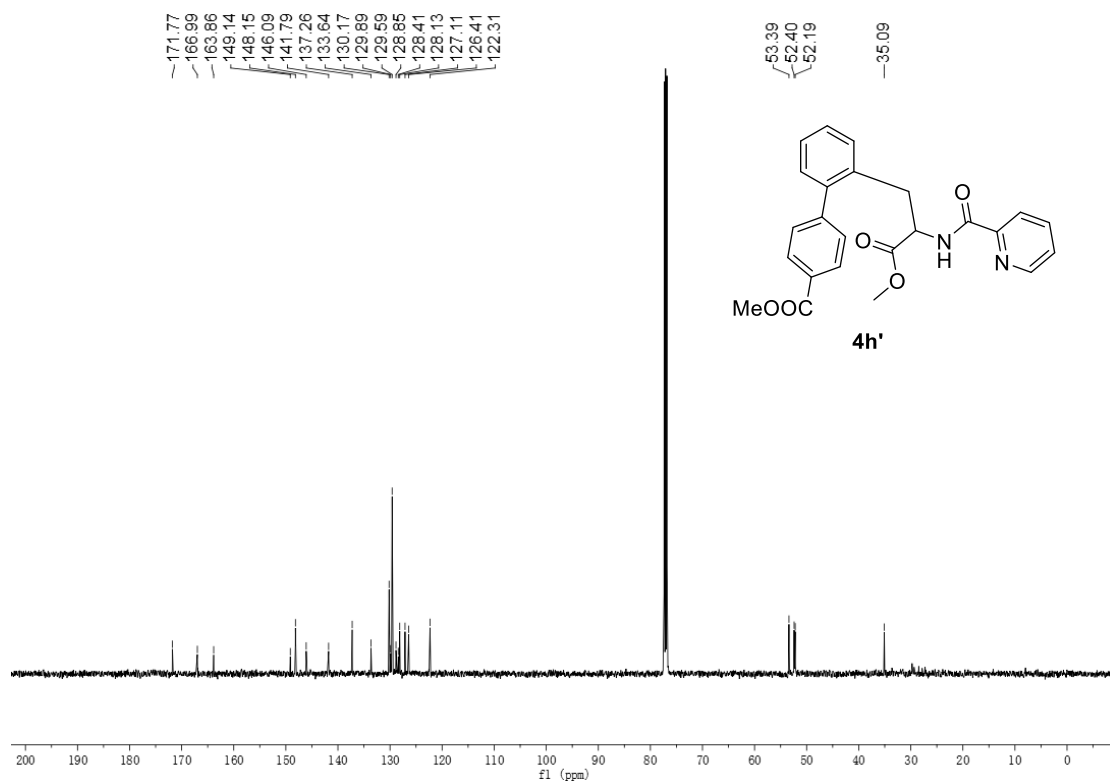

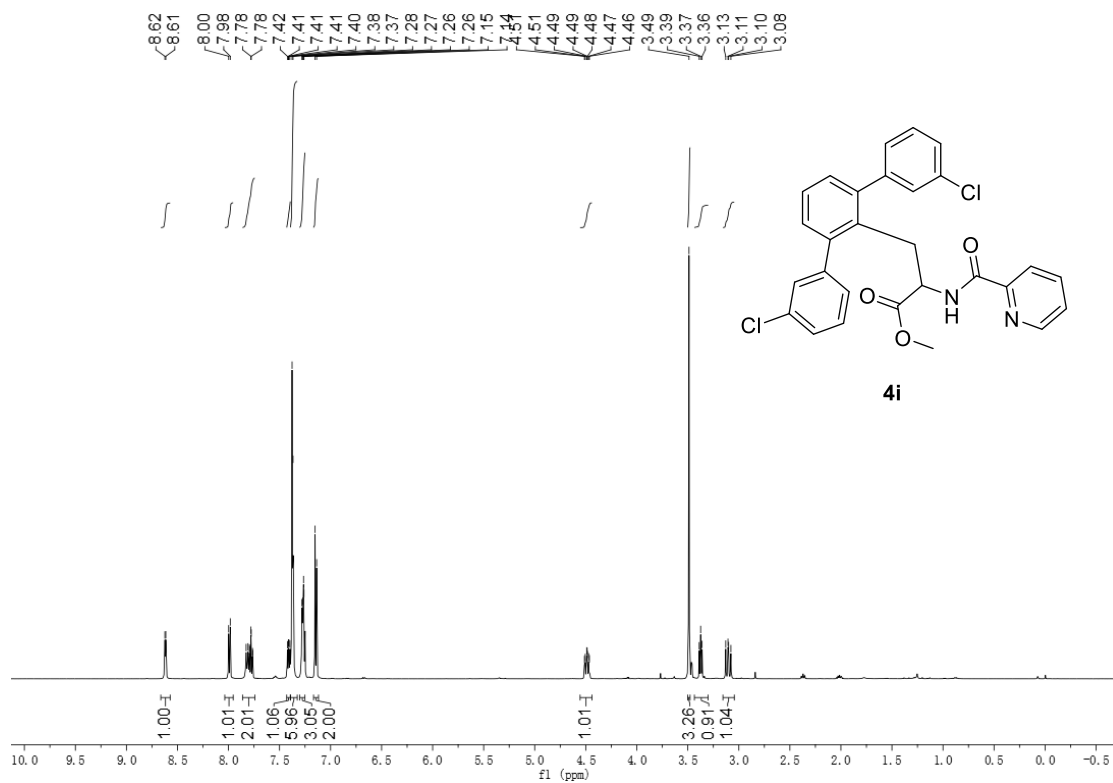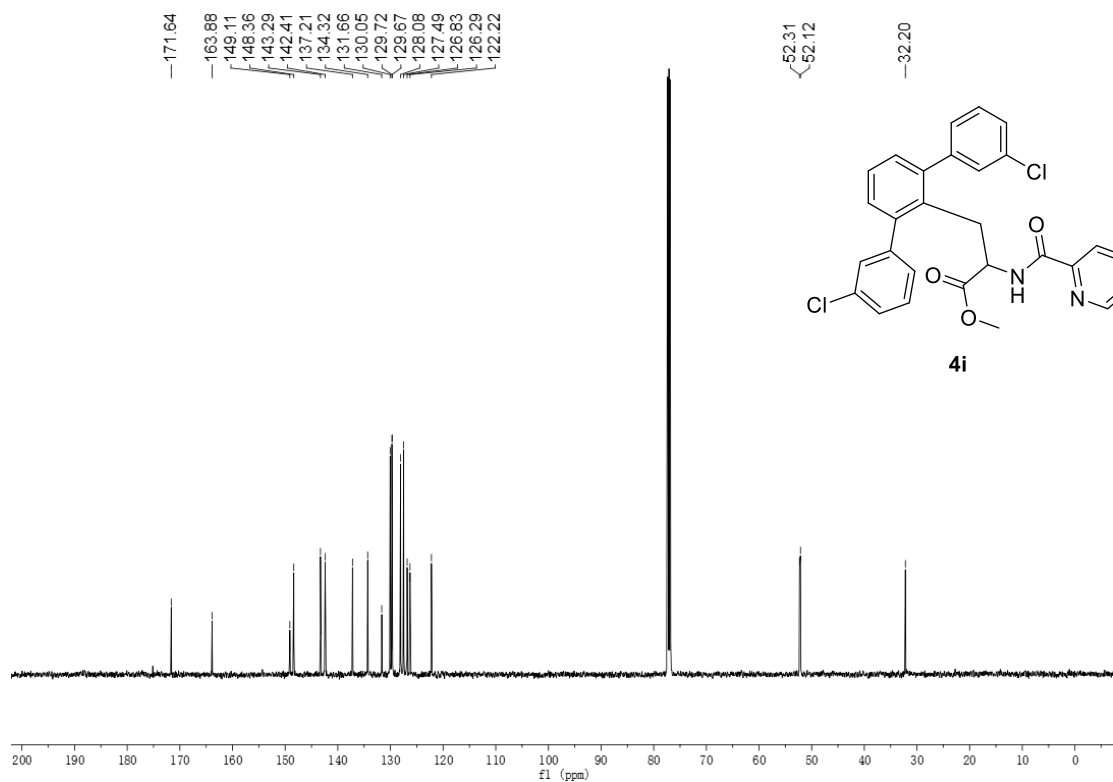

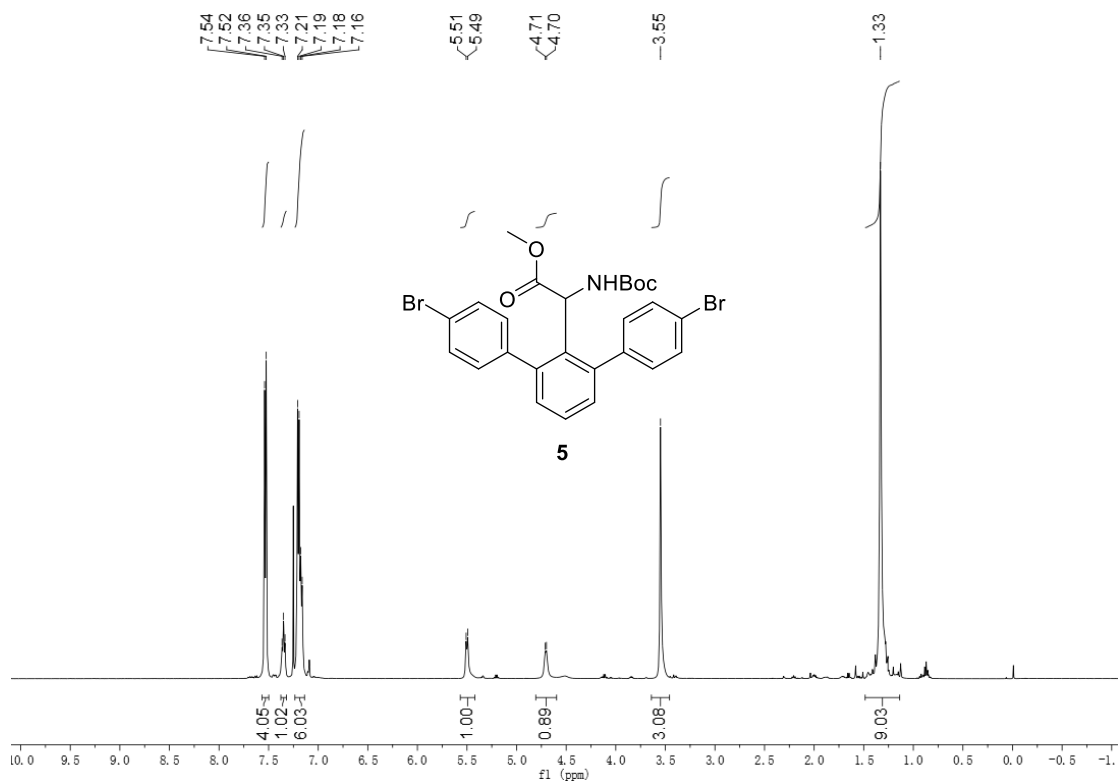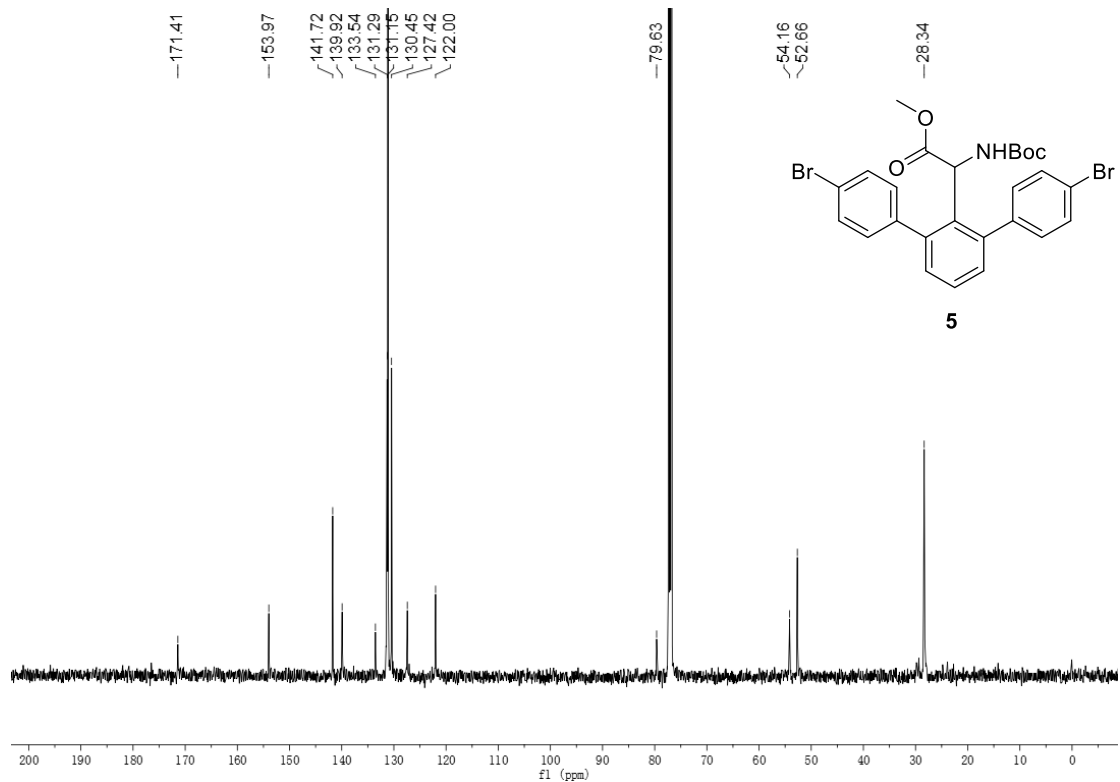

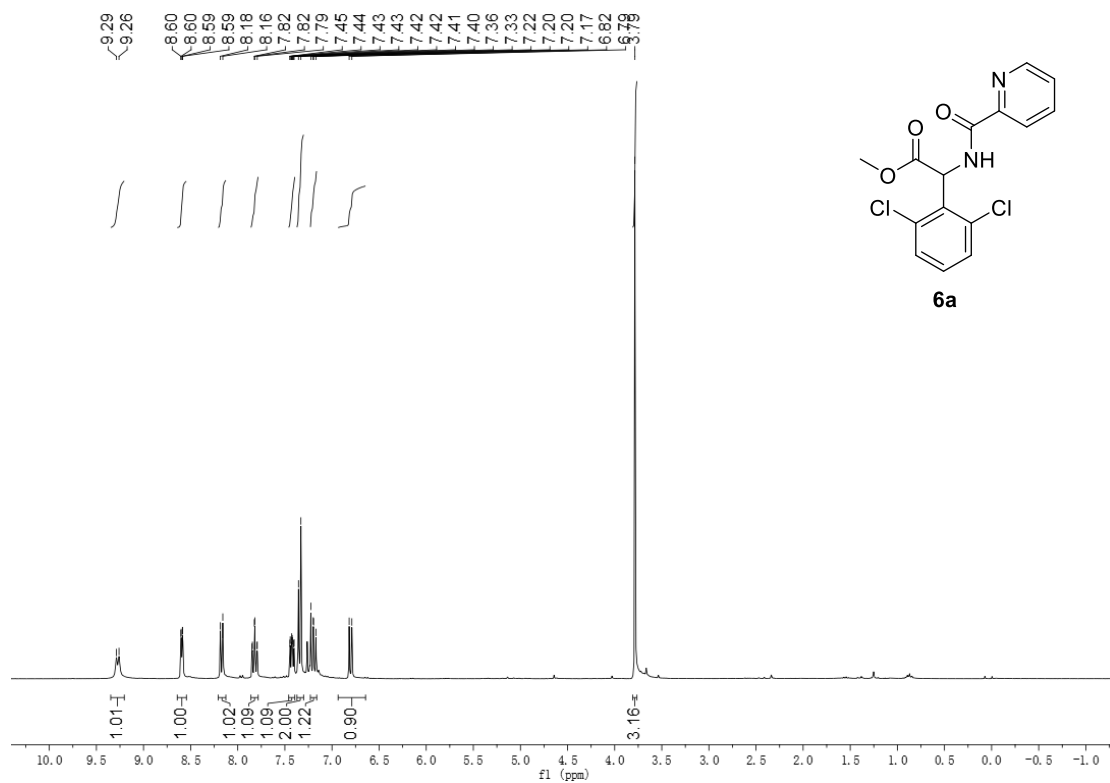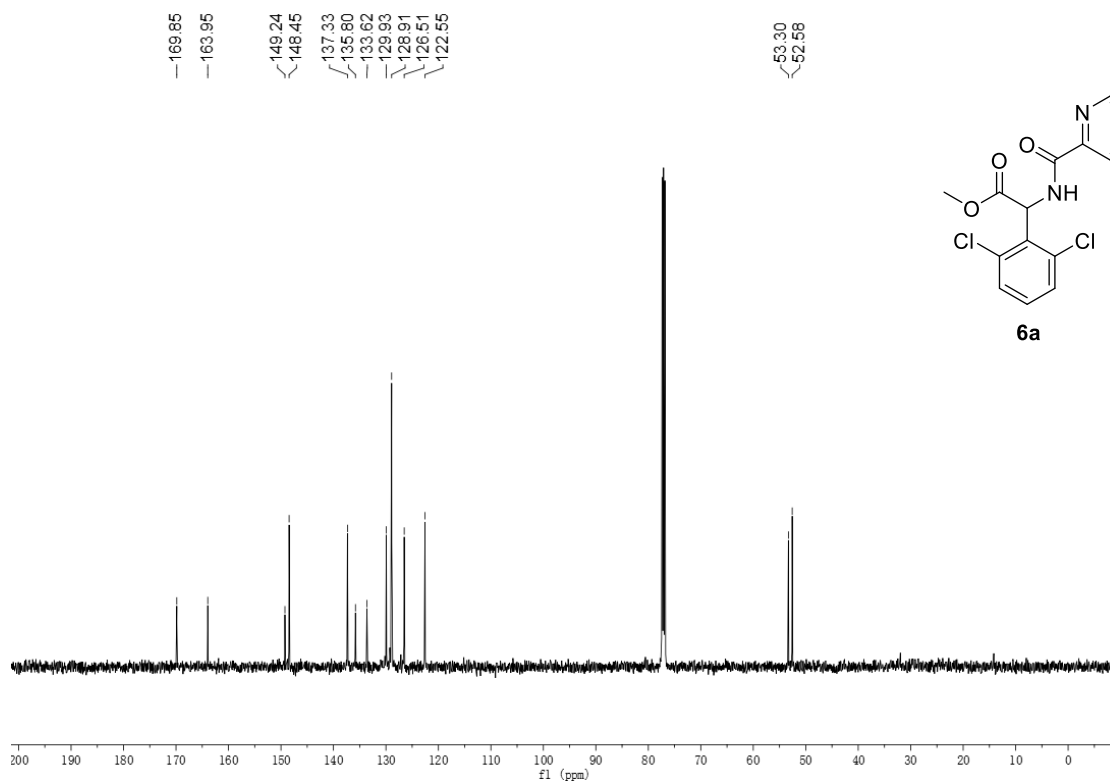

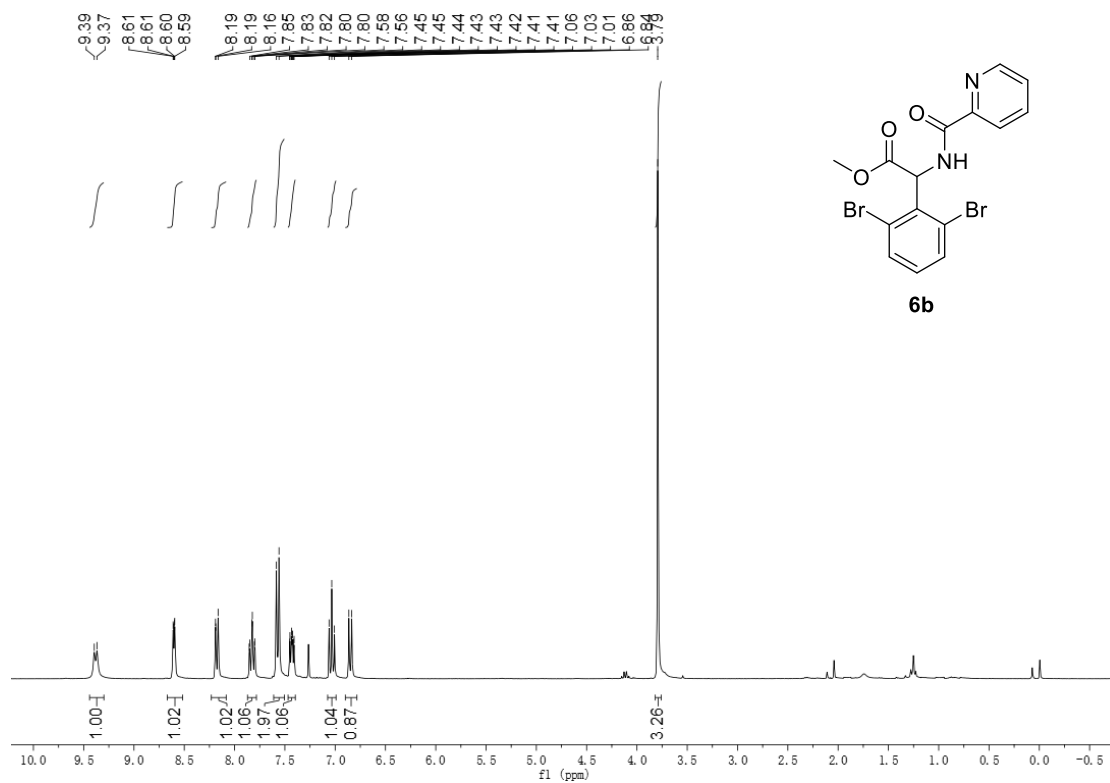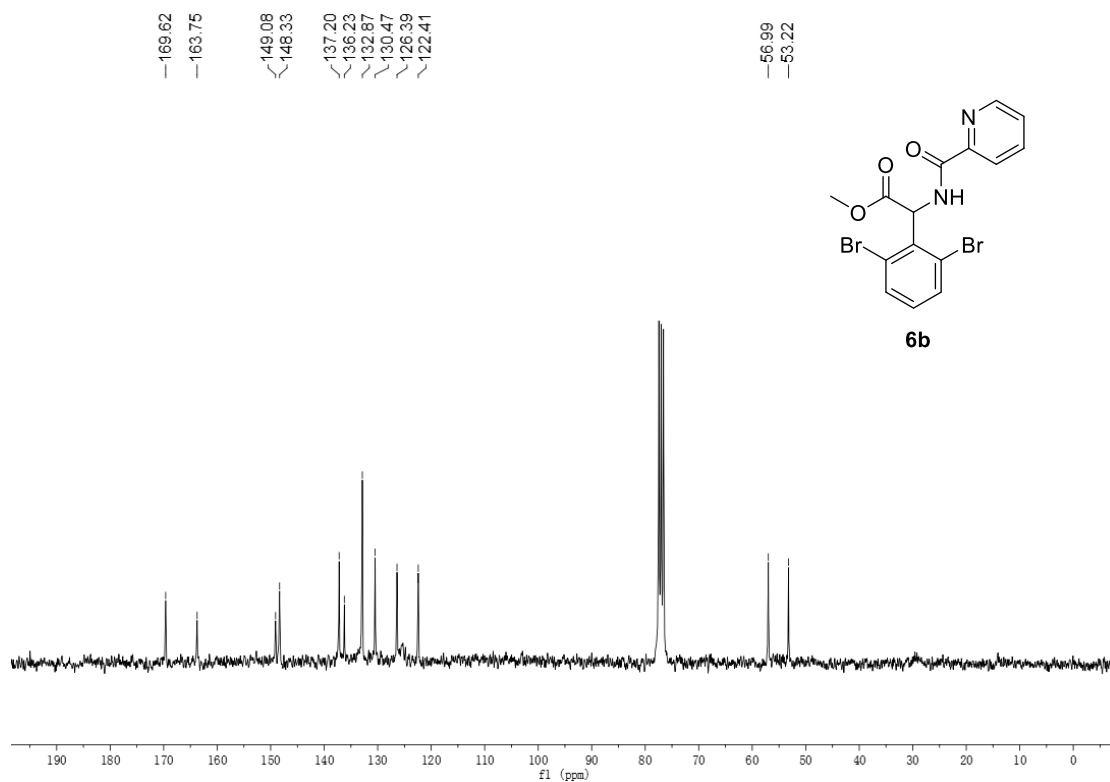



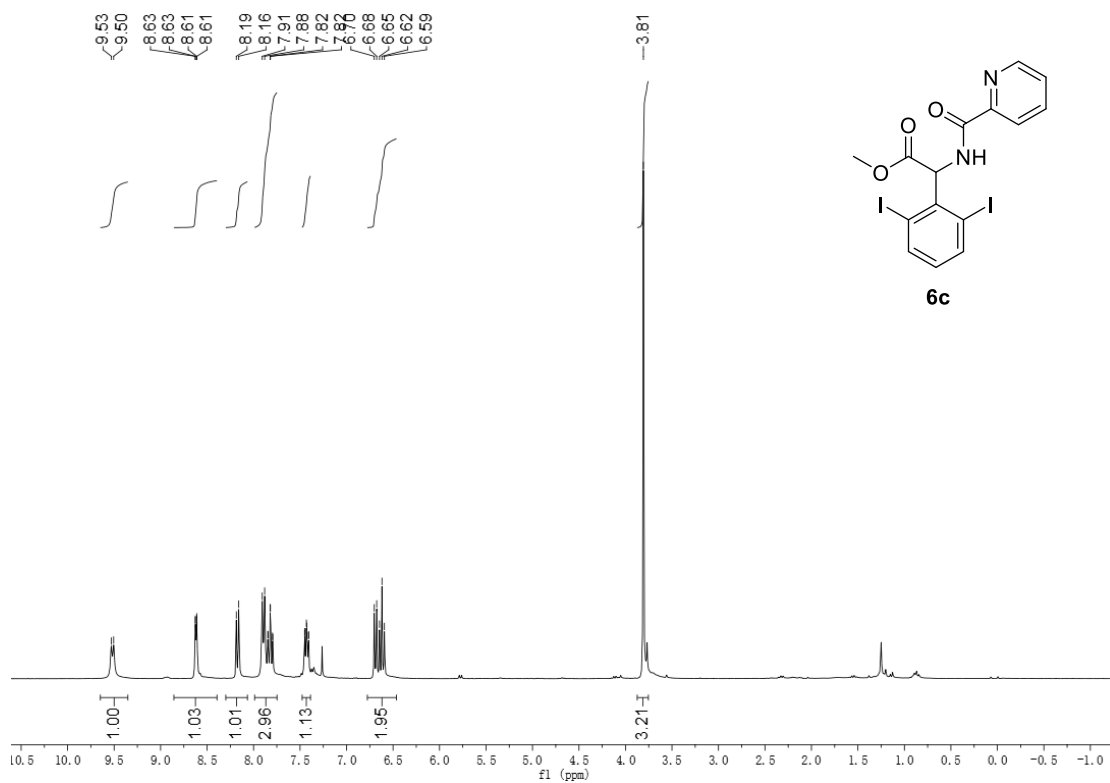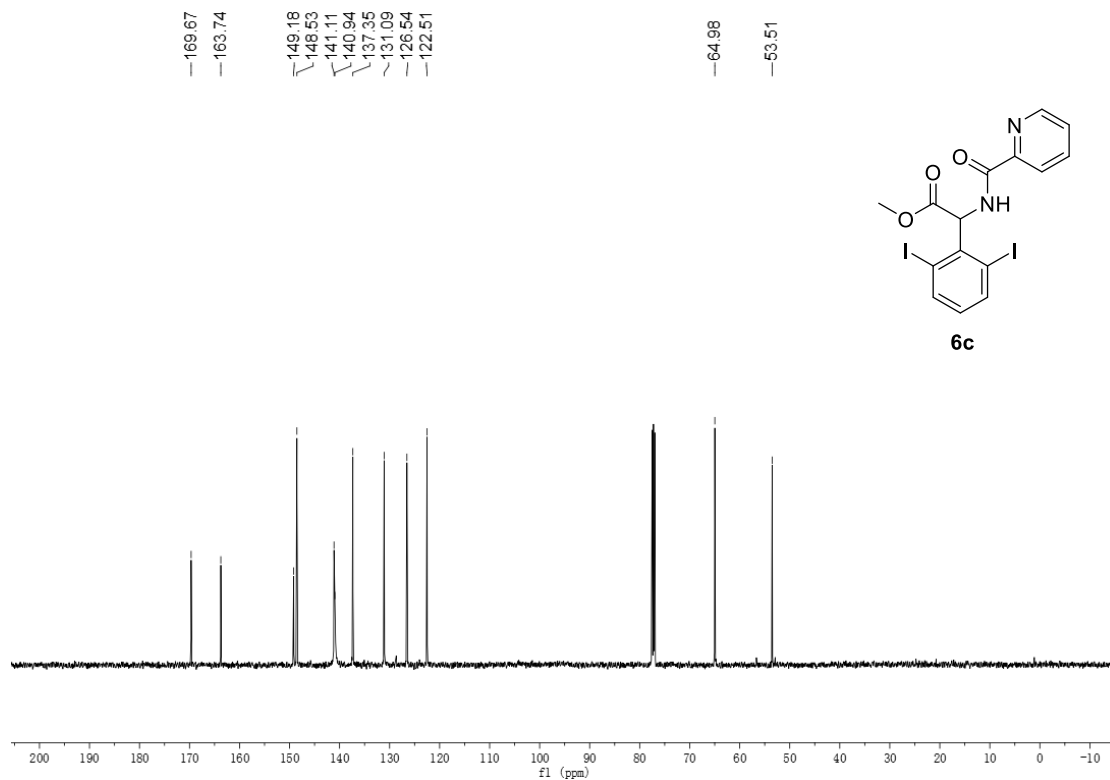

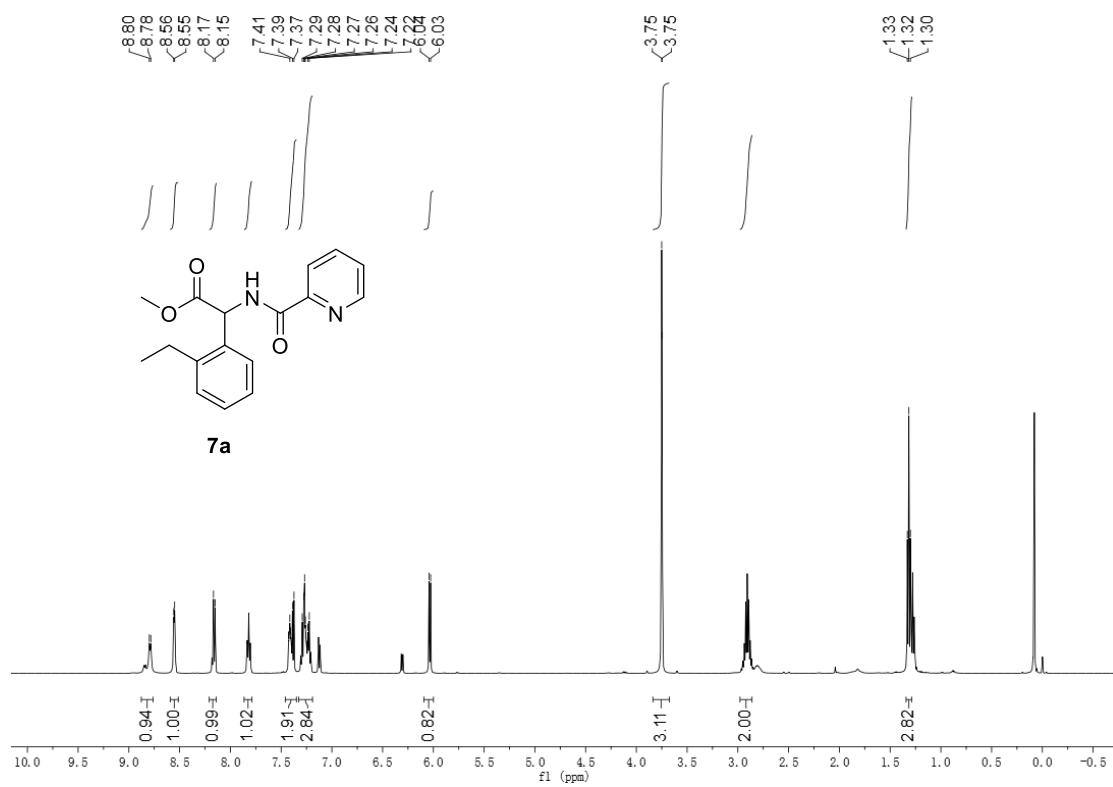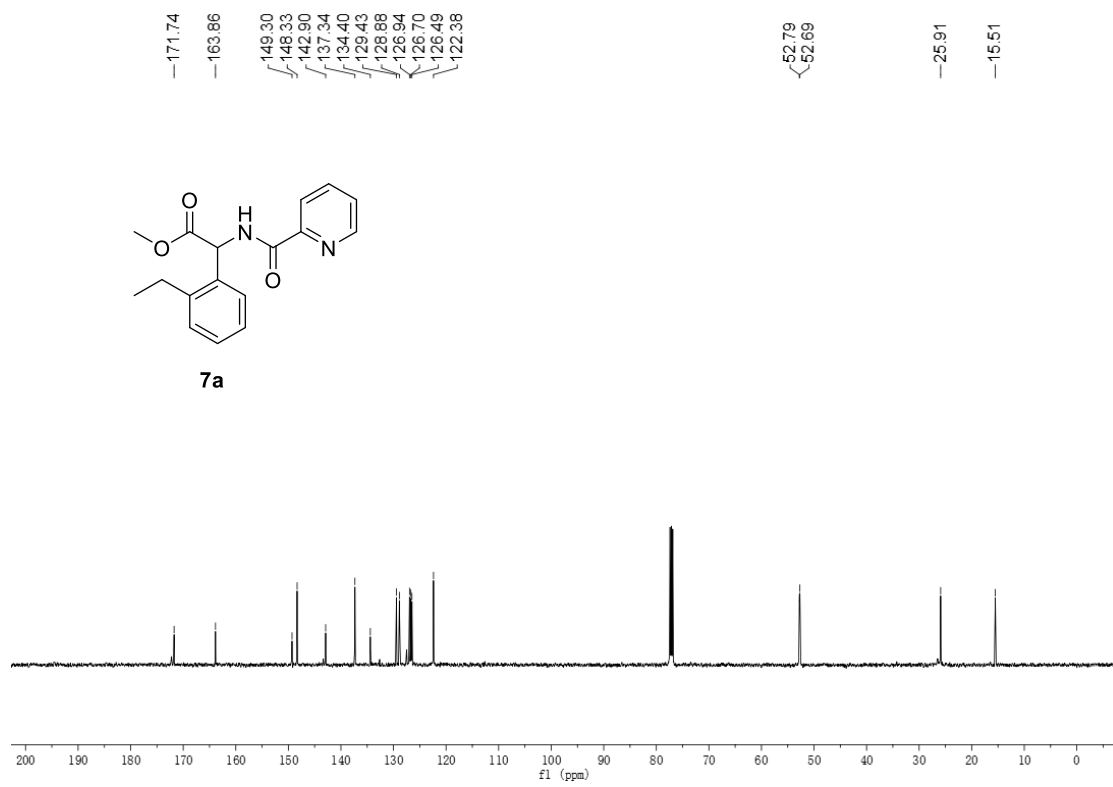

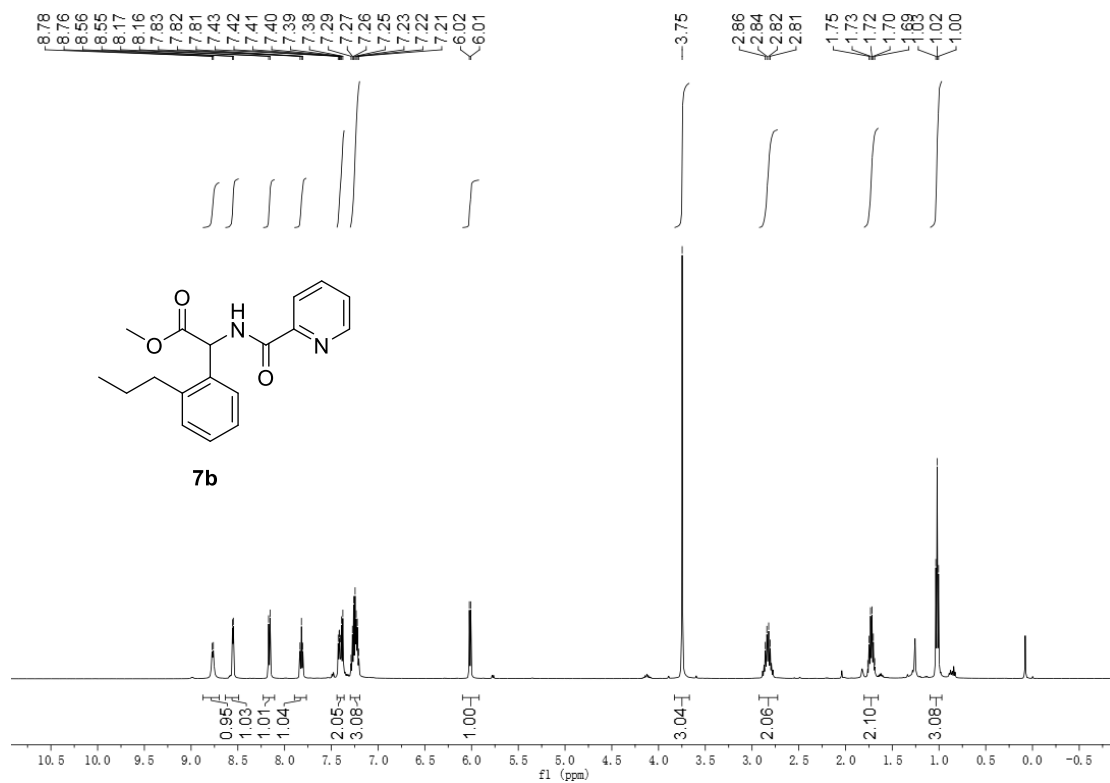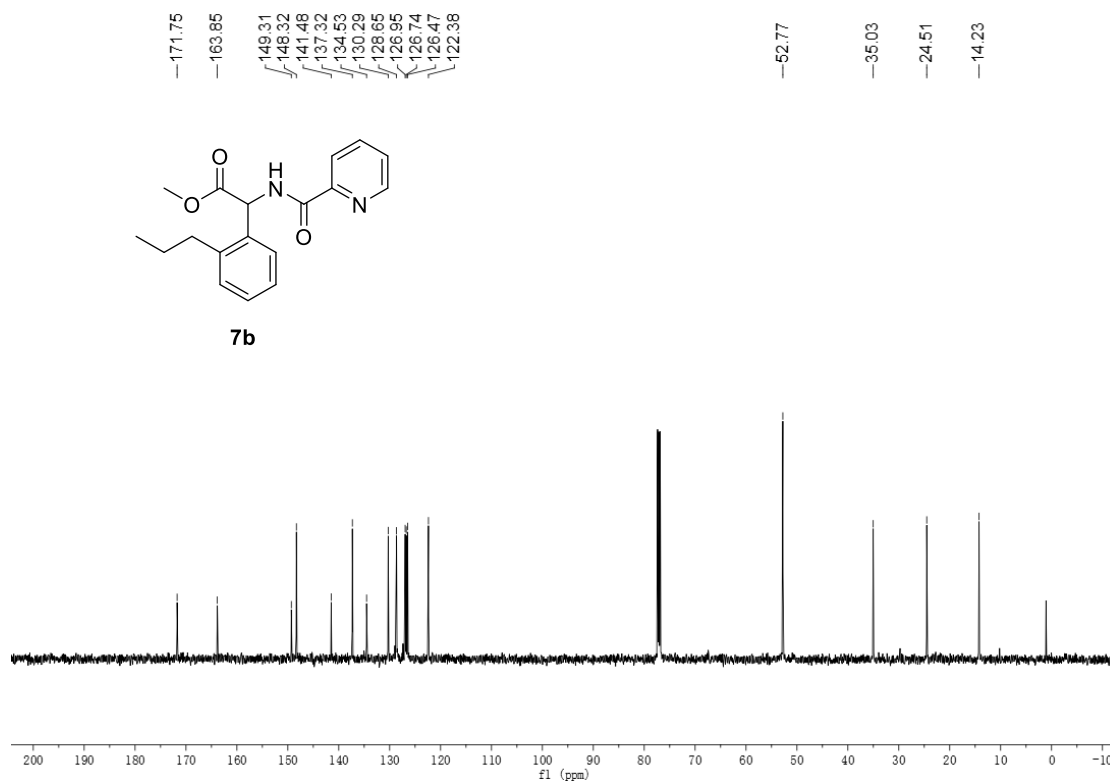

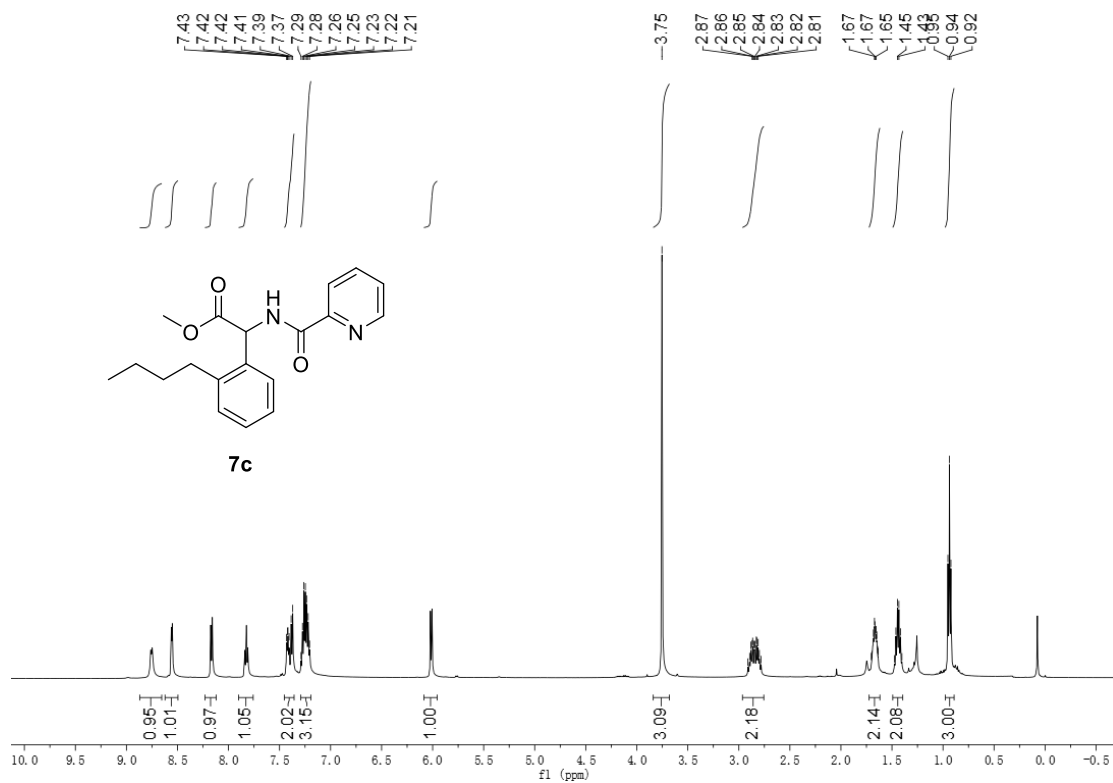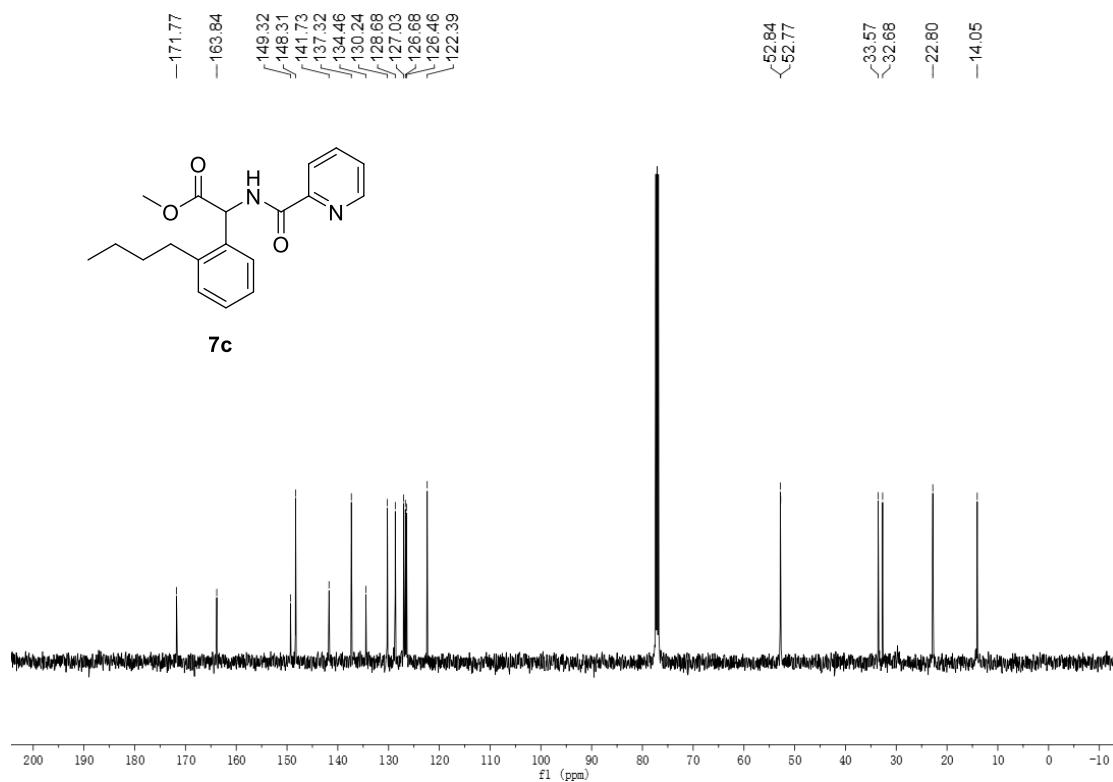

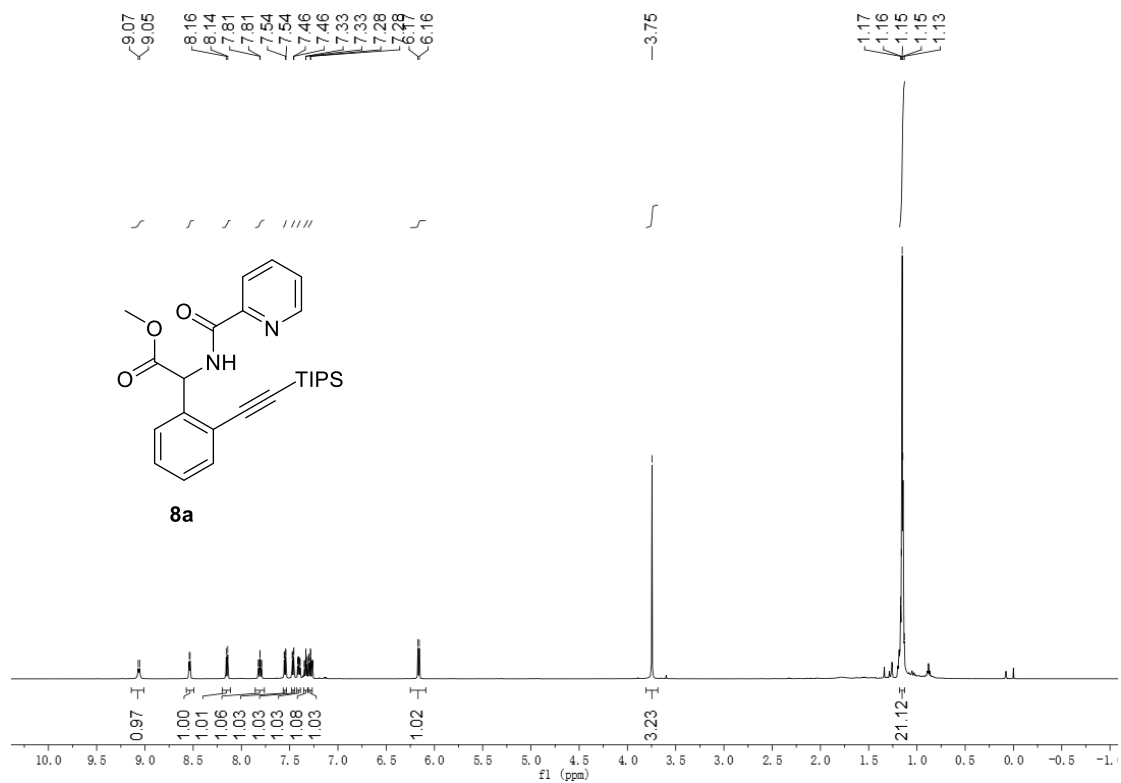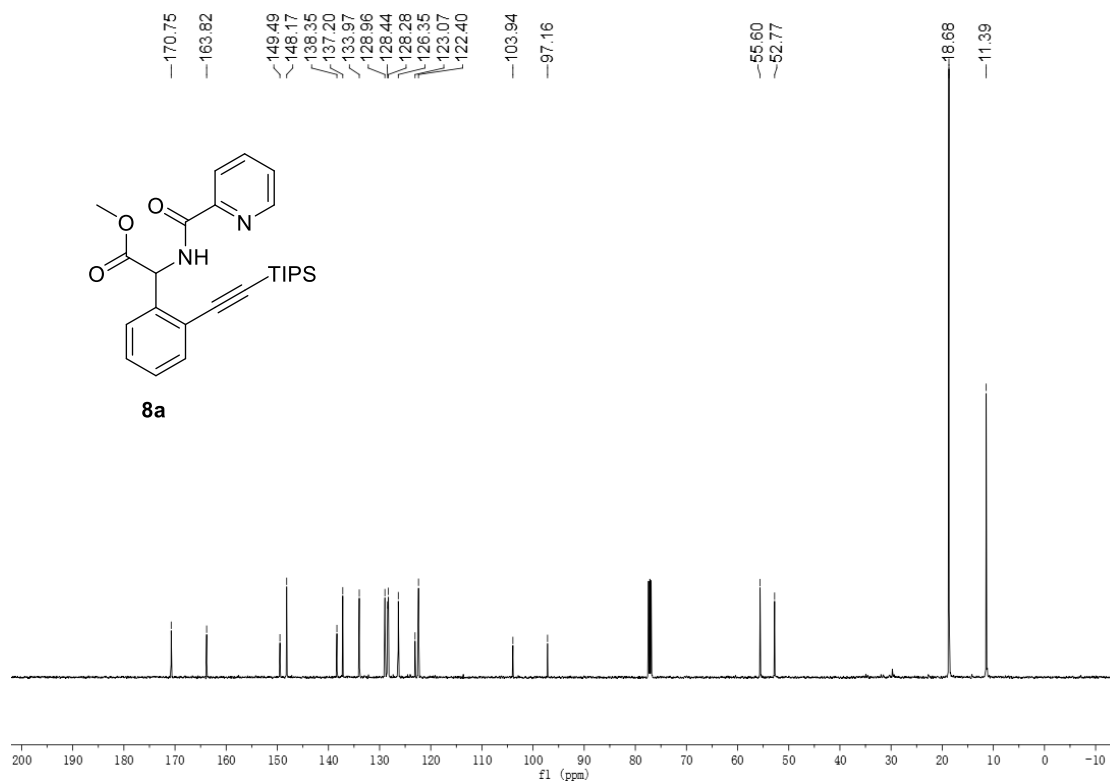

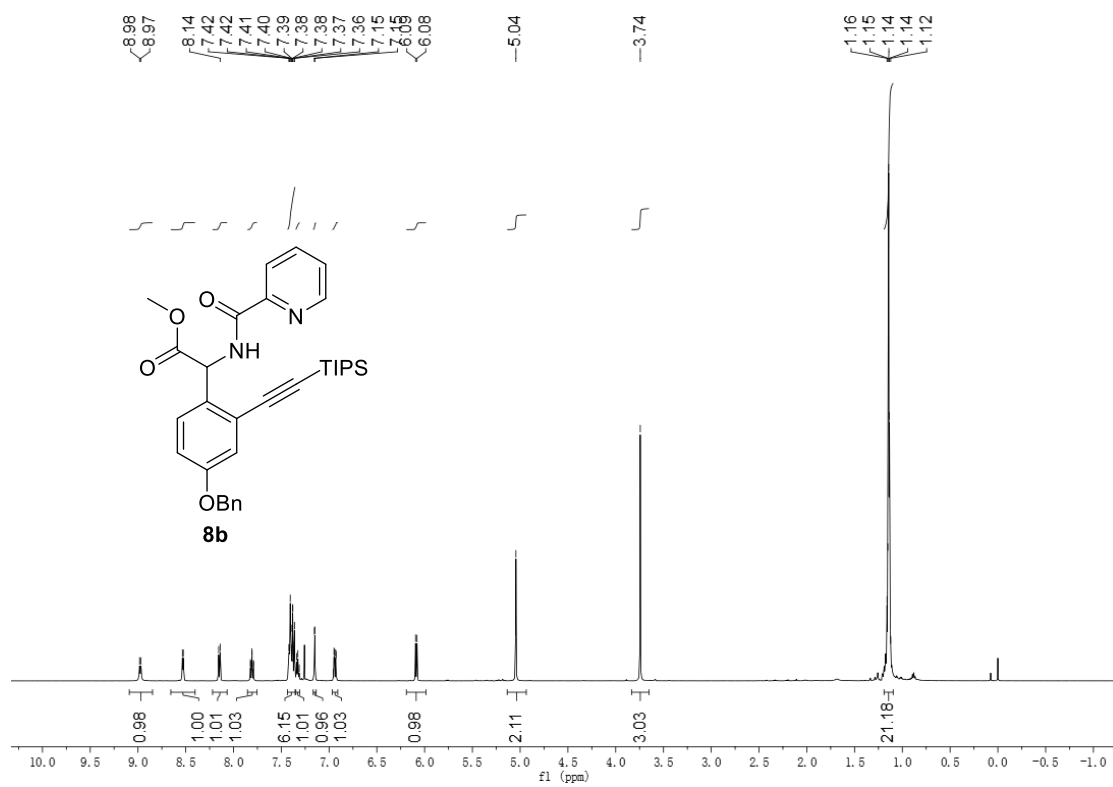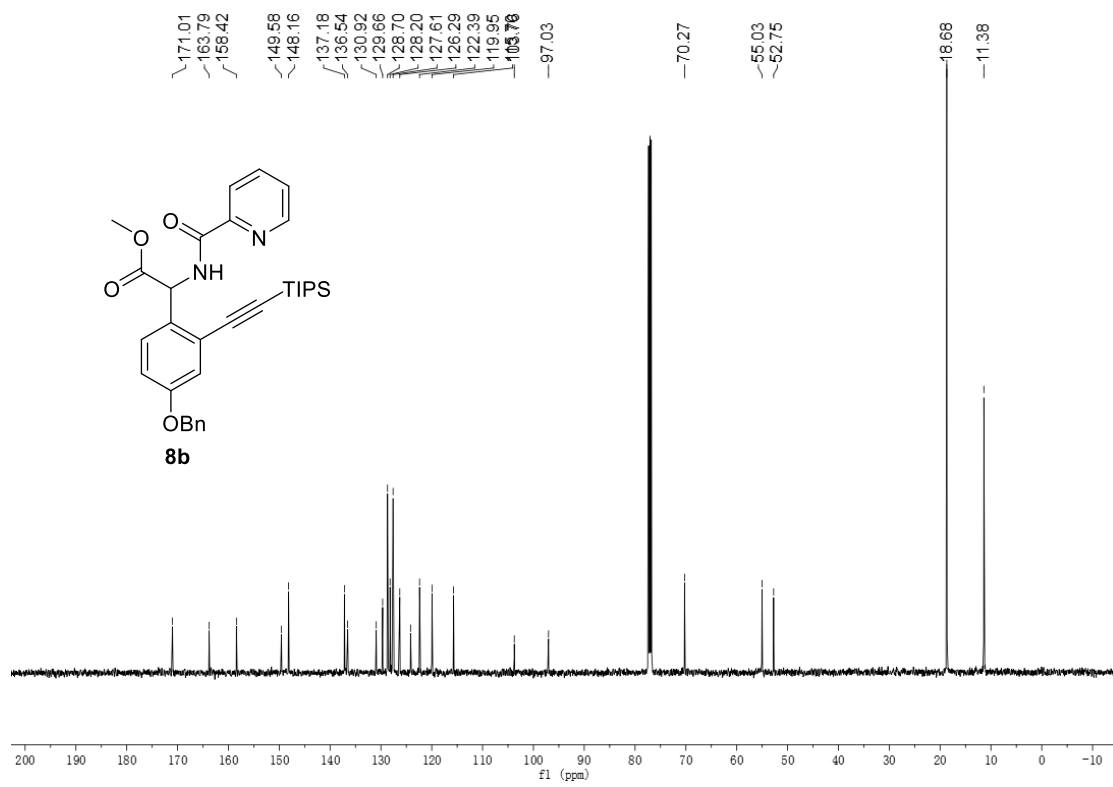

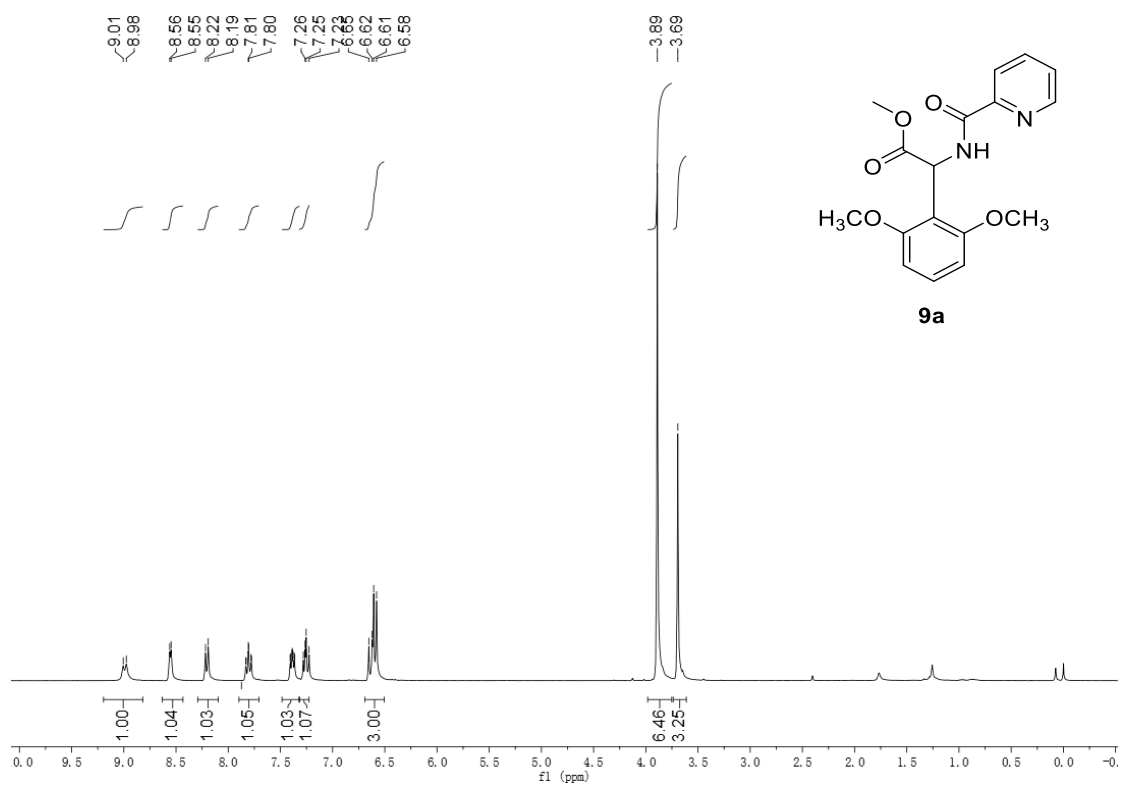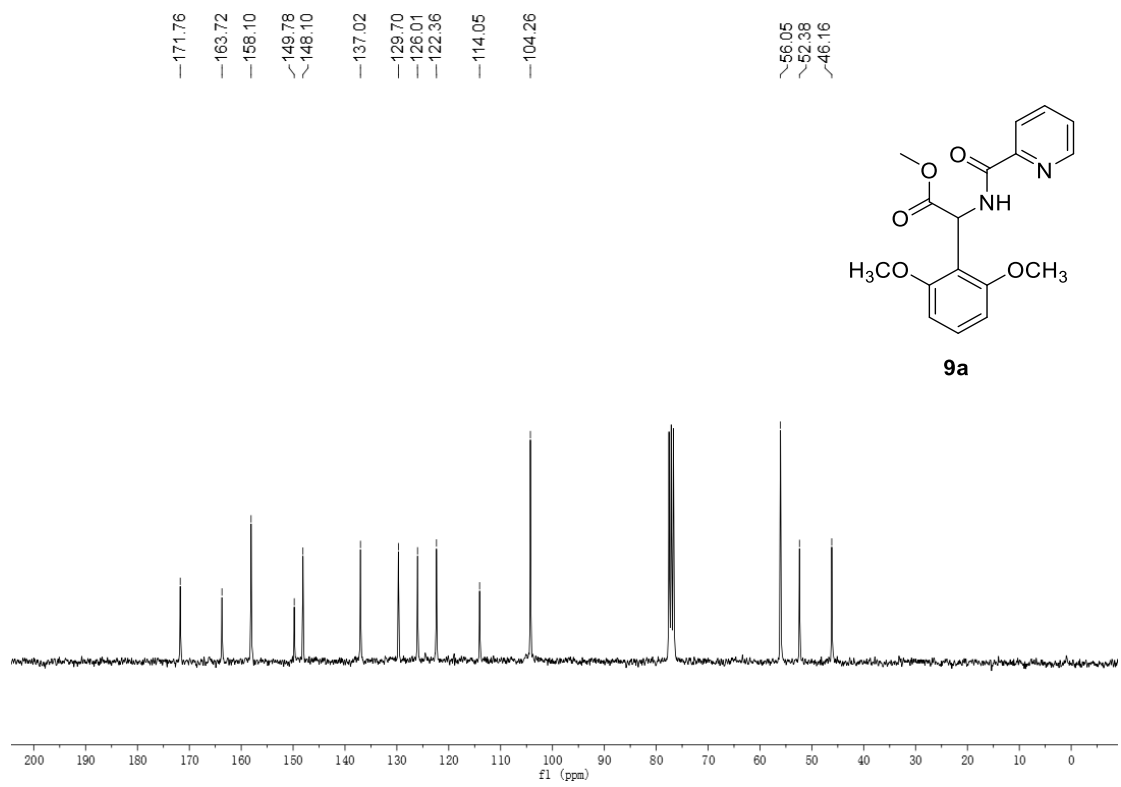

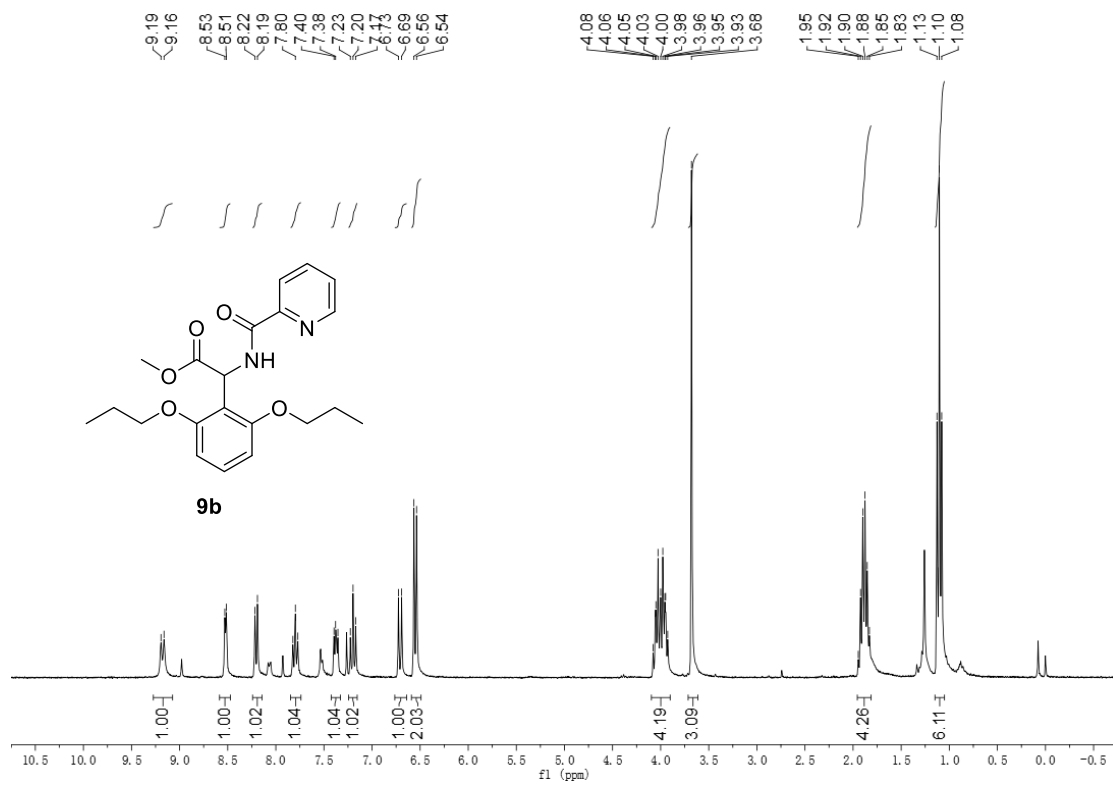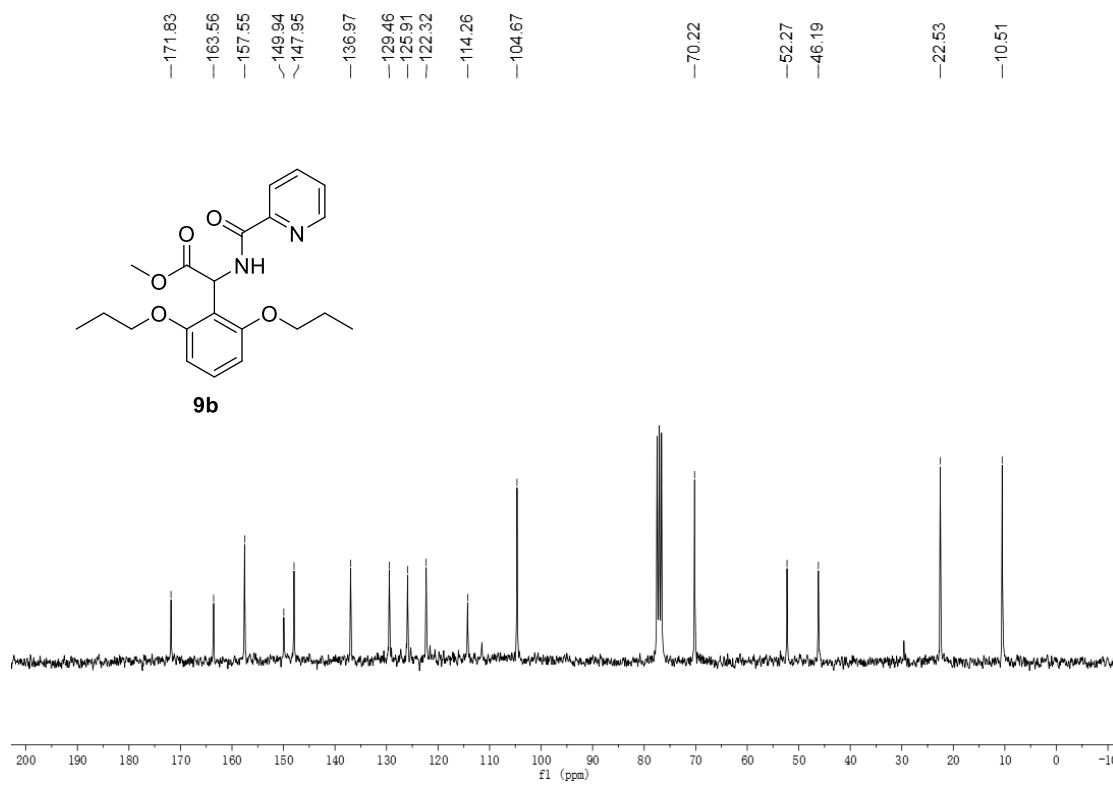



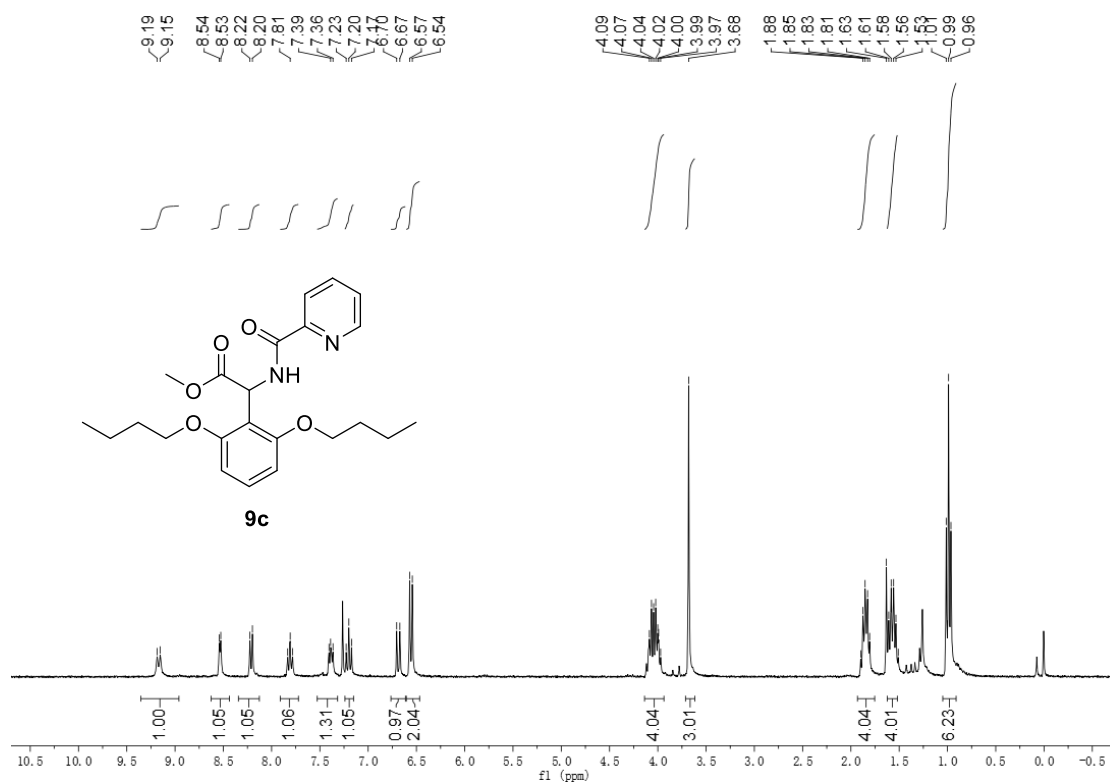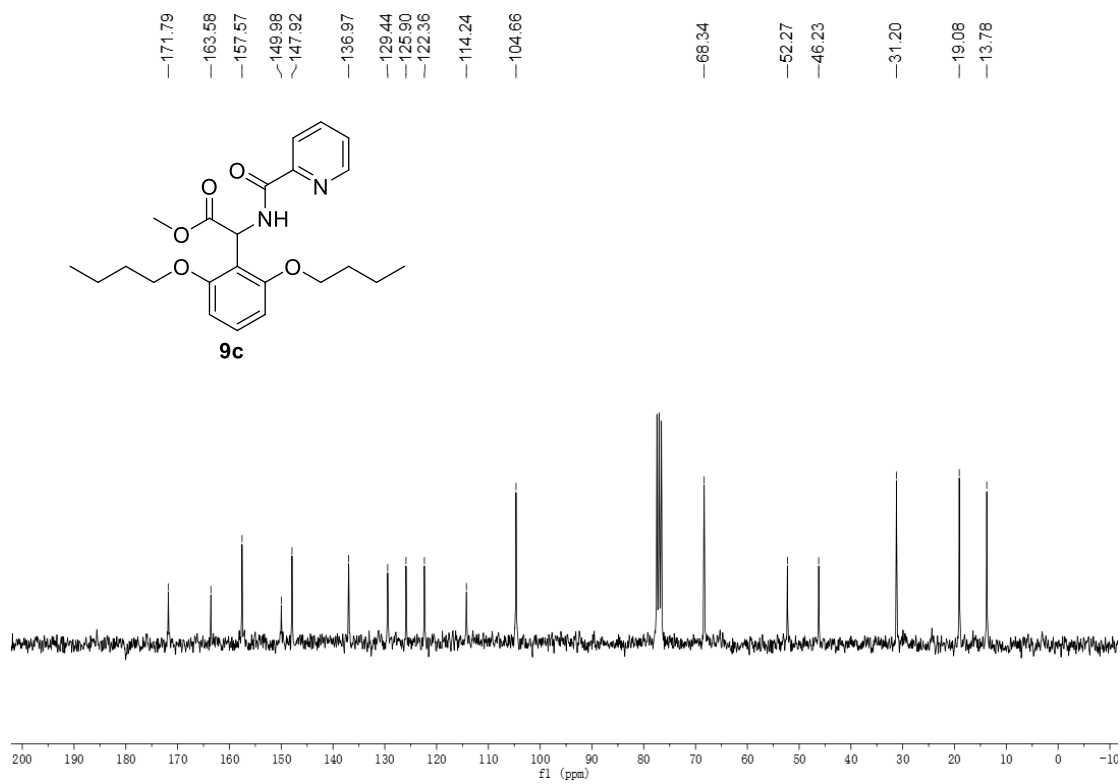

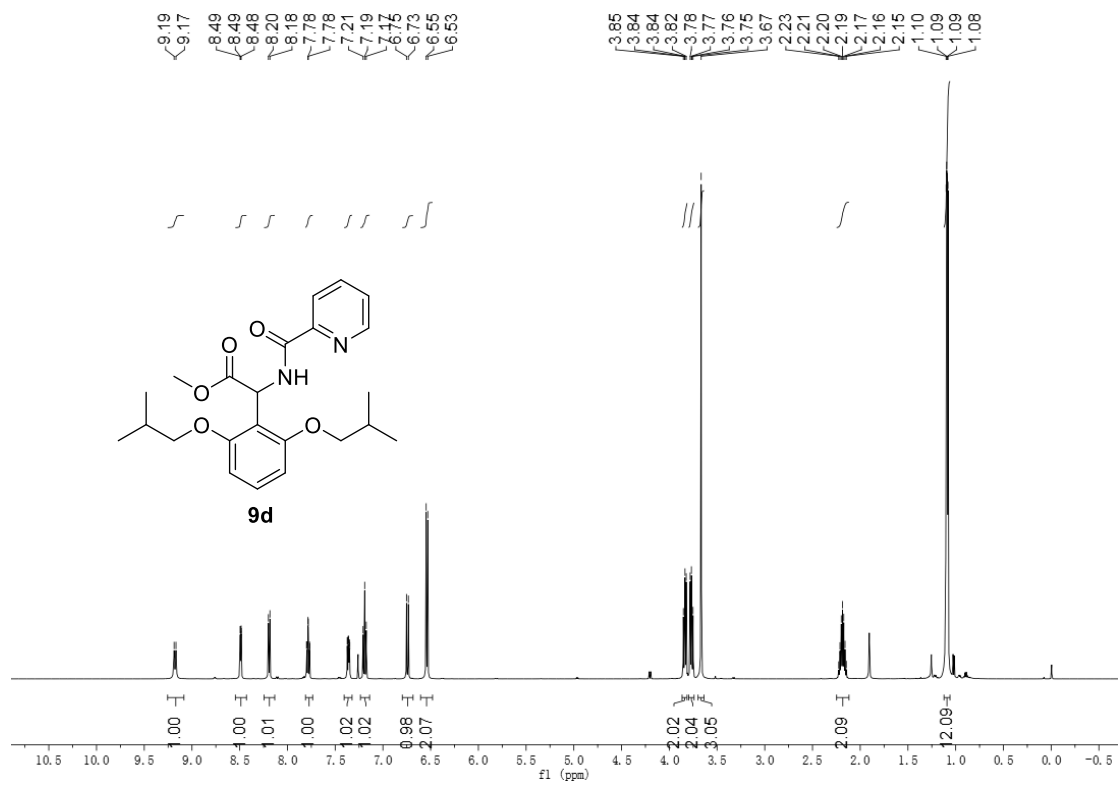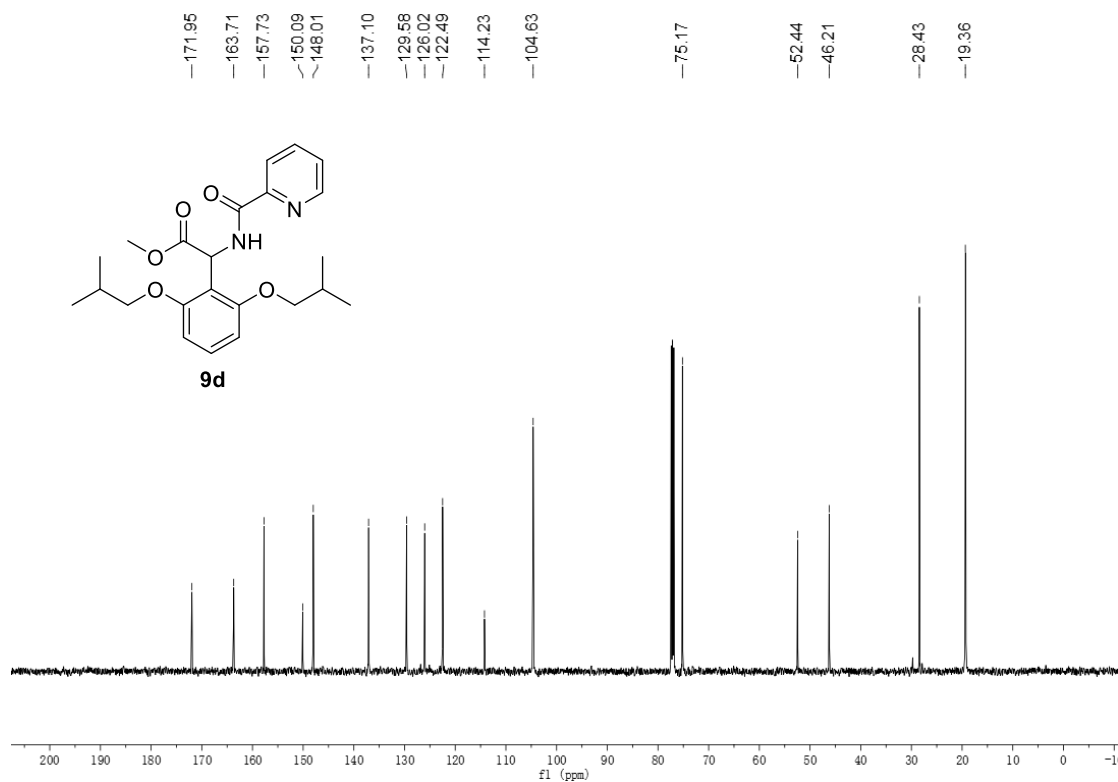

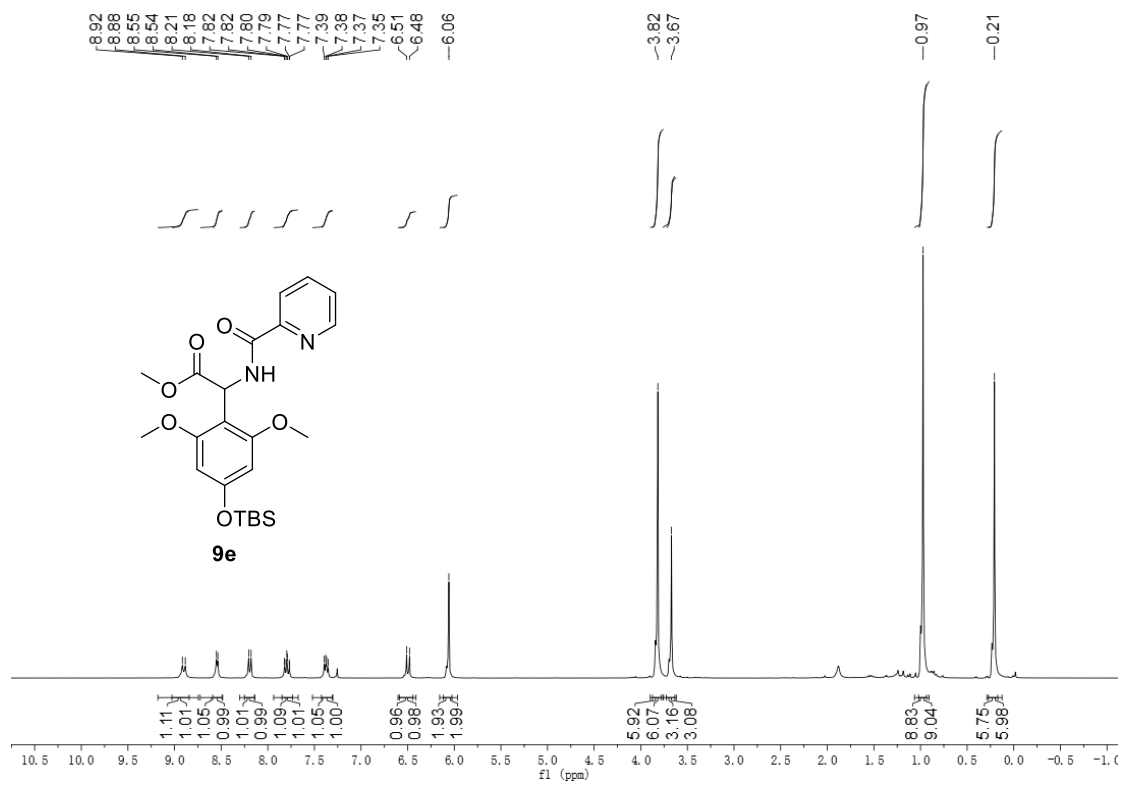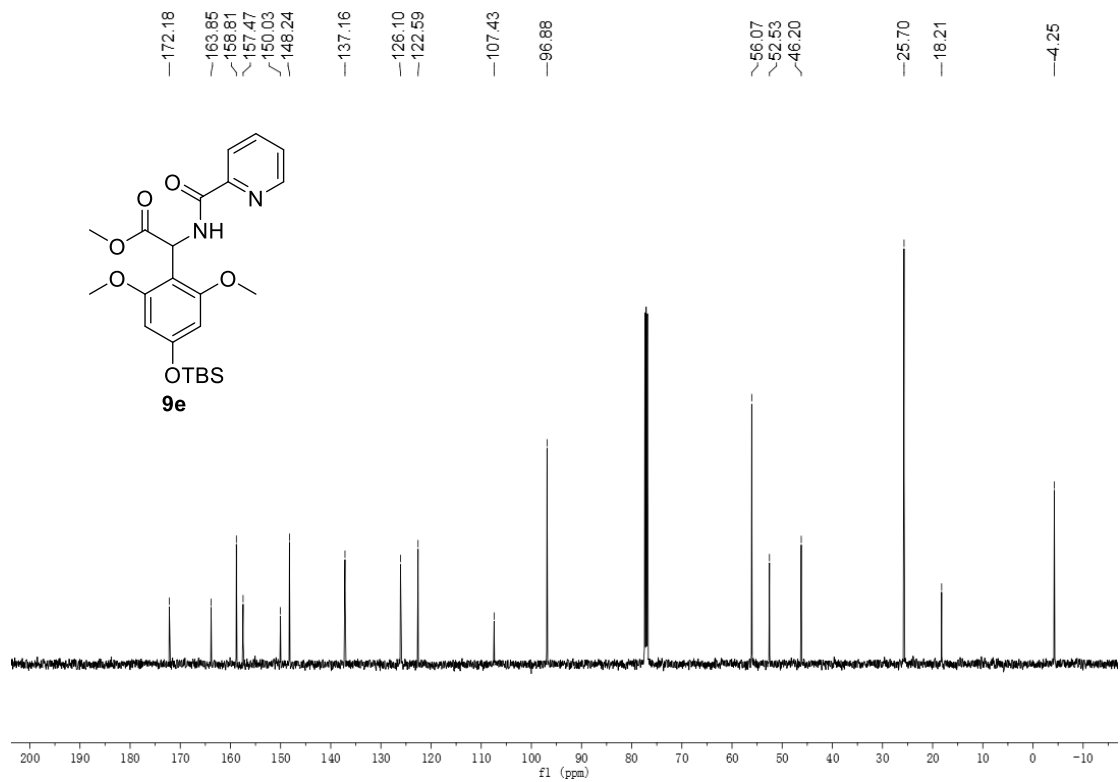

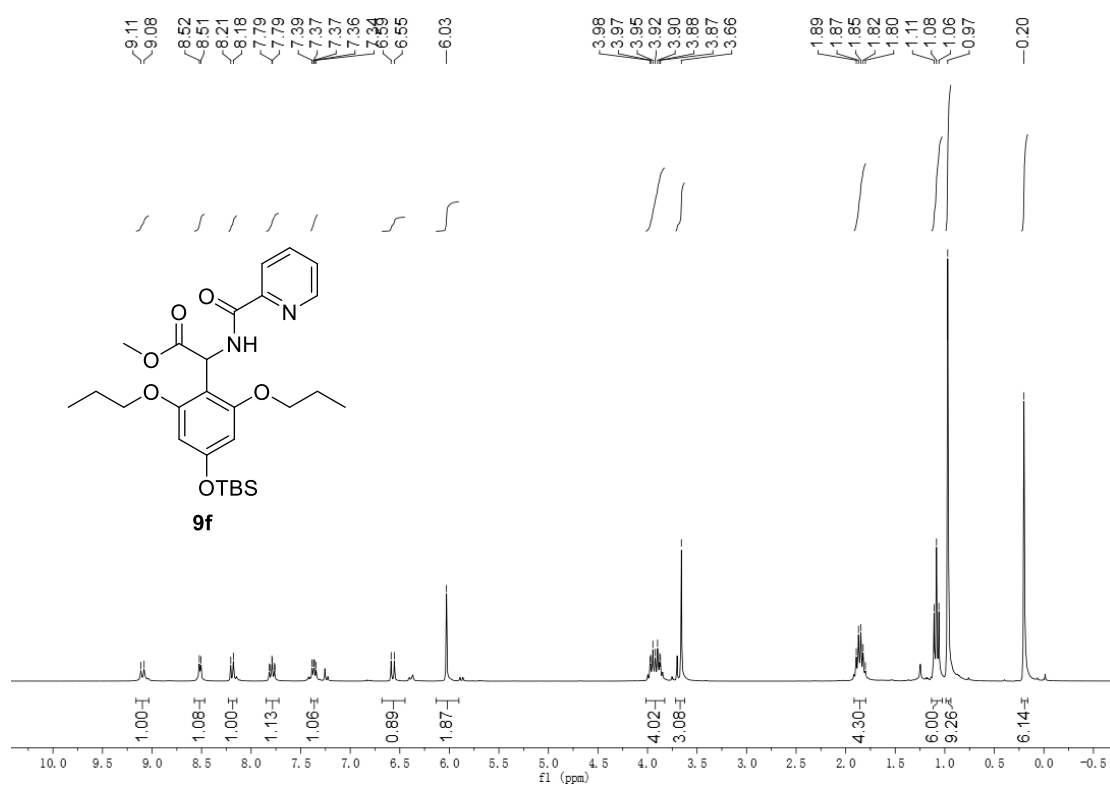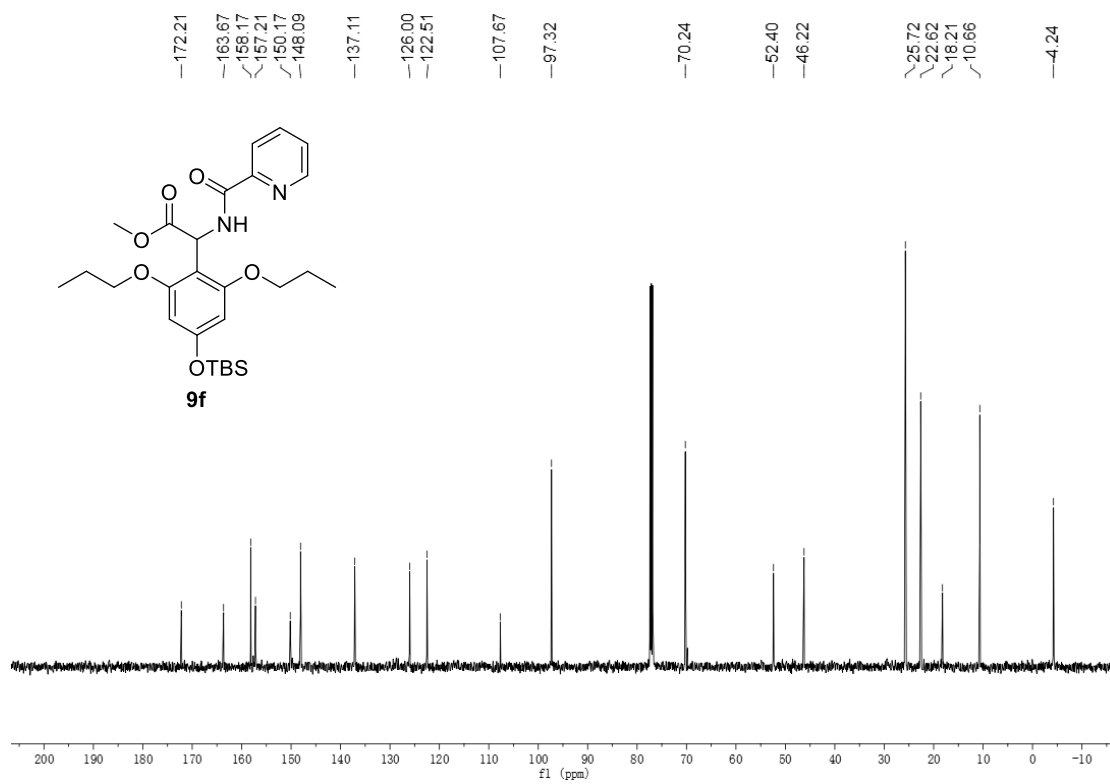

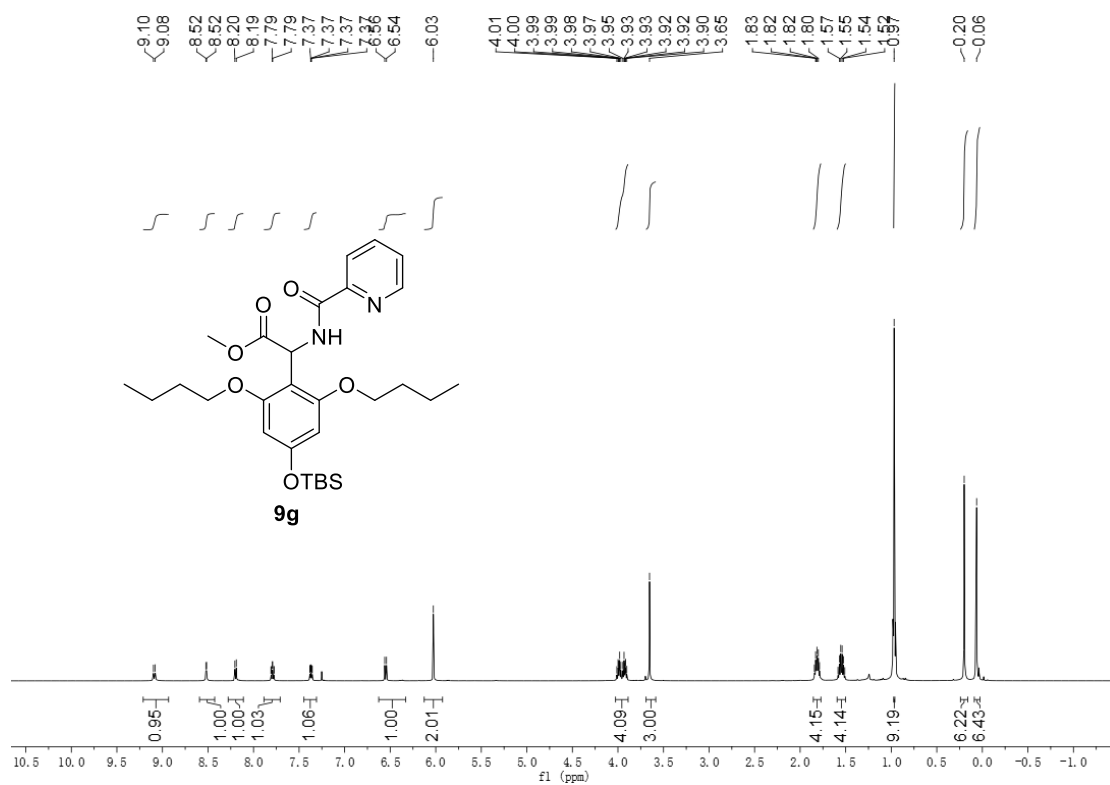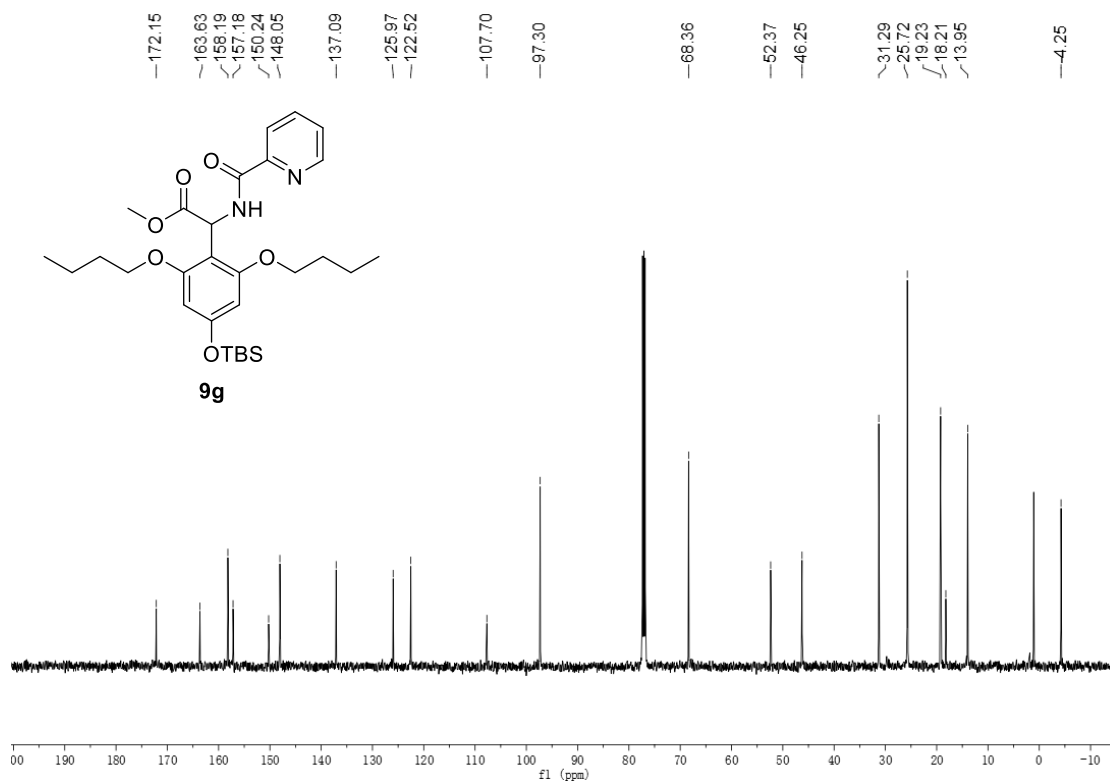

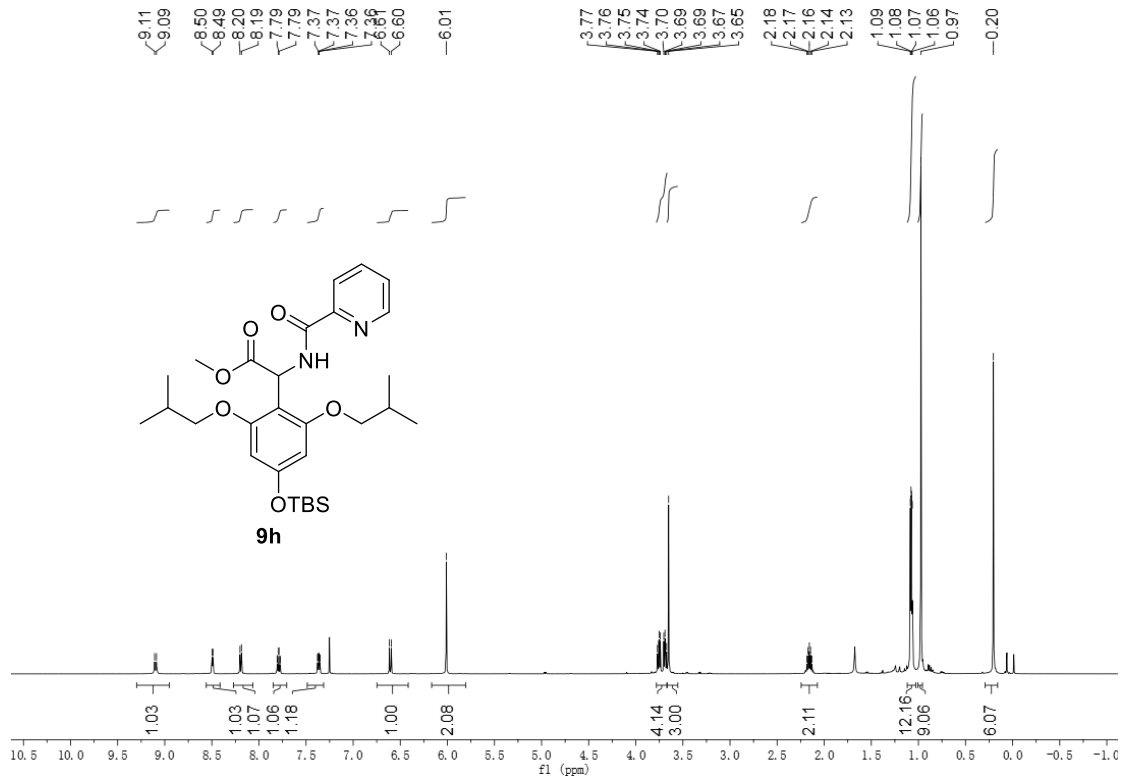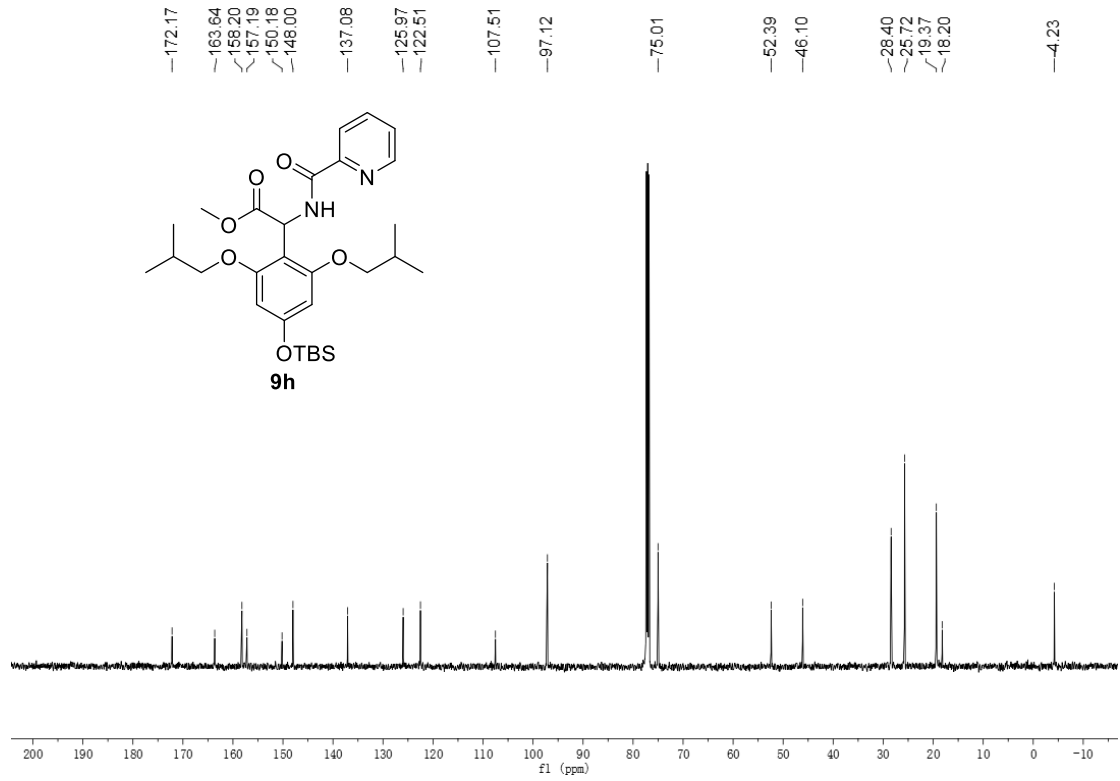

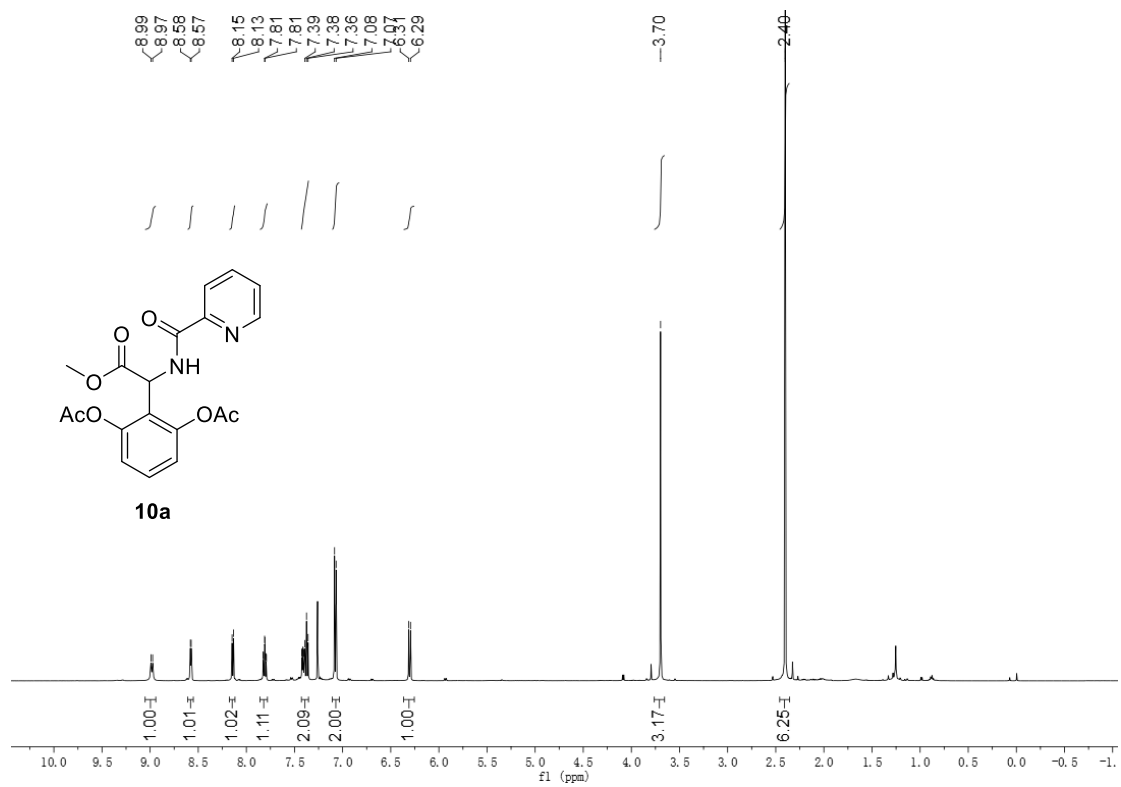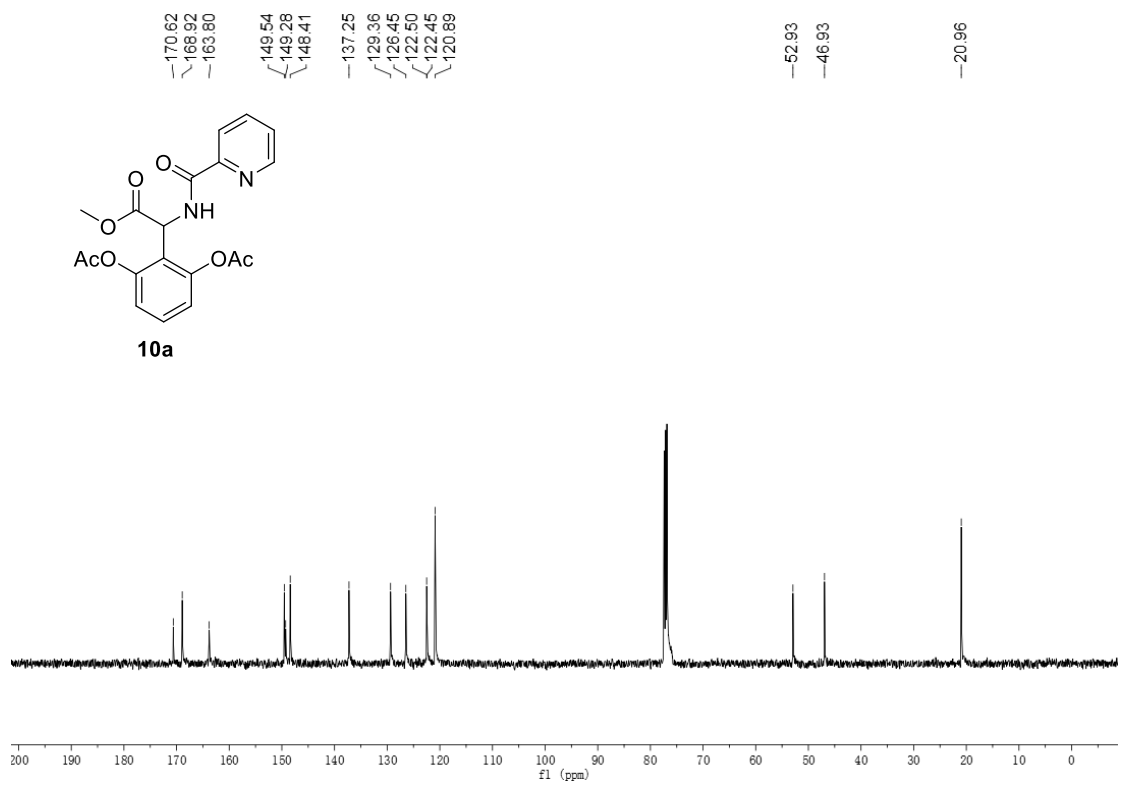

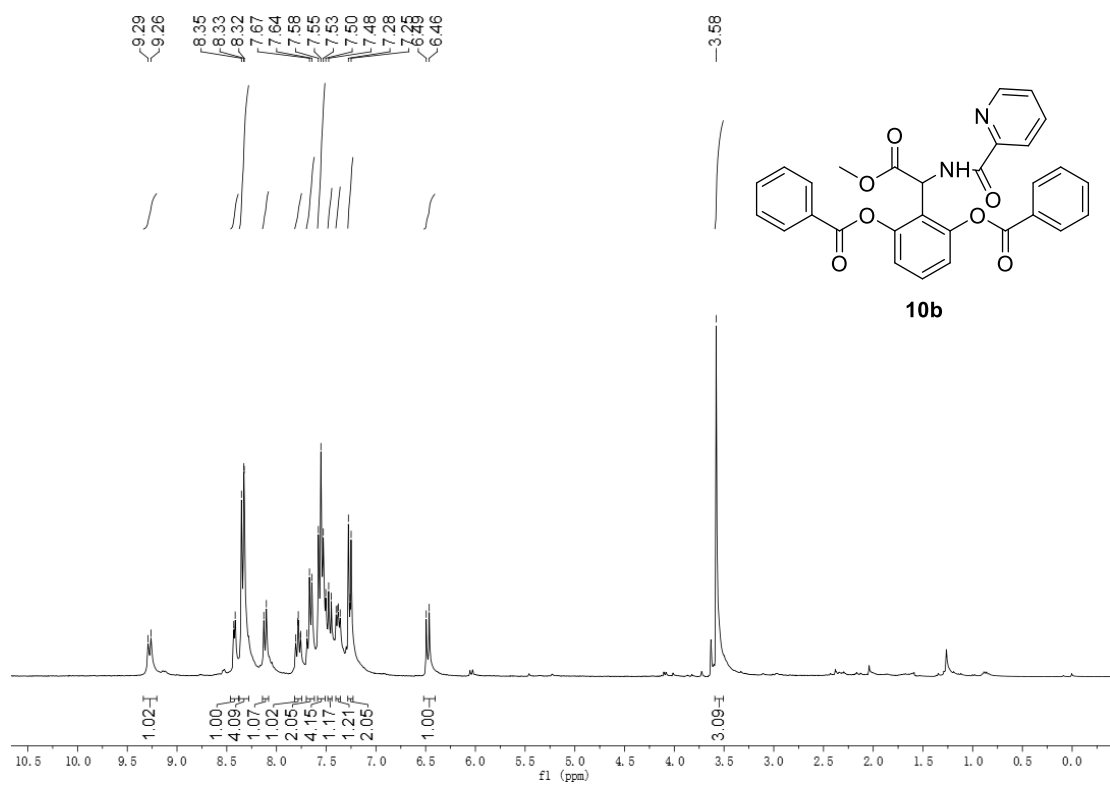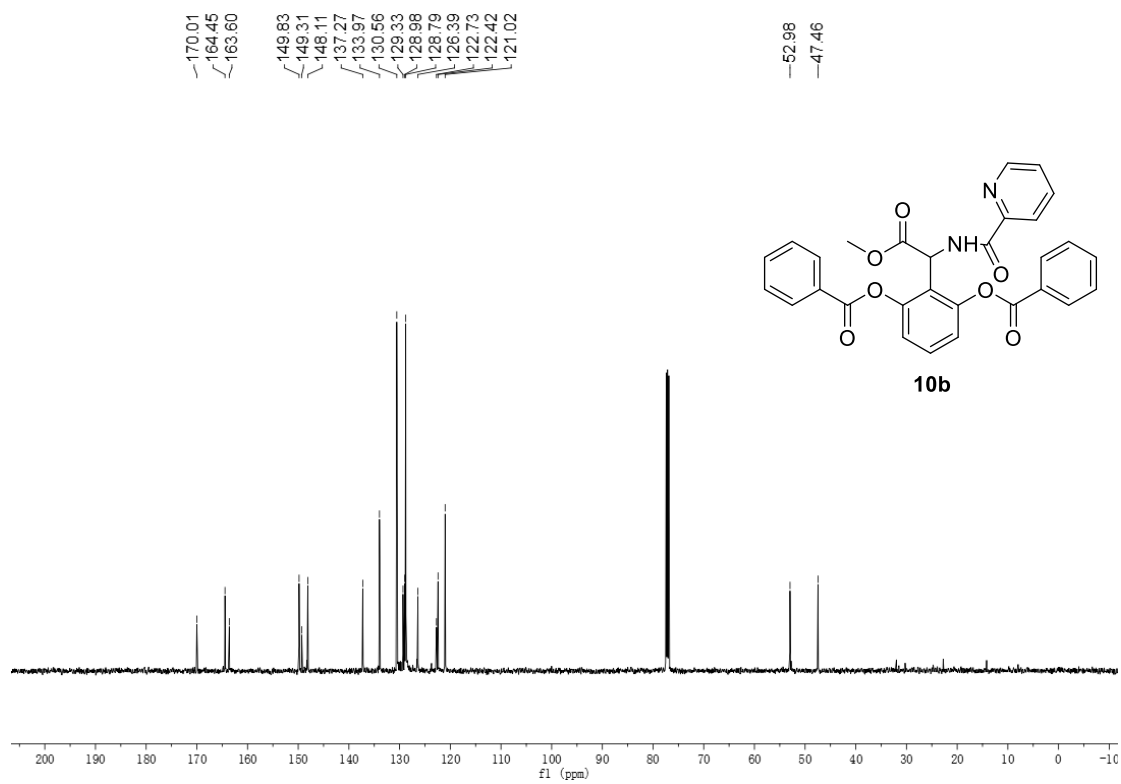



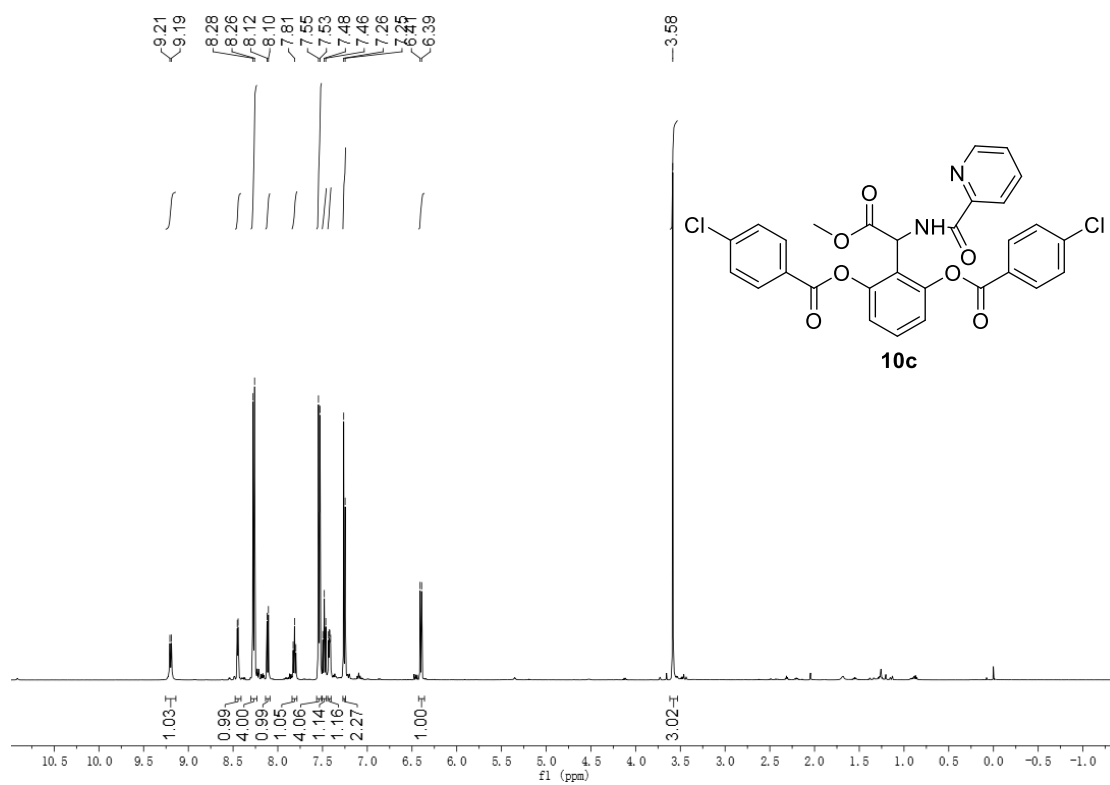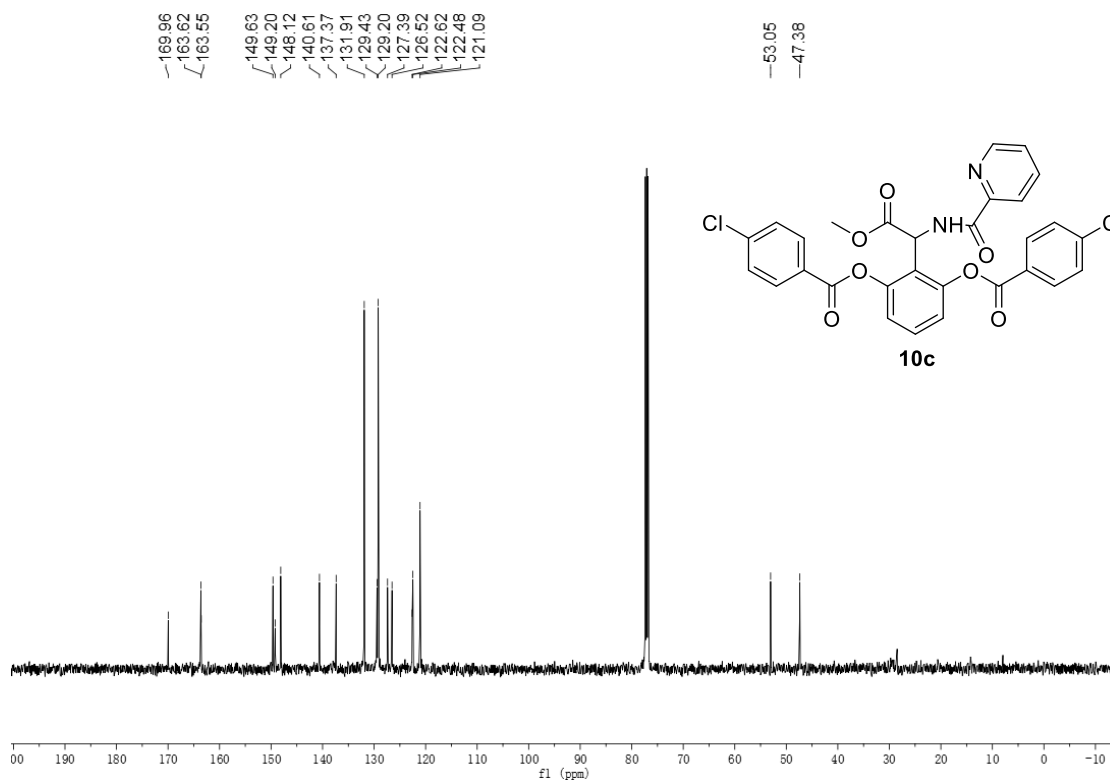

Supplement: c7ob02921g1.pdf [file c7ob02921g1.pdf]
